# Supplementary material
Source: publisher figshare collection journal article supplement (https://acs.figshare.com/ndownloader/files/4721413)
Supplement: Supplementary file 1 [file 4721413]

## SUPPORTING INFORMATION

### **Carbocyclization by Radical Closure onto *O*-Trityl Oximes: Dramatic Effect of Diphenyl Diselenide**

Derrick L. J. Clive,\* Mai P. Pham and Rajendra Subedi

*Chemistry Department, University of Alberta, Edmonton, Alberta, Canada T6G 2G2*

*derrick.clive@ualberta.ca*

Experimental procedures for:

Experimental procedures for **7-11**, **12** (from **11**), **13-17**, **19-27-30**, **32-33**, **34** (from **22**), **35**, **37**, **39**, **41-45**, **47**, **49**, **51**, **53-54**, **56-58**, **60-62**, *trans*-2-[(2-bromocyclohexyl)oxy]acetaldehyde *O*-(phenylmethyl)oxime, *O*-benzyl-*N*-[(3 $\alpha$ ,7 $\alpha$ )octahydrobenzofuran-3-yl]hydroxylamine S2

References and footnotes

S29

NMR spectra of **7**, **9-32**, **34-38**, **41-42**, **47**, **49**, **51**, **53-54**, **56-58**, **60-62**, *trans*-[(2-iodocyclohexyl)oxy]acetaldehyde, acetic acid (1-iodomethyl)pent-4-enyl ester, acetic acid 1-(iodomethyl)-4-oxobutyl ester, *trans*-2-[(2-bromocyclohexyl)oxy]acetaldehyde *O*-(phenylmethyl)oxime, *O*-benzyl-*N*-[3 $\alpha$ ,7 $\alpha$ ]-octahydrobenzofuran-3-yl]hydroxylamine S30

### 5-Bromopentanal *O*-(Triphenylmethyl)oxime (**7**).

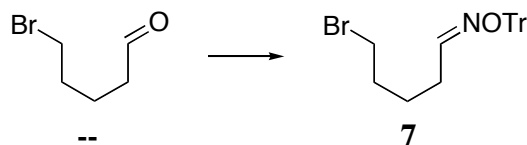

The general procedure for making *O*-trityl oximes was followed, using TrONH<sub>2</sub> (850 mg, 3.08 mmol) and 5-bromopentanal<sup>14</sup> (505 mg, 3.08 mmol) in THF (10 mL). Flash chromatography of the residue over silica gel (1.7 x 35 cm), using 5% EtOAc-hexane, gave **7** (1.07 g, 82%) as a foam, which was a 1:1 mixture of *Z* and *E* isomers (<sup>13</sup>C NMR): FTIR (CH<sub>2</sub>Cl<sub>2</sub> cast) 3056, 3022, 2935, 1596, 1491 cm<sup>-1</sup>; <sup>1</sup>H NMR (CDCl<sub>3</sub>, 500 MHz) δ 1.43-1.54 (m, 1 H), 1.60-1.71 (m, 2 H), 1.81-1.93 (m, 1 H), 2.11-2.15 (m, 1 H), 2.53-2.60 (m, 1 H), 3.22 (t, *J* = 6.7 Hz, 1 H), 3.38 (t, *J* = 6.7 Hz, 1 H), 6.71 (t, *J* = 6.0 Hz, 0.42 H), 7.49-7.34 (m, 15 H), 7.52 (t, *J* = 6.0 Hz, 0.5 H); <sup>13</sup>C NMR (CDCl<sub>3</sub>, 125.7 MHz) 24.7 (t), 24.8 (t), 25.5 (t), 28.5 (t), 31.4 (t), 32.3 (t), 33.2 (t), 33.4 (t), 90.3 (s), 90.4 (s), 126.9 (d), 127.0 (d), 127.4 (d), 127.5 (d), 128.8 (d), 129.1 (d), 144.4 (s), 144.5 (s), 150.1 (d), 151.2 (d); exact mass (electrospray) *m/z* calcd for C<sub>24</sub>H<sub>24</sub><sup>79</sup>BrNNaO 444.0938, found 444.0943.

### Cyclopentanone Oxime (**8**).

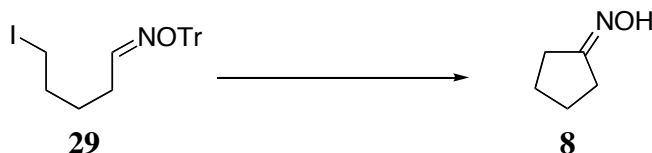

General procedure B for radical cyclization was followed using **29** (353.3 mg, 0.7535 mmol), PhSeSePh (47 mg, 0.15 mmol) and Hünig's base (0.52 mL, 3.014 mmol) in THF (20 mL), Bu<sub>3</sub>SnH (0.24 mL, 0.892 mmol) in THF (5 mL) and ABC (184 mg, 0.753 mmol) in THF (5 mL). After evaporation of the solvent, flash chromatography of the residue over silica gel (1.5 x 30 cm), using 30% EtOAc-hexane, gave cyclopentanone oxime (**8**)<sup>25</sup> (0.0689, 92%).

### 2-[(Phenylseleno)methoxy]benzaldehyde *O*-(Triphenylmethyl)oxime (**9**).

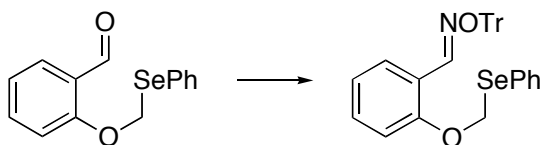

--

9

The general procedure for making *O*-trityl oximes was followed, using TrONH<sub>2</sub> (193 mg, 0.702 mmol) and 2-[(phenylseleno)methoxy]benzaldehyde<sup>15</sup> (204.6 mg, 0.7007 mmol) in THF (5 mL). Flash chromatography of the residue over silica gel (1.7 x 30 cm), using 7% EtOAc-hexane, gave **9** (362 mg, 95%) as a foam, which appeared to be a single isomer (<sup>1</sup>H and <sup>13</sup>C NMR): FTIR (CH<sub>2</sub>Cl<sub>2</sub> cast) 3056, 3032, 1599, 1577, 1484, 1448 cm<sup>-1</sup>; <sup>1</sup>H NMR (CDCl<sub>3</sub>, 400 MHz) δ 5.66 (s, 2 H), 6.82-6.91 (m, 2 H), 7.20-7.63 (m, 22 H), 8.52 (s, 1 H); <sup>13</sup>C NMR (CDCl<sub>3</sub>, 100.6 MHz) δ 68.7 (t), 91.1 (s), 114.2 (d), 122.3 (d), 123.2 (s), 127.1 (d), 127.5 (d), 127.9 (d), 129.4 (d), 129.5 (s), 130.5 (d), 133.8 (d), 144.4 (d), 144.6 (s), 154.8 (s); exact mass (electrospray) *m/z* calcd for C<sub>33</sub>H<sub>27</sub>NNaO<sub>2</sub><sup>80</sup>Se 572.1104, found 572.1100.

The oxime geometry was not determined.

### 3(2*H*)-Benzofuranone Oxime (**10**).<sup>26</sup>

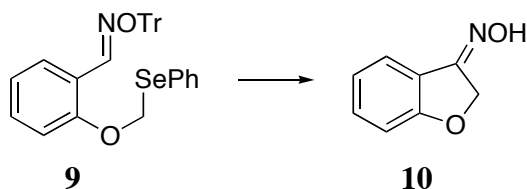

General procedure A for radical cyclization was followed, using **9** (238 mg, 0.434 mmol) in THF (30 mL), Bu<sub>3</sub>SnH (510.0 mg, 1.737 mmol) in THF (10 mL), ABC (11 mg, 0.043 mmol) in THF (10 mL), and *i*-Pr<sub>2</sub>NEt (230 mg, 1.74 mmol). Flash chromatography of the residue over silica gel (1.7 x 20 cm), using 10% EtOAc-hexane, gave **10** (59.2 mg, 91%) as a crystalline solid, which was a single isomer of unestablished geometry: mp 158-161 °C; FTIR 3131, 3046, 2841, 1666, 1605, 1591, 1481 cm<sup>-1</sup>; <sup>1</sup>H NMR (CD<sub>2</sub>Cl<sub>2</sub>, 400 MHz) δ 5.18 (s, 2 H), 6.86-7.11 (m, 2 H), 7.32-7.4 (m, 1 H), 7.58-7.60 (m, 1 H), 7.98 (s, 1 H); <sup>13</sup>C NMR (CDCl<sub>3</sub>, 125.7 MHz) δ 70.6 (t), 111.4 (d), 119.6 (s), 121.5 (d), 121.9 (d), 132.7 (d), 158.3 (s), 165.5 (s); exact mass *m/z* calcd for C<sub>8</sub>H<sub>7</sub>NO<sub>2</sub> 149.0476, found 149.0477.

### 2-(2-Bromoethyl)benzaldehyde *O*-(Triphenylmethyl)oxime (**11**).

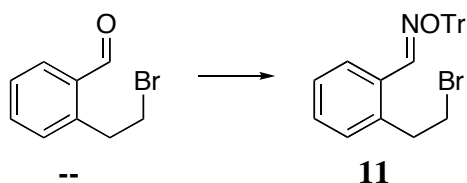

The general procedure for making *O*-trityl oximes was followed, using TrONH<sub>2</sub> (1.094 g, 3.978 mmol) and 2-(2-bromoethyl)benzaldehyde<sup>16</sup> (1.06 g, 4.97 mmol) in THF (15 mL). Flash chromatography of the residue over silica gel (4 x 32 cm), using 5% EtOAc-hexane, gave **11** (1.75 g, 94%) as a foam, which was a single isomer: FTIR (CH<sub>2</sub>Cl<sub>2</sub> cast) 3057, 3022, 1957, 1597, 1490 cm<sup>-1</sup>; <sup>1</sup>H NMR (CDCl<sub>3</sub>, 300 MHz) δ 3.01-3.18 (m, 4 H), 7.11-7.45 (m, 19 H), 8.41 (s, 1 H); <sup>13</sup>C NMR (CDCl<sub>3</sub>, 125.7 MHz) δ 32.9 (t), 37.5 (t), 91.3 (s), 127.1 (d), 127.2 (d), 127.5 (d), 127.8 (d), 129.1 (d), 129.2 (d), 130.4 (s), 130.5 (d), 131.5 (d), 137.4 (s), 144.3 (s), 149.1 (d); exact mass (electrospray) *m/z* calcd for C<sub>28</sub>H<sub>24</sub><sup>79</sup>BrNNaO 492.0938 found 492.0928.

The oxime geometry was not determined.

### 2,3-Dihydro-1*H*-inden-1-one Oxime (**12**) (from **11**).<sup>22,23</sup>

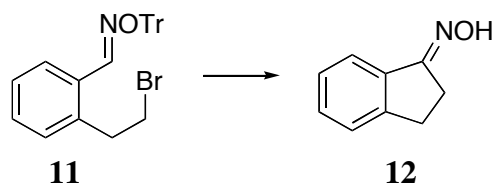

General procedure A for radical cyclization was followed, using **11** (211 mg, 0.449 mmol) in THF (30 mL), Bu<sub>3</sub>SnH (524 mg, 1.81 mmol) in THF (8 mL), ABC (11 mg, 0.045 mmol) in THF (8 mL), and *i*-Pr<sub>2</sub>NEt (232 mg, 1.81 mmol). Flash chromatography of the residue over silica gel (1.7 x 18 cm), using 10% EtOAc-hexane, gave **12** (57.3 mg, 87%) as a crystalline solid, which was a single isomer: mp 148-150 °C (Lit.<sup>22</sup> mp 153-154 °C); FTIR (CH<sub>2</sub>Cl<sub>2</sub> cast) 3064, 2861, 1654, 1598, 1479, 1460 cm<sup>-1</sup>; <sup>1</sup>H NMR (CDCl<sub>3</sub>, 500 MHz) δ 2.92-3.01 (m, 2 H), 3.05-3.18 (m, 2 H), 7.20-7.41 (m, 3 H), 7.64-7.67 (m, 1 H), 9.15 (s, 1 H); <sup>13</sup>C NMR (CDCl<sub>3</sub>, 125.7 MHz) δ 26.0 (t), 28.6 (t), 121.5 (d), 125.5 (d), 126.9 (d), 130.3 (d), 135.8 (s), 148.3 (s), 163.9 (s); exact mass *m/z* calcd for C<sub>9</sub>H<sub>9</sub>NO 147.0684, found 147.0682.

The <sup>13</sup>C NMR spectrum (DMSO-*d*<sub>6</sub>) of the so-called *E*-isomer has been reported;<sup>23</sup> but the spectrum of our material, also in DMSO-*d*<sub>6</sub>, is different from the reported spectrum. Our sample had: <sup>13</sup>C NMR (DMSO-*d*<sub>6</sub>, 125.7 MHz) δ 25.4 (t), 27.8 (t), 120.4 (d), 125.6 (d), 126.7 (d), 129.5 (d), 136.4 (s), 147.5 (s), 160.8 (s). A sample crystallized from a mixture of *i*-PrOH and hexane gave material suitable for X-ray analysis, which established the *E*-geometry.

### 2-(2-Bromoethoxy)benzaldehyde *O*-(Triphenylmethyl)oxime (**13**).



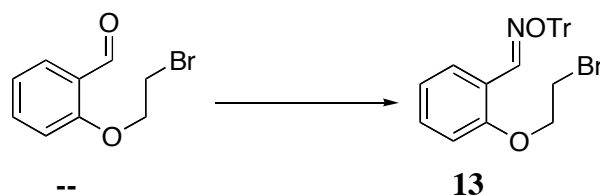

The general procedure for making *O*-trityl oximes was followed, using TrONH<sub>2</sub> (180 mg, 0.654 mmol) and 2-(2-bromoethoxy)benzaldehyde<sup>17</sup> (150 mg, 0.654 mmol) in THF (10 mL). Flash chromatography of the residue over silica gel (1.7 x 30 cm), using 5% EtOAc-hexane, gave **13** (289 mg, 92%) as a foam, which appeared to be a single isomer (<sup>1</sup>H and <sup>13</sup>C NMR): FTIR (CH<sub>2</sub>Cl<sub>2</sub> cast) 3056, 3033, 1599, 1488, 1448, 1421 cm<sup>-1</sup>; <sup>1</sup>H NMR (CDCl<sub>3</sub>, 200 MHz) δ 3.66 (t, *J* = 9.0 Hz, 2 H), 4.31 (t, *J* = 9.0 Hz, 2 H), 6.81-7.59 (m, 19 H), 8.65 (s, 1 H); <sup>13</sup>C NMR (CDCl<sub>3</sub>, 50.3 MHz) δ 28.9 (t), 68.3 (t), 91.1 (s), 112.3 (d), 121.5 (d), 121.9 (s), 127.1 (d), 127.3 (d), 127.5 (d), 127.9 (d), 129.3 (d), 130.7 (d), 144.3 (d), 144.5 (s), 155.9 (s); exact mass (electrospray) *m/z* calcd for C<sub>28</sub>H<sub>24</sub><sup>79</sup>BrNNaO 508.0888, found 508.08828.

The oxime geometry was not determined.

#### 2,3-Dihydro-4*H*-1-benzopyran-4-one Oxime (**14**).<sup>27</sup>

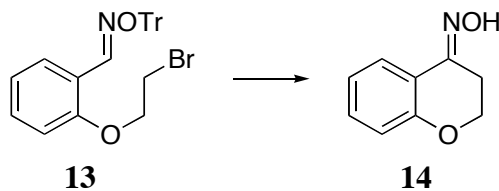

General procedure A for radical cyclization was followed, using **13** (151.7 mg, 0.3121 mmol) in THF (20 mL), Bu<sub>3</sub>SnH (340.0 mg, 1.248 mmol) in THF (5 mL), ABC (8 mg, 0.03 mmol) in THF (5 mL), and *i*-Pr<sub>2</sub>NEt (200 mg, 1.56 mmol). Flash chromatography of the residue over silica gel (1.7 x 18 cm) gave **14** (46.1 mg, 92%) as a crystalline solid: mp 139-141 °C (lit.<sup>27</sup> 138 °C); FTIR (CH<sub>2</sub>Cl<sub>2</sub> cast) 3263, 2988, 2922, 1958, 1647 cm<sup>-1</sup>; <sup>1</sup>H NMR (CDCl<sub>3</sub>, 400 MHz) δ 2.99 (t, *J* = 7.0 Hz, 2 H), 4.22 (t, *J* = 7.0 Hz, 2 H), 6.84-6.88 (m, 2 H), 7.21-7.26 (m, 1 H), 7.67-7.81 (m, 1 H), 8.85 (br s, 1 H); <sup>13</sup>C NMR (CDCl<sub>3</sub>, 125.7 MHz) δ 23.6 (t), 64.9 (t), 117.7 (d), 118.2 (s), 121.4 (d), 123.9 (d), 131.1 (d), 150.0 (s), 156.6 (s); exact mass *m/z* calcd for C<sub>9</sub>H<sub>9</sub>NO<sub>2</sub> 163.0633, found 163.0632.

Although the compound is known,<sup>27</sup> its geometry was not reported, and we did not establish the geometry. In a separate experiment triphenylmethane (78 mg, 56%) was isolated.

**4-*O*-Acetyl-5-bromo-5-deoxy-2,3-*O*-(1-methylethylidene)-D-ribose *O*-(Triphenylmethyl)oxime (**15**).**

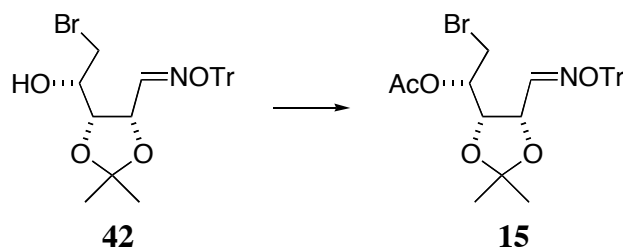

Ac<sub>2</sub>O (0.1 mL, 1 mmol) was added to a stirred solution of **42** (265.4 mg, 0.5214 mmol) in pyridine (1.0 mL), and stirring was continued overnight. Water (10 mL) was added and the solution was extracted with Et<sub>2</sub>O (2 x 10 mL). The combined organic extracts were washed with saturated aqueous NaHCO<sub>3</sub> (3 x 10 mL), water (2 x 10 mL) and brine (2 x 10 mL), dried (MgSO<sub>4</sub>), and evaporated. Flash chromatography of the residue over silica gel (1.7 x 32 cm), using 5% EtOAc-hexane, gave **15** (270 mg, 96%) as a foam, which was a 4.3:1 mixture of isomers (<sup>1</sup>H NMR): FTIR (CH<sub>2</sub>Cl<sub>2</sub> cast) 3057, 3034, 2987, 1749, 1491 cm<sup>-1</sup>; <sup>1</sup>H NMR (CDCl<sub>3</sub>, 400 MHz) δ 1.31 and 1.40 (two singlets, 3 H in all), 1.43 and 1.49 (two singlets, 3 H in all), 1.59 and 1.78 (two singlets, 3 H in all), 3.44-3.58 (two overlapping m, 2 H), 4.31-4.39 (m, 0.84 H), 4.61-4.72 (m, 1 H), 4.88-4.99 (m, 1 H), 5.46-5.51 (m, 0.22 H), 6.83 (d, *J* = 5.0 Hz, 0.69 H), 7.17-7.35 (m, 15 H), 7.42 (d, *J* = 8.0 Hz, 0.86 H); <sup>13</sup>C NMR (CDCl<sub>3</sub>, 125.7 MHz) δ 20.4 (q), 20.5 (q), 25.3 (q), 25.4 (q), 27.7 (q), 32.1 (t), 32.3 (t), 69.1 (d), 69.7 (d), 71.1 (d), 74.7 (d), 76.02 (d), 76.06 (d), 91.1 (s), 91.9 (s), 109.8 (s), 110.0 (s), 127.1 (d), 127.3 (d), 127.53 (d), 127.56 (d), 127.6 (d), 127.8 (d), 129.14 (d), 129.18 (d), 129.19 (d), 129.2 (d), 143.7 (s), 143.9 (s), 146.5 (d), 146.9 (d), 169.5 (s), 169.7 (s); exact mass (electrospray) *m/z* calcd for C<sub>29</sub>H<sub>30</sub><sup>79</sup>BrNNaO<sub>5</sub> 574.1205, found 574.1202.

**[4*R*-(3α,4β,6α)]-Tetrahydro-2,2-dimethyl-6-hydroximino-4*H*-cyclopenta-1,3-dioxol-4-yl Acetate (**16**).**

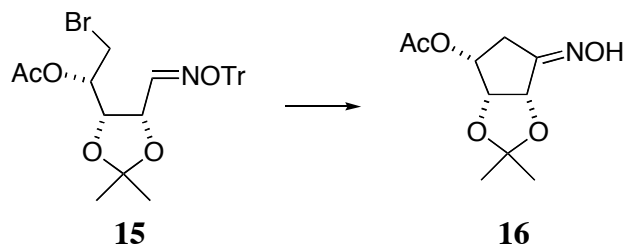

General procedure A for radical cyclization was followed, using **15** (250.0 mg, 0.4537 mmol) in THF (30 mL), Bu<sub>3</sub>SnH (0.49 mL, 1.814 mmol) in THF (10 mL), ABC (11 mg, 0.067 mmol) in THF (10 mL), and *i*-Pr<sub>2</sub>NEt (237.4 mg, 1.814 mmol). As some starting material was present after the arbitrary reflux period (TLC control), further portions of Bu<sub>3</sub>SnH (0.07 mL, 0.24 mmol), and ABC (8 mg, 0.03 mmol), each in THF (4 mL), were added slowly (4 h) as before, and refluxing was continued for 2 h after the addition. Flash chromatography of the residue over silica gel (1.7 x 20 cm), using 40% EtOAc-hexane, gave **16** (96.0 mg, 93%) as a crystalline solid, which was a single isomer: mp 151-154 °C; FTIR 3358, 2991, 2980, 2945, 1736 cm<sup>-1</sup>; <sup>1</sup>H NMR (CDCl<sub>3</sub>, 200 MHz) δ 1.33 (s, 3 H), 1.51 (s, 3 H), 2.15 (s, 3 H), 2.51-2.74 (m, 1 H), 3.11-3.32 (m, 1 H), 4.73-4.88 (m, 2 H), 7.62 (s, 1 H), δ 4.89-5.12 (m, 1 H); <sup>13</sup>C NMR (CD<sub>2</sub>Cl<sub>2</sub>, 50.3 MHz) δ 22.5 (q), 26.7 (q), 28.2 (q), 30.4 (t), 72.0 (d), 79.5 (d), 80.3 (d), 114.7 (s), 159.6 (s), 172.2 (s); exact mass (electrospray) *m/z* calcd for C<sub>10</sub>H<sub>15</sub>NNaO<sub>5</sub> 252.0847, found 252.0848.

The oxime geometry was not established.

**2,3,4-Tris-*O*-Acetyl-5-Bromo-5-deoxy-D-ribose *O*-(Triphenylmethyl)oxime (17).**

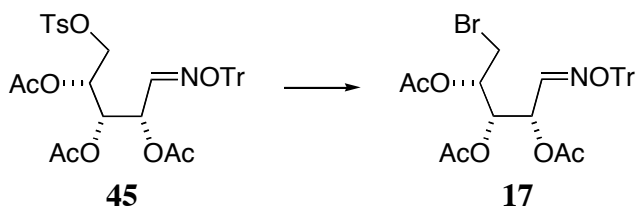

DMF (10 mL) was added to a stirred mixture of LiBr (dried at 100 °C, 140 mg, 1.55 mmol) and **45** (266 mg, 0.387 mmol). The solution was stirred for 8 h, Et<sub>2</sub>O (20 mL) was added, and the mixture was washed with water (4 x 10 mL). The ether extract was washed with water (2 x 10 mL), dried (MgSO<sub>4</sub>) and evaporated. Flash chromatography of the residue over silica gel (1.7 x 30 cm), using 15% EtOAc-hexane, gave **17** (198 mg, 86%) as a foam. The material, which was used with only partial characterization (<sup>1</sup>H NMR), appeared to be a single isomer: <sup>1</sup>H NMR (CDCl<sub>3</sub>, 300 MHz) δ 1.98 and 2.01 (two singlets, 9 H), 3.24-3.58 (m, 2 H), 5.01-5.16 (m, 1 H), 5.34-5.46 (m, 1 H), 5.48-5.51 (m, 1 H), 7.01-7.49 (m, 15 H), 7.52 (d, *J* = 7 Hz, 1 H).

The oxime geometry was not determined.

**5-Bromo-5-deoxy-2,3,4-tris-*O*-(phenylmethyl)-D-ribose *O*-(Triphenylmethyl)oxime (19).**

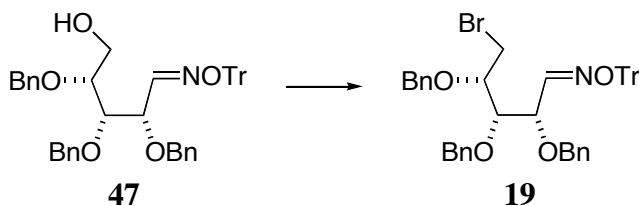

Ph<sub>3</sub>P (90 mg, 0.34 mmol) was added to a stirred and cooled (ice-water) solution of **47** (115 mg, 0.169 mmol) in pyridine (5 mL), and then CBr<sub>4</sub> (70 mg, 0.2 mmol) was added in one portion. The mixture was heated at 65 °C for 2 h, cooled, and diluted with MeOH (5 mL). Evaporation of the solvent, and flash chromatography of the residue over silica gel (1.7 x 20 cm), using 10% EtOAc-hexane, gave **19** (109 mg, 86%) as a foam, which was a 6:1 mixture of isomers (<sup>1</sup>H NMR): FTIR (CH<sub>2</sub>Cl<sub>2</sub> cast) 3060, 3030, 2866, 1958, 1597 cm<sup>-1</sup>; <sup>1</sup>H NMR (CDCl<sub>3</sub>, 400 MHz) δ 3.34-3.43 (m, 1 H), 3.53-3.74 (m, 2 H), 3.79-4.08 (m, 2 H), 4.19-5.30 (m including several AB q, 6 H), 6.88 (d, *J* = 7 Hz, 0.13 H), 7.22-7.46 (m, 30 H), 7.68 (d, *J* = 7 Hz, 0.77 H); <sup>13</sup>C NMR (CDCl<sub>3</sub>, 100.6 MHz) δ 33.6 (t), 33.7 (t), 70.7 (t), 71.71 (d), 71.73 (t), 72.2 (t), 72.5 (t), 73.4 (t), 74.7 (t), 76.5 (d), 77.1 (d), 77.2 (d), 79.8 (d), 80.8 (d), 90.8 (s), 127.1 (d), 127.2 (d), 127.5 (d), 127.6 (d), 127.64 (d), 127.7 (d), 127.75 (d), 127.81 (d), 127.85 (d), 127.9 (d), 128.11 (d), 128.17 (d), 128.2 (d), 128.3 (d), 128.31 (d), 128.35 (d), 128.4 (d), 129.1 (d), 129.2 (d), 129.3 (d), 137.5 (s), 137.6 (s), 138.1 (s), 144.1 (s), 144.3 (s), 149.3 (d); exact mass (electrospray) *m/z* calcd for C<sub>45</sub>H<sub>42</sub><sup>79</sup>BrNNaO<sub>4</sub> 762.2194, found 762.2183.

**[2*S*-(2α,3α,4α)]-2,3,4-Tris(phenylmethoxy)cyclopentanone Oxime (20).**

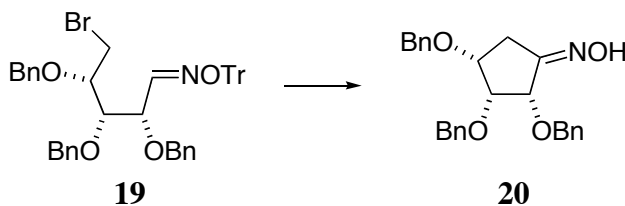

General procedure A for radical cyclization was followed, using **19** (260 mg, 0.351 mmol) in THF (25 mL), Bu<sub>3</sub>SnH (0.21 mL, 0.702 mmol) in THF (5 mL), ABC (5 mg, 0.02 mmol) in THF (5 mL), and *i*-Pr<sub>2</sub>NEt (90 mg, 0.71 mmol). As a considerable amount of starting material was present after the arbitrary reflux period (TLC control), further portions of Bu<sub>3</sub>SnH (0.21 mL, 0.702 mmol) and ABC (5.9 mg, 0.024 mmol), each in THF (5 mL), were added slowly (10 h) as before. As a considerable amount of starting material was still present after the arbitrary reflux period (TLC control), further portions of Bu<sub>3</sub>SnH (0.21 mg, 0.702 mmol) and ABC (5 mg, 0.02 mmol), each in THF (5 mL), were added slowly (10 h) as before. Flash

chromatography of the residue over silica gel (1.7 x 20 cm), using 30% EtOAc-hexane, gave **20** (132 mg, 91%) as a crystalline solid, which was a mixture of *Z* and *E* isomers ( $^1\text{H}$  NMR): mp 145-147 °C; FTIR ( $\text{CH}_2\text{Cl}_2$  cast) 3228, 3087, 3062, 2869, 1495  $\text{cm}^{-1}$ ;  $^1\text{H}$  NMR ( $\text{CDCl}_3$ , 400 MHz)  $\delta$  2.48-2.92 [m, including a doublet of doublets at  $\delta$  2.54 (dd,  $J = 17.0$ , 6.3 Hz), 2 H in all], 3.76-3.97 [m, including a triplet at  $\delta$  3.8 ( $J = 4.6$  Hz), 2 H in all], 4.16 (d,  $J = 4$  Hz, 1 H), 4.53-4.84 (m, 6 H), 7.03-7.61 (m, 15 H), 7.78-8.87 (br s, 1 H);  $^{13}\text{C}$  NMR ( $\text{CDCl}_3$ , 100.6 MHz)  $\delta$  30.5 (t), 33.7 (t), 71.41 (t), 71.47 (t, shows only in expanded spectrum), 71.5 (t), 71.6 (t), 72.5 (t), 72.7 (t), 73.4 (d), 75.2 (d), 75.3 (d), 77.0 (d), 78.4 (d), 127.5 (d), 127.53 (d), 127.59 (d), 127.6 (d), 127.71 (d), 127.75 (d), 127.86 (d), 127.89 (d), 128.14 (d), 128.16 (d), 128.22 (d), 128.28 (d), 128.3 (d), 137.8 (s), 138.1 (s), 138.18 (s), 138.2 (s), 138.21 (s), 138.4 (s), 158.6 (s), 160.1 (s); exact mass  $m/z$  calcd for  $\text{C}_{26}\text{H}_{27}\text{NO}_4$  417.1940, found 417.1943.

***Trans*-2-[2-Bromocyclohexyl]oxy]acetaldehyde *O*-(Triphenylmethyl)oxime (**21**).**

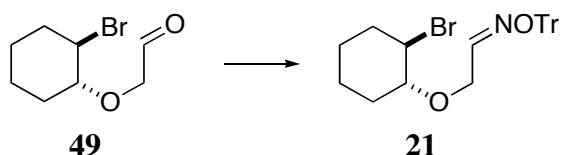

The general procedure for making *O*-trityl oximes was followed, using  $\text{TrONH}_2$  (651 mg, 2.37 mmol) and **49** (523 mg, 2.36 mmol) in THF (8 mL). Flash chromatography of the residue over silica gel (1.7 x 35 cm), using 5% EtOAc-hexane, gave **21** (1.06 g, 94%) as a foam, which was a 1:1 mixture of *Z* and *E* isomers ( $^1\text{H}$  NMR): FTIR ( $\text{CH}_2\text{Cl}_2$  cast) 3056, 3033, 2860, 1597, 1491  $\text{cm}^{-1}$ ;  $^1\text{H}$  NMR ( $\text{CD}_2\text{Cl}_2$ , 300 MHz)  $\delta$  1.10-1.43 (m, 3 H), 1.58-2.03 (m, 4 H), 2.11-2.41 (m, 1 H), 3.11-3.23 (m, 0.6 H), 3.34-3.43 (m, 0.46 H), 3.81-4.20 (m, 2 H), 4.64 (apparent t,  $J = 4$  Hz, 1 H), 6.98 (t,  $J = 5$  Hz, 0.5 H), 7.14-7.40 (m, 15 H), 7.69 (t,  $J = 5$  Hz, 0.5 H);  $^{13}\text{C}$  NMR ( $\text{CDCl}_3$ , 125.7 MHz)  $\delta$  23.3 (t), 25.49 (t), 25.5 (t), 25.51 (t), 31.0 (t), 35.6 (t), 35.7 (t), 55.1 (d), 55.3 (d), 64.6 (t), 66.2 (t), 80.7 (d), 82.5 (d), 90.7 (s), 91.0 (s), 127.0 (d), 127.2 (d), 127.4 (d), 127.5 (d), 128.8 (d), 129.1 (d), 129.2 (d), 144.1 (s), 144.2 (s), 147.8 (d), 151.1 (d); exact mass (electrospray)  $m/z$  calcd for  $\text{C}_{27}\text{H}_{28}^{79}\text{BrNNaO}_2$  500.1195, found 500.1199.

**Diethyl (2-Bromoethyl)[2-[(triphenylmethoxy)imino]ethyl]propanedioate (**22**).**

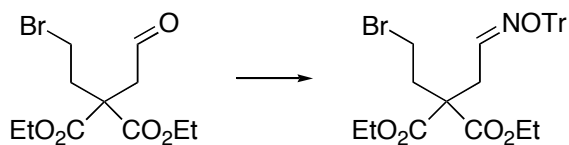

**51****22**

The general procedure for making *O*-trityl oximes was followed, using TrONH<sub>2</sub> (260 mg, 0.943 mmol) and **51** (290 mg, 0.943 mmol) in THF (10 mL). Flash chromatography of the residue over silica gel (1.7 x 30 cm), using 10% EtOAc-hexane, gave **22** (512 mg, 97%) as a foam, which was a mixture of *Z* and *E* isomers (<sup>1</sup>H NMR): FTIR (CH<sub>2</sub>Cl<sub>2</sub> cast) 3533, 3087, 2980, 2936, 1958, 1731, 1597 cm<sup>-1</sup>; <sup>1</sup>H NMR (CDCl<sub>3</sub>, 500 MHz) δ 1.17 (t, *J* = 7.0 Hz) and 1.22 (t, *J* = 7.0 Hz) (6 H in all), 2.24 (t, *J* = 8.0 Hz, 1.3 H), 2.44 (t, *J* = 8.0 Hz, 0.7 H), 2.73-2.80 (m, 1.3 H), 3.11-3.18 (m, 2 H), 3.30-3.38 (m, 0.72 H), 4.04-4.23 (m, 4 H), 6.71 (dt, *J* = 5.5, 0.8 Hz, 0.36 H), 7.19-7.32 (m, 15 H), 7.50 (dt, *J* = 6.0, 0.6 Hz, 0.8 H); <sup>13</sup>C NMR (CDCl<sub>3</sub>, 125.7 MHz) δ 14.0 (q), 14.1 (q), 26.7 (t), 26.9 (t), 30.1 (t), 33.2 (t), 35.9 (t), 37.2 (t), 55.9 (s or t), 56.2 (s or t), 61.9 (s or t), 62.1 (s or t), 90.7 (s), 91.1 (s), 127.10 (d), 127.13 (d), 127.5 (d), 127.8 (d), 128.9 (d), 129.0 (d), 144.1 (s), 144.2 (s), 145.9 (d), 146.0 (d), 169.5 (s), 169.6 (s); exact mass (electrospray) *m/z* calcd for C<sub>30</sub>H<sub>32</sub><sup>79</sup>BrNNaO<sub>5</sub> 588.1356, found 588.1361.

**Diethyl (2-Iodoethyl)[2-[(triphenylmethoxy)imino]ethyl]propanedioate (**23**).**

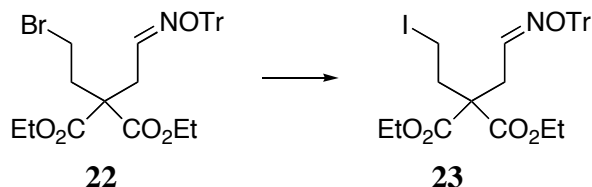

Bromide **22** (365 mg, 0.645 mmol) was added to a stirred solution of NaI (200 mg, 1.29 mmol) in dry acetone (10 mL), and the mixture was refluxed for 24 h and cooled. Saturated aqueous Na<sub>2</sub>S<sub>2</sub>O<sub>3</sub> was added to the mixture which was then extracted with Et<sub>2</sub>O (2 x 10 mL). The combined organic extracts were washed with brine (1 x 10 mL), dried (MgSO<sub>4</sub>), and evaporated. Flash chromatography of the residue over silica gel (1.7 x 30 cm), using 8% EtOAc-hexane, gave **23** (342 mg, 83%) as a foam, which was a 3.8:1 mixture of isomers (<sup>1</sup>H NMR): FTIR (CH<sub>2</sub>Cl<sub>2</sub> cast) 3532, 3057, 2979, 1958, 1730, 1597 cm<sup>-1</sup>; <sup>1</sup>H NMR (CDCl<sub>3</sub>, 500 MHz) δ 1.20 (t, *J* = 7.1 Hz), 1.24 (t, *J* = 7.1 Hz) (6 H in all), 2.31-2.98 (m, 5 H), 3.03-3.18 (m, 1 H), 4.01-4.23 (m, 4 H), 6.71 (t, *J* = 5 Hz, 0.18 H), 7.21-7.35 (m, 15 H), 7.49 (t, *J* = 5 Hz, 0.70 H); <sup>13</sup>C NMR (CDCl<sub>3</sub>, 125.7 MHz) δ -3.0 (t), -2.8 (t), 13.95 (q), 13.98 (q), 29.7 (s or t), 32.9 (s or t), 37.5 (s or t), 38.7 (s or t), 57.3 (s or t), 57.6 (s or t), 61.8 (s or t), 61.9 (s or t), 90.7 (s), 91.1 (s), 127.1 (d), 127.20 (d), 127.58 (d), 127.64 (d), 129.0 (d), 129.1 (d), 144.2 (s), 146.0 (d), 146.1 (d), 146.9 (s), 169.5 (s), 169.6 (s); exact mass (electrospray) *m/z* calcd for C<sub>30</sub>H<sub>32</sub>INNaO<sub>5</sub> 636.1222, found 636.1228.

**(1-Bromomethyl)-4-[(Triphenylmethoxy)imino]butyl Acetate (24).**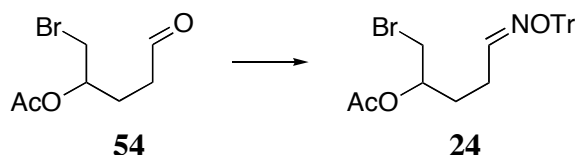

The general procedure for making *O*-trityl oximes was followed, using TrONH<sub>2</sub> (335 mg, 1.22 mmol) and **54** (272 mg, 1.22 mmol) in THF (10 mL). Flash chromatography of the residue over silica gel (1.7 x 32 cm), using 10% EtOAc-hexane, gave **24** (571 mg, 98%) as a foam, which was a 1:1 mixture of *Z* and *E* isomers (<sup>1</sup>H NMR): FTIR (CH<sub>2</sub>Cl<sub>2</sub> cast) 3057, 3023, 2928, 1958, 1741, 1596 cm<sup>-1</sup>; <sup>1</sup>H NMR (CD<sub>2</sub>Cl<sub>2</sub>, 300 MHz) δ 1.71-1.85 (m, 1 H), 1.89-2.09 (m including two s, 4 H), 2.11-2.31 (m, 1 H), 2.44-2.72 (m, 1 H), 3.23-3.34 (m, 1 H), 3.42-3.59 (m, 1 H), 4.78-5.10 (m, 1 H), 6.78 (t, *J* = 6 Hz, 0.5 H), 7.11-7.42 (m, 15 H), 7.60 (t, *J* = 6 Hz, 0.5 H); <sup>13</sup>C NMR (CDCl<sub>3</sub>, 100.6 MHz) δ 20.8 (q), 20.9 (q), 22.2 (t), 25.4 (t), 28.82 (t), 28.83 (t), 33.3 (t), 33.8 (t), 71.3 (d), 71.9 (d), 90.4 (s), 90.6 (s), 126.96 (d), 127.1 (d), 127.4 (d), 127.9 (d), 128.9 (d), 129.1 (d), 144.3 (s), 144.4 (s), 149.3 (d), 150.1 (d), 170.1 (s); exact mass (electrospray) *m/z* calcd for C<sub>26</sub>H<sub>26</sub><sup>79</sup>BrNNaO<sub>3</sub> 502.0993, found 502.0993.

***Trans*-[(2-Iodocyclohexyl)oxy]acetaldehyde *O*-(Triphenylmethyl)oxime (25). (a)**  
***Trans*-[(2-Iodocyclohexyl)oxy]acetaldehyde.**

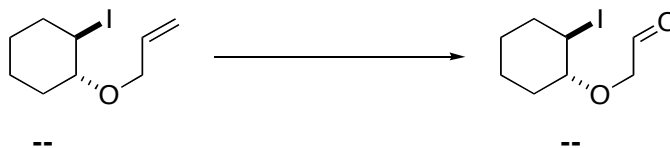

O<sub>3</sub> was bubbled through a stirred and cooled (-78 °C) solution of alkene *trans*-1-(allyloxy)-2-iodocyclohexane<sup>28,29</sup> (504 mg, 1.90 mmol) in CH<sub>2</sub>Cl<sub>2</sub> (10 mL) for 1 h and the mixture was then flushed with O<sub>2</sub> for 0.5 h at -78 °C. Ph<sub>3</sub>P (1.49 g, 5.68 mmol) was tipped in, the cold bath was removed and the mixture was stirred overnight. Evaporation of the solvent and flash chromatography of the residue over silica gel (3 x 20 cm), using 30% EtOAc-hexane, gave *trans*-[(2-iodocyclohexyl)oxy]acetaldehyde (280 mg, 59%) as a colorless oil: FTIR (CH<sub>2</sub>Cl<sub>2</sub> cast) 2934, 2857, 1735, 1446 cm<sup>-1</sup>; <sup>1</sup>H NMR (CDCl<sub>3</sub>, 400 MHz) 1.21-1.42 (m, 3 H), 1.49-1.59 (m, 1 H), 1.78-1.87 (m, 1 H), 1.91-2.03 (m, 1 H), 2.09-2.20 (m, 1 H), 2.38-2.48 (m, 1 H), 3.39 (ddd, *J* = 9.2, 9.2, 4.4 Hz, 1 H), 4.07 (ddd, *J* = 13.1, 8.9, 4.3 Hz, 1 H), 4.10 (s, 2 H), 9.79 (t, *J* =

1.1 Hz, 1 H);  $^{13}\text{C}$  NMR ( $\text{CDCl}_3$ , 100.6 MHz)  $\delta$  23.4 (t), 26.9 (t), 31.1 (t), 34.4 (d), 37.8 (t), 75.0 (t), 83.9 (d), 201.0 (d); exact mass  $m/z$  calcd for  $\text{C}_6\text{H}_{10}\text{IO}$  ( $\text{M} - \text{C}_2\text{H}_3\text{O}$ ) 224.97765, found 224.97771.

**(b) *Trans*-[(2-Iodocyclohexyl)oxy]acetaldehyde *O*-(Triphenylmethyl)oxime (**25**).**

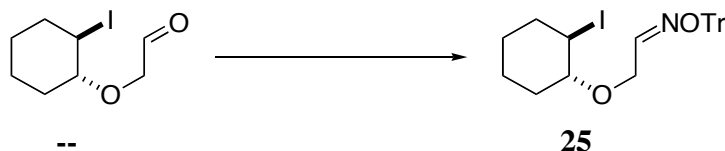

$\text{TrONH}_2$  (103 mg, 0.373 mmol) was added in one portion to a stirred solution of *trans*-[(2-iodocyclohexyl)oxy]acetaldehyde (100 mg, 0.373 mmol) in dry  $\text{CH}_2\text{Cl}_2$  (5 mL) and the mixture was refluxed overnight. Evaporation of the solvent and flash chromatography of the residue over silica gel (3 x 20 cm), using 20% EtOAc-hexane, gave **25** (200 mg, 100%) as an oil, which was a mixture (ca 1:1) of *Z* and *E* isomers ( $^1\text{H}$  NMR): FTIR ( $\text{CH}_2\text{Cl}_2$  cast) 3086, 3056, 3022, 2935, 2858, 1954, 1811, 1491, 1447, 699;  $^1\text{H}$  NMR ( $\text{CDCl}_3$ , 400 MHz)  $\delta$  1.05-2.24 (m, 7 H), 2.29-2.48 (m, 1 H), 3.15 (ddd,  $J = 8.9, 8.9, 4.5$  Hz, 1 H), 3.39 (ddd,  $J = 8.9, 8.9, 4.3$  Hz, 1 H), 3.86-4.21 (m, 2 H), 4.52-4.68 (m, 1 H), 7.05 (t,  $J = 3.6$  Hz, 0.5 H), 7.17-7.40 (m, 15 H), 7.75 (t,  $J = 5.9$  Hz, 0.5 H);  $^{13}\text{C}$  NMR ( $\text{CDCl}_3$ , 100.6 MHz)  $\delta$  23.5 (t), 27.06 (t), 27.12 (t), 31.0 (t), 31.1 (t), 34.7 (d), 35.1 (d), 37.87 (t), 37.89 (t), 64.2 (t), 65.8 (t), 81.3 (d), 83.2 (d), 90.7 (s), 90.9 (s), 127.0 (d), 127.2 (d), 127.5 (d), 127.6 (d), 128.9 (d), 129.1 (d), 144.2 (s), 146.8 (s), 147.9 (d), 151.1 (d); exact mass (electrospray)  $m/z$  calcd for  $\text{C}_{27}\text{H}_{28}\text{INO}_2$  548.10570, found 548.10578.

**2-(2-Bromoethoxy)benzaldehyde *O*-(Diphenylmethyl)oxime (**26**).**

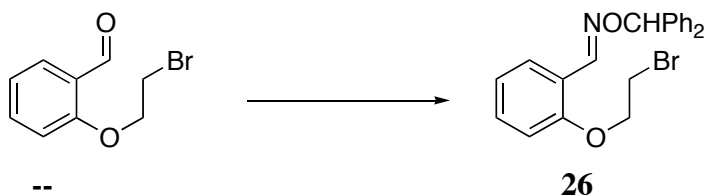

$\text{Ph}_2\text{CHONH}_2^{30}$  (0.0868g, 0.436 mmol) in THF (6 mL) was added dropwise to a stirred solution of 2-(2-bromoethoxy)benzaldehyde<sup>17</sup> (100.0 mg, 0.436 mmol) in THF (2 mL), and the mixture was heated at 65 °C for 4 h. Evaporation of the solvent and flash chromatography of the residue over silica gel (2 x 30 cm), using 10% EtOAc-hexane, gave **26** (176 mg, 98%) as an oil which was a single isomer ( $^1\text{H}$  NMR): FTIR ( $\text{CH}_2\text{Cl}_2$  cast) 3061, 3029, 1601, 1451, 1249  $\text{cm}^{-1}$ ;



$^1\text{H}$  NMR ( $\text{CDCl}_3$ , 400 MHz)  $\delta$  3.64 (t,  $J$  = 6.2 Hz, 2 H), 4.32 (t,  $J$  = 6.2 Hz, 2 H), 6.36 (s, 1 H), 6.80-6.98 (m, 2 H), 7.22-7.44 (m, 11 H), 7.70-7.77 (m, 1 H), 8.67 (s, 1 H);  $^{13}\text{C}$  NMR ( $\text{CDCl}_3$ , 100.6 MHz)  $\delta$  28.9 (t), 68.2 (t), 86.8 (d), 112.3 (d), 121.2 (s), 121.4 (d), 126.7 (d), 127.47 (d), 127.5 (d), 128.3 (d), 131.0 (d), 141.2 (s), 145.1 (d), 155.9 (s); exact mass  $m/z$  calcd for  $\text{C}_{22}\text{H}_{20}^{79}\text{BrNO}_2$  409.06775, found 409.06671.

***O*-(Diphenylmethyl)-*N*-(chroman-4-yl)hydroxylamine (**27**).**

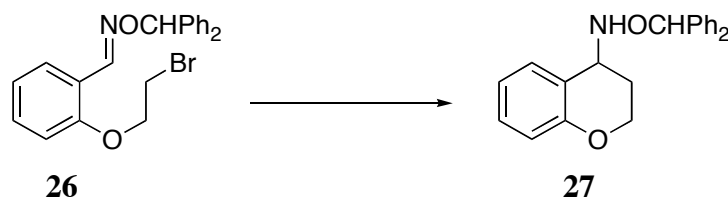

General procedure A for radical cyclization was followed, using **26** (67.6 mg, 0.165 mmol) in THF (20 mL),  $\text{Bu}_3\text{SnH}$  (0.18 mL, 0.669 mmol) in THF (2 mL), ABC (0.0041 mg, 0.0017 mmol) in THF (2 mL), and  $i\text{-Pr}_2\text{NEt}$  (0.144 mL, 0.83 mmol). Evaporation of the solvent and flash chromatography of the residue over silica gel (2 x 30 cm), using 5% EtOAc-hexane, gave hydroxylamine **27** (13.2 mg, 49%) as an oil: FTIR ( $\text{CH}_2\text{Cl}_2$  cast) 3257, 3061, 3029, 2883, 1951, 1904, 1808, 1608, 1584, 1489, 1454  $\text{cm}^{-1}$ ;  $^1\text{H}$  NMR ( $\text{CDCl}_3$ , 400 MHz)  $\delta$  1.95-2.07 (m, 1 H), 2.22 (dddd,  $J$  = 14.2, 3.0, 3.0, 3.0 Hz, 1 H), 4.12-4.29 (m, 3 H), 5.30-6.0 (br signal containing s at  $\delta$  5.73, 2 H in all), 6.74-6.90 (m, 2 H), 7.10-7.20 (m, 2 H), 7.22-7.42 (m, 10 H);  $^{13}\text{C}$  NMR ( $\text{CDCl}_3$ , 100.6 MHz)  $\delta$  25.7 (t), 53.7 (d), 62.0 (t), 87.4 (d), 117.0 (d), 119.8 (s), 120.1 (d), 127.2 (d), 127.4 (d), 127.60 (d), 127.65 (D), 128.3 (d), 128.4 (d), 129.3(d), 130.3 (d), 141.3 (s), 141.4 (s), 155.7 (s); exact mass (electrospray)  $m/z$  calcd for  $\text{C}_{22}\text{H}_{22}\text{NO}_2$  ( $M + H$ ) 332.16451, found 332.16431.

***Cis*-Hexahydrobenzofuran-3(2*H*)-one oxime (**28**).**

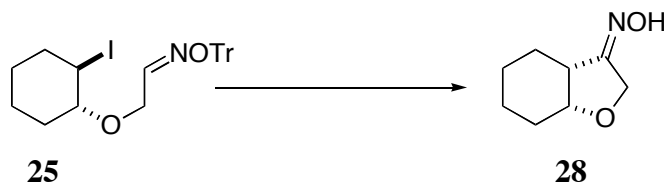

General procedure B for radical cyclization was followed, using **25** (180 mg, 0.343 mmol),  $\text{PhSeSePh}$  (24.0 mg, 0.077 mmol) and Hünig's base (0.26 mL, 1.49 mmol) in THF (20 mL),  $\text{Bu}_3\text{SnH}$  (0.165 mL, 0.613 mmol) in THF (5 mL) and ABC (92.0 mg, 0.377 mmol) in THF

(5 mL). After evaporation of the solvent, flash chromatography of the residue over silica gel (2 x 20 cm), using 20% EtOAc-hexane, gave **28** (4.9 mg, 91%) as an oil which was a mixture (ca 1:2.4) of geometric isomers ( $^1\text{H}$  NMR): FTIR ( $\text{CH}_2\text{Cl}_2$ , cast) 2934, 2857  $\text{cm}^{-1}$ ;  $^1\text{H}$  NMR ( $\text{CDCl}_3$ , 400 MHz)  $\delta$  1.10-2.11 (m, 8 H), 2.64 (ddd,  $J = 10.3, 5.7, 5.7$  Hz, 0.7 H), 3.04 (ddd,  $J = 10.9, 5.1, 5.1$  Hz, 0.3 H), 3.91 (ddd,  $J = 3.7, 3.7, 3.7$  Hz, 0.3 H), 4.03 (ddd,  $J = 4.5, 4.5, 4.5$  Hz, 0.7 H), 4.15-4.66 (two overlapping m, 2 H), 8.38 (s, 0.3 H), 8.54 (s, 0.7 H);  $^{13}\text{C}$  NMR ( $\text{CDCl}_3$ , 100.6 MHz)  $\delta$  20.0 (t), 20.5 (t), 22.95 (t), 23.02 (t), 23.7 (t), 25.5 (t), 27.25 (t), 27.26 (t), 38.8 (d), 40.6 (d), 65.2 (t), 67.0 (t), 77.2 (d), 77.4 (d), 166.3 (s), 166.5 (s); exact mass  $m/z$  calcd for  $\text{C}_8\text{H}_{13}\text{NO}_2$  155.09464, found 155.09474.

**5-Iodopentanal *O*-(Triphenylmethyl)oxime (29).**

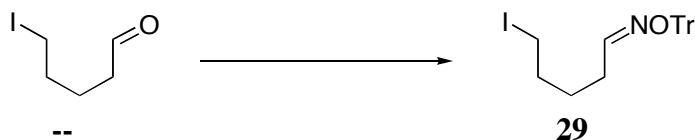

$\text{TrONH}_2$  (460 mg, 1.673 mmol) was added to a solution of 5-iodopentanal<sup>18,19,20</sup> (355 mg, 1.675 mmol) in  $\text{CH}_2\text{Cl}_2$  (15 mL) and the mixture was refluxed for 1 h. Evaporation of solvent and flash chromatography of the residue over silica gel (2 x 20 cm), using 20% EtOAc-hexane, gave **29** (694 mg, 89%) as an oil, which was a mixture of two isomers. The isomers were separated by preparative tlc (silica, 3% EtOAc-hexane, plate developed twice): FTIR ( $\text{CH}_2\text{Cl}_2$ , cast, isomer mixture) 3056, 2930, 1953, 1813, 1596, 1447, 699  $\text{cm}^{-1}$ ;  $^1\text{H}$  NMR ( $\text{CDCl}_3$ , 400 MHz) (less polar isomer, presumably *E*-isomer)  $\delta$  1.45-1.54 (m, 2 H), 1.58-1.67 (m, 2 H), 2.15 (ddd,  $J = 7.0, 6.1, 6.1$  Hz, 2 H), 3.03 (t,  $J = 6.8$  Hz, 2 H), 7.20-7.38 (m, 15 H), 7.54 (t,  $J = 5.9$  Hz, 1 H);  $^1\text{H}$  NMR ( $\text{CDCl}_3$ , 400 MHz) (more polar isomer, presumably *Z*-isomer)  $\delta$  1.60-1.70 (m, 2 H), 1.82-1.92 (m, 2 H), 2.56 (ddd,  $J = 7.6, 7.6, 5.4$  Hz, 2 H), 3.18 (t,  $J = 6.9$  Hz, 2 H), 6.72 (t,  $J = 5.5$  Hz, 1 H), 7.20-7.38 (m, 15 H);  $^{13}\text{C}$  NMR ( $\text{CDCl}_3$ , 100.6 MHz) (less polar isomer)  $\delta$  6.4 (t), 26.8 (t), 28.1 (t), 31.9 (t), 90.2 (s), 126.9 (d), 127.4 (d), 129.1 (d), 144.4 (s), 150.2 (d);  $^{13}\text{C}$  NMR ( $\text{CDCl}_3$ , 100.6 MHz) (more polar isomer)  $\delta$  6.0 (t), 25.1 (t), 26.9 (t), 32.9 (t), 90.3 (s), 127.0 (d), 127.5 (d), 128.9 (d), 144.5 (s), 151.2 (d); exact mass (electrospray) (less polar isomer)  $m/z$  calcd for  $\text{C}_{24}\text{H}_{24}\text{INNaO}$  492.07949, found 492.07974; exact mass (electrospray) (more polar isomer)  $m/z$  calcd for  $\text{C}_{24}\text{H}_{24}\text{INNaO}$  492.07949, found 492.07961.

**Acetic Acid 1-(Iodomethyl)-4-[(triphenylmethyloxy)imino]butyl Ester (30). (a)**  
**Acetic Acid (1-Iodomethyl)pent-4-enyl Ester.**

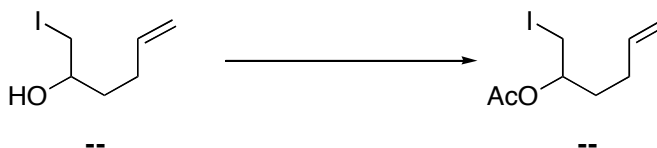

Ac<sub>2</sub>O (2.6 mL, 27.41 mmol) and then pyridine (2.22 mL, 27.41 mmol) were added successively to a stirred and cooled (0 °C) portion of 1-iodohex-5-en-2-ol<sup>31</sup> (774 mg, 3.426 mmol). Stirring at 0 °C was continued for 4 h, the ice bath was left in place, but not recharged, and stirring was continued overnight. The solution was diluted with water, extracted with Et<sub>2</sub>O, and washed with saturated aqueous NaHCO<sub>3</sub>, water and brine. The combined organic extracts were dried (Na<sub>2</sub>SO<sub>4</sub>) and evaporated. Flash chromatography of the residue over silica gel (2 x 30 cm), using 30% EtOAc-hexane, gave acetic acid (1-iodomethyl)pent-4-enyl ester (763.9 mg, 83%) as an oil: FTIR (CH<sub>2</sub>Cl<sub>2</sub>, cast) 2924, 1740, 1235, 914; <sup>1</sup>H NMR (CDCl<sub>3</sub>, 400 MHz) δ 1.68-1.80 (m, 2 H), 2.03-2.14 (m including s at δ at 2.08, 5 H), 3.29 (dddd, *J* = 10.6, 10.6, 10.6, 5.1 Hz, 2 H), 4.70 (dddd, *J* = 10.9, 5.1, 5.1, 5.1 Hz, 1 H), 4.94-5.06 (m, 2 H), 5.76 (dddd, *J* = 16.9, 10.2, 6.6, 6.6 Hz, 1 H); <sup>13</sup>C NMR (CDCl<sub>3</sub>, 100.6 MHz) δ 8.1 (t), 21.0 (q), 29.3 (t), 33.3 (t), 71.7 (d), 115.5 (t), 137.0 (d), 170.3 (s); exact mass (electrospray) *m/z* calcd for C<sub>8</sub>H<sub>13</sub>INaO<sub>2</sub> 290.98525, found 290.98494.

**(b) Acetic Acid 1-(Iodomethyl)-4-oxobutyl Ester.**

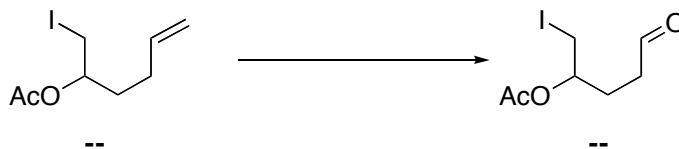

OsO<sub>4</sub> (0.1 M in PhMe, 2.85 mL, 0.285 mmol) was added in one portion to a stirred solution of acetic acid (1-iodomethyl)pent-4-enyl ester (763.9 mg, 2.85 mmol) in water (7 mL) and dioxane (21 mL). The solution was stirred at room temperature under Ar for 20 min. Then NaIO<sub>4</sub> was added in small portions over 20 min. The mixture was stirred at room temperature for an additional 2 h, quenched with water and extracted with EtOAc. The combined organic extracts were washed with brine and dried (MgSO<sub>4</sub>). Evaporation of solvent and flash chromatography of the residue over silica gel (2 x 20 cm), using 30% EtOAc-hexane, gave acetic acid 1-(iodomethyl)-4-oxobutyl ester (614 mg, 79%) as an oil: FTIR (CH<sub>2</sub>Cl<sub>2</sub>, cast) 2830, 1734, 1720, 1235 cm<sup>-1</sup>; <sup>1</sup>H NMR (CDCl<sub>3</sub>, 400 MHz) δ 1.80-2.20 (m including s at δ 2.05, 5 H), 2.42-2.54 (m, 2 H), 3.29 (dddd, *J* = 10.7, 10.7, 10.7, 5.4 Hz, 2 H), 4.73 (dddd, *J* = 5.3, 5.3, 4.2, 4.2 Hz, 1 H), 9.75 (t, *J* = 1.2 Hz, 1 H); <sup>13</sup>C NMR (CDCl<sub>3</sub>, 100.6 MHz) δ 7.1 (t), 20.8 (q), 26.5 (t), 39.4

(t), 71.4 (d), 170.1 (s), 200.4 (d); exact mass (electrospray)  $m/z$  calcd for  $C_7H_{11}INaO_3$  292.96452, found 292.96427.

**(c) Acetic Acid 1-(Iodomethyl)-4-[(triphenylmethyloxy)imino]butyl Ester (30).**

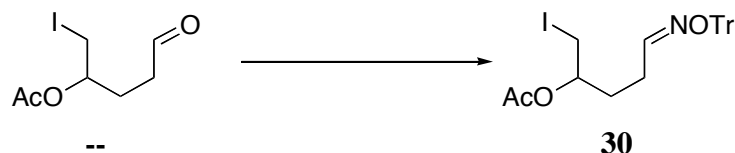

TrONH<sub>2</sub> (623 mg, 2.265 mmol) was added to a stirred solution of acetic acid 1-(iodomethyl)-4-oxobutyl ester (611.4 mg, 2.265 mmol) in CH<sub>2</sub>Cl<sub>2</sub> (40 mL) and stirring was continued for 1 h (Ar atmosphere). Evaporation of the solvent and flash chromatography of the residue over silica gel (2 x 30 cm), using 15% EtOAc-hexane, gave **30** (892.8 mg, 75%) as a mixture (ca 1:1) of *Z* and *E* isomers (<sup>1</sup>H NMR): FTIR (CH<sub>2</sub>Cl<sub>2</sub>, cast) 3057, 1740, 1233, 700 cm<sup>-1</sup>; <sup>1</sup>H NMR (CDCl<sub>3</sub>, 400 MHz) (the spectrum of the isomer mixture is too complicated to be informative); one isomer had: δ 1.74 (ddd, *J* = 7.0, 7.0, 7.0 Hz, 2 H), 2.05 (s, 3 H), 2.17 (ddd, *J* = 7.0, 7.0, 7.0 Hz, 2 H), 3.01-3.20 (m, 2 H), 4.51 (dddd, *J* = 5.8, 5.8, 5.8, 5.8 Hz, 1 H), 7.10-7.48 (m, 15 H), 7.55 (t, *J* = 5.1 Hz, 1 H); <sup>13</sup>C NMR (CDCl<sub>3</sub>, 100.6 MHz) (isomer mixture) δ 7.3 (t), 8.1 (t), 21.01 (q), 21.04 (q), 22.3 (t), 25.5 (t), 29.7 (t), 30.5 (t), 30.7 (t), 71.3 (d), 72.0 (d), 90.5 (s), 90.7 (s), 127.1 (d), 127.2 (d), 127.5 (d), 127.6 (d), 127.9 (d), 129.0 (d), 129.2 (d), 144.4 (s), 144.5 (s), 149.4 (d), 150.3 (d), 170.1 (s), 170.2 (s); exact mass (electrospray)  $m/z$  calcd for C<sub>26</sub>H<sub>26</sub>INNaO<sub>3</sub> 550.08497, found 550.08463.

**6-Iodoheptanal *O*-(Triphenylmethyl)oxime (32).**

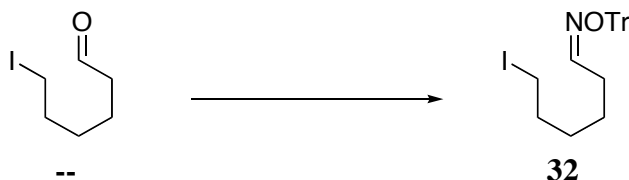

TrONH<sub>2</sub> (426 mg, 1.549 mmol) was added to a stirred solution of 6-iodoheptanal<sup>18,19,20</sup> (350 mg, 1.549 mmol) in CH<sub>2</sub>Cl<sub>2</sub> (20 mL) and stirring was continued for 2 h (Ar atmosphere). Evaporation of the solvent and flash chromatography of the residue over silica gel (3 x 30 cm), using 30% EtOAc-hexane, gave **32** (684.1 mg, 91%) as an oil, which was a mixture of two isomers (<sup>1</sup>H NMR). These could be separated but only the less polar was obtained pure, and the

isomer mixture was used for radical cyclization: FTIR (CH<sub>2</sub>Cl<sub>2</sub>, cast) (isomer mixture) 2930, 1597, 699 cm<sup>-1</sup>; <sup>1</sup>H NMR (CDCl<sub>3</sub>, 400 MHz) (less polar isomer)  $\delta$  1.20-1.50 (m, 4 H), 1.73 (quintet,  $J$  = 7.2 Hz, 2 H), 2.15 (q,  $J$  = 7.0 Hz, 2 H), 3.09 (t,  $J$  = 7.0 Hz, 2 H), 7.20-7.40 (m, 15 H), 7.57 (t,  $J$  = 5.9 Hz, 1 H); <sup>13</sup>C NMR (CDCl<sub>3</sub>, 100.6 MHz) (less polar isomer)  $\delta$  6.8 (t), 25.3 (t), 29.2 (t), 29.5 (t), 33.2 (t), 90.2 (s), 127.0 (d), 127.5 (d), 129.2 (d), 144.6 (s), 150.8 (d); exact mass (electrospray)  $m/z$  calcd for C<sub>25</sub>H<sub>26</sub>INNaO 506.09514, found 506.09458.

### Cyclohexanone Oxime (**33**).<sup>25</sup>

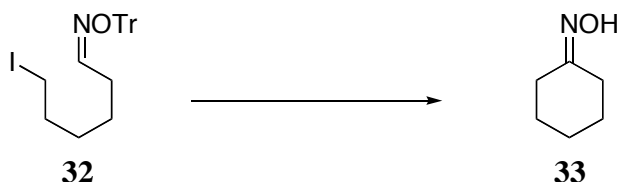

General procedure B for radical cyclization was followed using **32** (666 mg, 1.379 mmol), PhSeSePh (86.0 mg, 0.276 mmol) and Hünig's base (0.96 mL, 5.511 mmol) in THF (25 mL), Bu<sub>3</sub>SnH (2.066 mmol) in THF (8 mL) and ABC (336 mg, 1.375 mL) in THF (8 mL). After evaporation of the solvent, flash chromatography of the residue over silica gel (2 x 30 cm), using 30% EtOAc-hexane, gave cyclohexanone oxime (**33**)<sup>25</sup> (136 mg, 87%).

### 3-(Hydroxyimino)cyclopentane-1,1-dicarboxylic Acid Diethyl Ester (**34**) (from **22**).

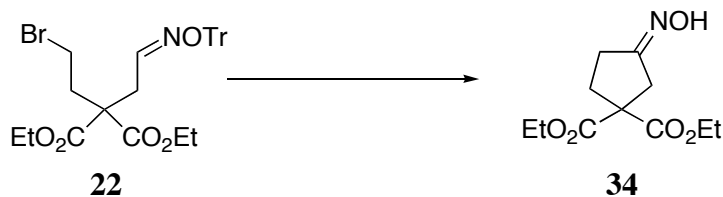

General procedure B for radical cyclization was followed, using **22** (110 mg, 0.194 mmol), PhSeSePh (12.2 mg, 0.0391 mmol) and Hünig's base (0.1 mL, 0.776 mmol) in dry THF (20 mL), Bu<sub>3</sub>SnH (0.063 mL, 0.234 mmol) in THF (3 mL) and ABC (47.5 mg, 0.194 mmol) in THF (3 mL). After evaporation of the solvent, flash chromatography of the residue over silica gel (2 x 30 cm), using 30% EtOAc-hexane, gave **34** (36.4 mg, 77%) as a mixture (ca 1:1) of *Z* and *E* isomers, identical with material made from the iodide.

### 3-(2-Iodocyclopentyl)propanal *O*-(Triphenylmethyl)oxime (**35**).

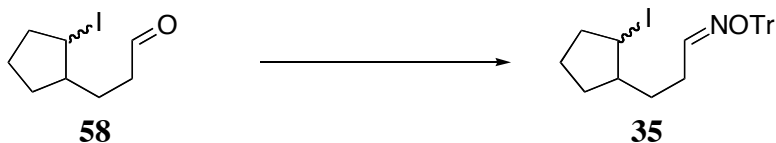

TrONH<sub>2</sub> (51.0 mg, 0.186 mmol) was added in one portion to a stirred solution of **58** (probably largely one isomer) (47.0 mg, 0.187 mmol) in dry CH<sub>2</sub>Cl<sub>2</sub> (3 mL) and stirring was continued for 1 h. Evaporation of the solvent and flash chromatography of the residue over silica gel (1.5 x 25 cm), using 10% EtOAc-hexane, gave **35** (77.8 mg, 82%) as an oil, which was a mixture (1:1.3) of isomers (<sup>1</sup>H NMR): FTIR (CH<sub>2</sub>Cl<sub>2</sub>, cast) 2954, 2922, 1954, 1887, 1811, 1631, 1448, 700 cm<sup>-1</sup>; <sup>1</sup>H NMR (CDCl<sub>3</sub>, 400 MHz) δ 0.6-2.80 (m, 11 H), 4.31 (t, *J* = 4.3 Hz, 0.5 H), 4.52 (t, *J* = 4.3 Hz, 0.5 H), 6.75 (t, *J* = 5.6 Hz, 0.42 H), 7.16-7.44 (m, 15 H), 7.57 (t, *J* = 6.1 Hz, 0.57 H); <sup>13</sup>C NMR (CDCl<sub>3</sub>, 100.6 MHz) δ 21.6 (t), 21.8 (t), 24.8 (t), 27.9 (t), 28.7 (t), 29.0 (t), 33.205 (t), 33.213 (t), 38.9 (t), 44.3 (d), 45.1 (d), 45.2 (d), 46.4 (d), 90.2 (s), 90.4 (s), 127.0 (d), 127.1 (d), 127.5 (d), 127.6 (d), 129.0 (d), 129.2 (d), 144.56 (s), 144.58 (s), 150.5 (d), 151.6 (d). A satisfactory mass spectrum could not be obtained by electron impact or electrospray methods.

**3-[(1-Iodomethyl)cyclohexyl]propanal *O*-(Triphenylmethyl)oxime (**37**).**

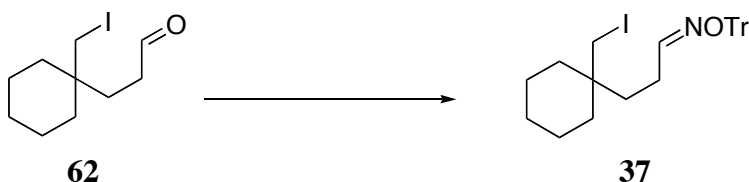

TrONH<sub>2</sub> (610 mg, 2.22 mmol) was added in one portion to a stirred solution of **62** (620 mg, 2.22 mmol) in dry CH<sub>2</sub>Cl<sub>2</sub> (22 mL) containing 4Å molecular sieves. Stirring was continued for 4 h and the mixture was filtered and evaporated. Flash chromatography of the residue over silica gel (3 x 30 cm), using 10% EtOAc-hexane, gave **37** (1.12 g, 94%) as a mixture (1:1.3) of geometric isomers (<sup>1</sup>H NMR): FTIR (neat film, microscope) 2926, 2853, 1953, 1886, 1810, 1723, 1449, 699 cm<sup>-1</sup>; <sup>1</sup>H NMR (CDCl<sub>3</sub>, 400 MHz) δ 1.30-1.60 (m, 12 H), 2.0-2.10 (m, 1.43 H), 2.38-2.50 (m, 0.64 H), 3.10 (s, 1.31 H), 3.25 (s, 0.63 H), 6.75 (t, *J* = 5.6 Hz, 0.29 H), 7.15-7.40 (m, 15 H), 7.56 (t, *J* = 6.1 Hz, 0.65 H); <sup>13</sup>C NMR (CDCl<sub>3</sub>, 100.6 MHz) δ 20.2 (t), 20.9 (t), 21.2 (t), 21.7 (t), 21.8 (t), 23.7 (t), 25.96 (t), 26.01 (t), 34.83 (s/t), 34.85 (s/t), 35.05 (s/t), 35.07 (s/t), 90.2 (s), 90.4 (s), 126.9 (d), 127.1 (d), 127.4 (d), 127.6 (d), 129.0 (d), 129.2 (d), 144.5 (s), 144.6 (s), 151.4 (d), 151.8 (d); exact mass (electrospray) *m/z* calcd for C<sub>29</sub>H<sub>32</sub>INNaO 560.14209, found 560.14210.

**3-(2-Iodophenyl)propanal *O*-(Triphenylmethyl)oxime (**39**).**

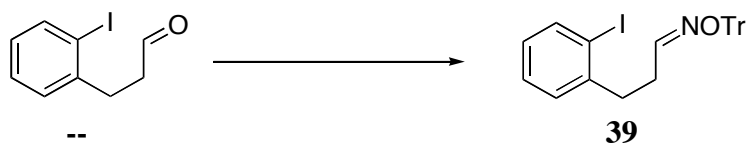

TrONH<sub>2</sub> (30 mg, 0.11 mmol) was added to a stirred solution of 3-(2-iodophenyl)propanal<sup>21</sup> (29.1 mg, 0.11 mmol) in dry CH<sub>2</sub>Cl<sub>2</sub> (2 mL) and stirring was continued for 2 h. Evaporation of the solvent and flash chromatography of the residue over silica gel (2 x 20 cm), using 10% EtOAc-hexane, gave **39** (0.054g, 94%) as an oil which was a mixture of *Z* and *E* isomers (<sup>1</sup>H NMR), containing some impurities; the material was used directly in the next step.

**2,3-*O*-(1-Methylethylidene)-D-ribose *O*-(Triphenylmethyl)oxime (**41**).**

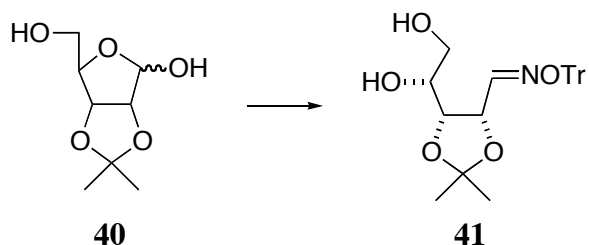

The general procedure for making *O*-trityl oximes was followed, using TrONH<sub>2</sub> (475.1 mg, 1.723 mmol) and 2,3-*O*-(1-methylethylidene)-D-ribose<sup>32</sup> (**40**) (298.4 mg, 1.571 mmol) in THF (10 mL). Flash chromatography of the residue over silica gel (1.7 x 35 cm), using 40% EtOAc-hexane, gave **41** (604 mg, 86%) as a foam, which was a 2.8:1 mixture of geometric isomers (<sup>1</sup>H NMR): FTIR (CH<sub>2</sub>Cl<sub>2</sub> cast) 3438, 3057, 3033, 2986, 2934, 1597 cm<sup>-1</sup>; <sup>1</sup>H NMR (CDCl<sub>3</sub>, 500 MHz) δ 1.28, 1.38, 1.45, 1.50 (four s, 6 H in all), 1.63-2.01 (br s, 2 H), 3.31-3.72 (m, 3 H), 3.97-4.02 (m, 0.86 H), 4.33-4.41 (m, 0.32 H), 4.64 (t, *J* = 7.0 Hz, 0.76 H), 5.45 (t, *J* = 7.0 Hz, 0.27 H), 6.92 (d, *J* = 6.4 Hz, 0.26 H), 7.18-7.38 (m, 15 H), 7.62 (d, *J* = 6.4 Hz, 0.73 H); <sup>13</sup>C NMR (CDCl<sub>3</sub>, 125.7 MHz) δ 25.4 (q), 25.6 (q), 27.6 (q), 27.8 (q), 64.0 (t), 64.2 (t), 69.6 (d), 70.4 (d), 72.2 (d), 75.3 (d), 78.4 (d), 79.1 (d), 91.3 (s), 92.5 (s), 110.1 (s), 110.5 (s), 127.2 (d), 127.3 (d), 127.6 (d), 127.7 (d), 128.8 (d), 129.0 (d), 143.4 (s), 143.8 (s), 150.5 (d), 150.7 (d); exact mass (electrospray) *m/z* calcd for C<sub>27</sub>H<sub>29</sub>NNaO<sub>5</sub> 470.1943, found 470.1942.

**5-Bromo-5-deoxy-2,3-*O*-(1-methylethylidene)-D-ribose *O*-(Triphenylmethyl)oxime (42).**

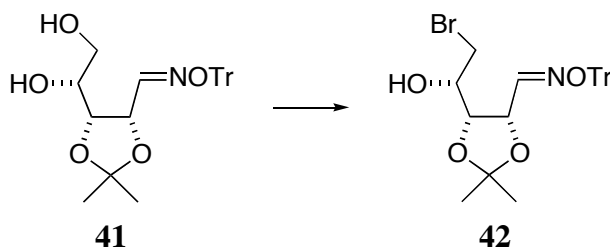

Ph<sub>3</sub>P (3.1 g, 11.7 mmol) was added to a stirred and cooled (ice-water) solution of **41** (2.6 g, 5.9 mmol) in pyridine (30 mL), and then CBr<sub>4</sub> (2.14 g, 6.45 mmol) was added in several portions at the same temperature. After the addition, the mixture was heated at 65 °C for 2 h, cooled, and diluted with MeOH (10 mL). Evaporation of the solvent, and flash chromatography of the residue over silica gel (4 x 32 cm), using 10% EtOAc-hexane, gave **42** (2.65 g, 89%) as a foam. The material was a single isomer, but the oxime geometry was not determined: FTIR (CH<sub>2</sub>Cl<sub>2</sub> cast) 3564, 3087, 3057, 3033, 2987, 2934, 1595, 1491 cm<sup>-1</sup>; <sup>1</sup>H NMR (CDCl<sub>3</sub>, 200 MHz) δ 1.30 (s, 3 H), 1.42 (s, 3 H), 1.92 (d, *J* = 6.0 Hz, 1 H), 3.33-3.61 (m, 3 H), 3.93-4.09 (m, 1 H), 4.72 (t, *J* = 6.0 Hz, 1 H), 7.21-7.51 (m, 15 H), 7.60 (d, *J* = 9.0 Hz, 1 H); <sup>13</sup>C NMR (CDCl<sub>3</sub>, 50.3 MHz) δ 25.5 (q), 27.7 (q), 36.8 (t), 68.8 (d), 75.1 (d), 79.1 (d), 91.2 (s), 110.5 (s), 127.3 (d), 127.8 (d), 128.9 (d), 143.9 (s), 149.8 (d); exact mass (electrospray) *m/z* calcd for C<sub>27</sub>H<sub>28</sub><sup>79</sup>BrNNaO<sub>4</sub> 532.1099, found 532.1100.

**D-Ribose *O*-(Triphenylmethyl)oxime (43).**

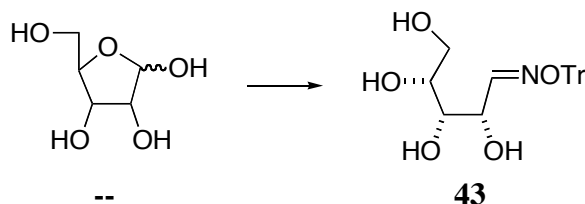

The general procedure for making *O*-trityl oximes was followed, using TrONH<sub>2</sub> (1.06 g, 3.86 mmol) and D-ribose (580 mg, 3.86 mmol) in THF (10 mL). Flash chromatography of the residue over silica gel (1.7 x 35 cm), using 80% EtOAc-hexane, gave **43** (1.438 g, 91%) as a foam. The material was used directly, without characterization.

**D-Ribose 5-(4-Methylbenzenesulfonate) *O*-(Triphenylmethyl)oxime (44).**



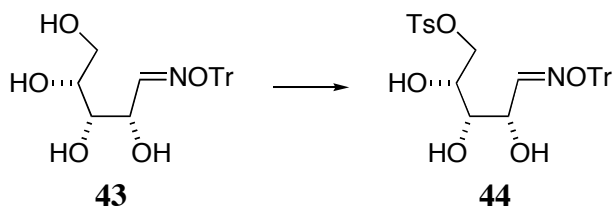

TsCl (460 mg, 2.41 mmol) was added to a stirred and cooled (0 °C) solution of **43** (890 mg, 2.19 mmol) in pyridine (5 mL), and stirring was continued overnight. Water (10 mL) was added to quench the reaction, and the mixture was extracted with Et<sub>2</sub>O (2 x 10 mL). The combined organic extracts were dried (MgSO<sub>4</sub>) and evaporated. Flash chromatography of the residue over silica gel (1.7 x 30 cm), using 50% EtOAc-hexane, gave **44** (658 mg, 54%) as a foam. The material was used directly, without characterization.

**D-Ribose 2,3,4-Triacetate 5-(4-Methylbenzenesulfonate) O-(Triphenylmethyl)oxime (45).**

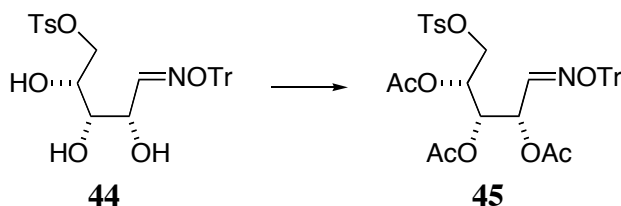

Pyridine (4.6 mL, 80 mmol) was added to a stirred and cooled (0 °C) solution of **44** (405 mg, 0.722 mmol) in Ac<sub>2</sub>O (10.6 mL, 144 mmol), and stirring was continued overnight. Water (15 mL) was added and the mixture was extracted with Et<sub>2</sub>O (3 x 10 mL). The combined organic extracts were washed with saturated aqueous NaHCO<sub>3</sub> and water (10 mL), dried (MgSO<sub>4</sub>), and evaporated. Flash chromatography of the residue over silica gel (1.7 x 30 cm), using 20% EtOAc-hexane, gave **45** (459 mg, 93%) as a foam. The material, which contained small impurities, appeared to be a single isomer, but was used with only partial characterization (<sup>1</sup>H NMR): <sup>1</sup>H NMR (CDCl<sub>3</sub>, 300 MHz) δ 1.86 (s, 3 H), 1.91 (s, 6 H), 2.4 (s, 3 H), 4.01-4.3 (m, 2 H), 4.94-5.09 (m, 1 H), 5.22-5.48 (m, 2 H), 7.18-7.42 (m, 17 H), 7.49 (d, *J* = 7 Hz, 1 H), 7.72 (d, *J* = 8 Hz, 2 H).

The oxime geometry was not determined.

**2,3,4-Tris-O-(phenylmethyl)-D-ribose O-(Triphenylmethyl)oxime (47).**

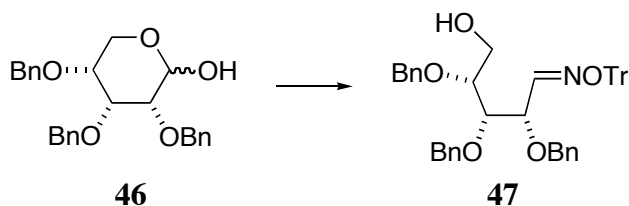

The general procedure for making *O*-trityl oximes was followed, using  $\text{TrONH}_2$  (80 mg, 0.29 mmol) and **46**<sup>33</sup> (110 mg, 0.26 mmol) in THF (5 mL). Flash chromatography of the residue over silica gel (1.7 x 25 cm), using 15% EtOAc-hexane, gave **47** (167 mg, 94%) as a foam, which was a 5:1 mixture of geometrical isomers ( $^1\text{H}$  NMR): FTIR ( $\text{CH}_2\text{Cl}_2$  cast) 3462, 3060, 2869, 1597  $\text{cm}^{-1}$ ;  $^1\text{H}$  NMR ( $\text{CDCl}_3$ , 500 MHz) (in some regions the multiplets include AB quartet signals)  $\delta$  3.24-3.31 (m, 1 H), 3.60-3.78 (m, 2.3 H), 3.85 (dd,  $J = 7.0, 2.8$  Hz, 0.93 H), 3.95 (dd,  $J = 7.0, 2.8$  Hz, 0.25 H), 4.01-4.22 (m, 3.6 H), 4.37-4.58 (m, 2 H), 4.62-4.89 (m, 2 H), 5.24 (dd,  $J = 6.0, 2.0$  Hz, 0.2 H), 6.84 (d,  $J = 7.0$  Hz, 0.2 H), 6.98-7.44 (m, 30 H), 7.66 (d,  $J = 7.0$  Hz, 0.98 H);  $^{13}\text{C}$  NMR ( $\text{CDCl}_3$ , 125.7 MHz)  $\delta$  61.0 (t), 70.5 (t), 72.4 (t), 74.5 (t), 77.1 (d), 78.5 (d), 80.4 (d), 90.8 (s), 127.0 (d), 127.46 (d), 127.49 (d), 127.53 (d), 127.55 (d), 127.57 (d), 127.6 (d), 127.7 (d), 127.81 (d), 127.84 (d), 128.1 (d), 128.21 (d), 128.23 (d), 128.3 (d), 128.31 (d), 128.34 (d), 129.0 (d), 129.1 (d), 137.6 (s), 137.7 (s), 138.0 (s), 144.2 (s), 148.9 (d); exact mass  $m/z$  calcd for  $\text{C}_{45}\text{H}_{43}\text{NO}_5$  678.3219, found 678.3217.

***Trans*-2-[2-Bromocyclohexyl]oxy]acetaldehyde (**49**).**

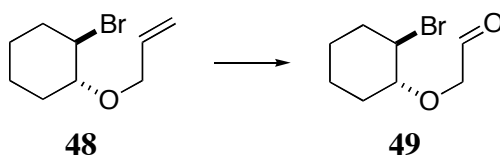

Ozone was bubbled through a stirred and cooled ( $-78\text{ }^\circ\text{C}$ ) solution of **48**<sup>34</sup> (697.4 mg, 3.184 mmol) in  $\text{CH}_2\text{Cl}_2$  (15 mL) for 1 h. The mixture was then flushed with  $\text{O}_2$  for 10 min, and  $\text{Ph}_3\text{P}$  (2.5 g, 9.6 mmol) was added. Stirring was continued overnight, the cold bath being left in place, but not recharged. Evaporation of the solvent and flash chromatography of the residue over silica gel (1.7 x 30 cm), using 15% EtOAc-hexane, gave **49** (609 mg, 87%) as a colorless oil: FTIR ( $\text{CH}_2\text{Cl}_2$  cast) 3450, 2937, 2860, 1735  $\text{cm}^{-1}$ ;  $^1\text{H}$  NMR ( $\text{CDCl}_3$ , 400 MHz)  $\delta$  1.19-2.42 (m, 8 H), 3.29-3.43 (m, 1 H), 3.82-4.11 (m, 1 H), 4.21 (s, 2 H), 9.79 (s, 1 H);  $^{13}\text{C}$  NMR ( $\text{CDCl}_3$ , 100.6 MHz)  $\delta$  22.9 (t), 25.1 (t), 30.9 (t), 35.5 (t), 54.8 (d), 75.3 (t), 83.3 (d), 200.8 (d); exact mass  $m/z$  calcd for  $\text{C}_8\text{H}_{13}^{79}\text{BrNaO}_2$  242.9996, found 242.9991.

**Diethyl (2-Bromoethyl)(2-oxoethyl)propanedioate (51).**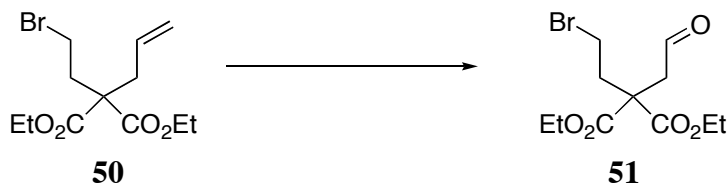

OsO<sub>4</sub> (0.1 M in PhMe, 0.19 mL, 0.019 mmol) was added in one portion to a stirred solution of **50**<sup>35</sup> (59.0 mg, 0.192 mmol) in a mixture of dioxane (3 mL) and water (1 mL). The mixture was stirred for 30 min and then NaIO<sub>4</sub> (102.7 mg, 0.48 mmol) was added in several small portions. The resulting solution was stirred for 2 h, then quenched with water and extracted with EtOAc. The combined organic extracts were washed with brine and dried (Na<sub>2</sub>SO<sub>4</sub>). Evaporation of the solvent and flash chromatography of the residue over silica gel (1.5 x 20 cm), using 30% EtOAc-hexane, gave aldehyde **51**<sup>36</sup> (56 mg, 94%) as an oil: <sup>1</sup>H NMR (CDCl<sub>3</sub>, 300 MHz) δ 1.22 (t, *J* = 7.1 Hz, 6 H), 2.52-2.62 (m, 2 H), 3.02 (apparent d, *J* = 1.3 Hz, 2 H), 3.32-3.42 (m, 2 H), 4.22 (q, *J* = 7.1 Hz, 4 H), 9.74 (t, *J* = 1.3 Hz, 1 H).

**(1-Bromomethyl)-4-penten-1-yl Acetate (53).**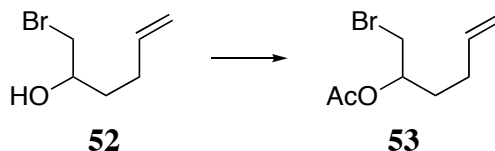

Pyridine (1 mL) was added to a stirred and cooled (0 °C) mixture of Ac<sub>2</sub>O (5 mL) and **52**<sup>37</sup> (310 mg, 1.73 mmol), and stirring was continued overnight. Water (15 mL) was added and the mixture was extracted with Et<sub>2</sub>O (3 x 10 mL). The combined organic extracts were washed with saturated aqueous NaHCO<sub>3</sub>, and water (1 x 10 mL), dried, and evaporated. Flash chromatography of the residue over silica gel (1.7 x 30 cm), using 5% EtOAc-hexane, gave **53** (365 mg, 96%) as a colorless oil: FTIR (CH<sub>2</sub>Cl<sub>2</sub> cast) 3465, 3078, 2977, 2924, 1742, 1641 cm<sup>-1</sup>; <sup>1</sup>H NMR (CDCl<sub>3</sub>, 500 MHz) δ 1.73-1.82 (m, 2 H), 2.02-2.14 (m, including a singlet at δ 2.07, 5 H in all), 3.38-3.57 (m, 2 H), 4.87-5.09 (m, 3 H), 5.70-5.82 (m, 1 H); <sup>13</sup>C NMR (CDCl<sub>3</sub>, 125.7 MHz) δ 21.1 (q), 29.4 (t), 31.8 (t), 34.1 (t), 71.8 (d), 115.5 (t), 136.9 (d), 170.2 (s). A satisfactory mass spectrum could not be obtained by electron impact or electrospray methods.

**(1-Bromomethyl)-4-oxobutyl Acetate (54).**

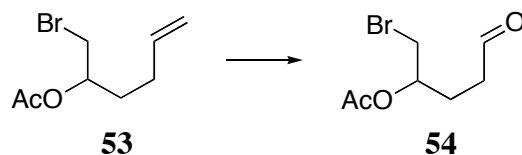

OsO<sub>4</sub> (2.5% w/w in *t*-BuOH, 2.0 mL, 0.16 mmol) was added to a stirred mixture of **53** (358 mg, 1.62 mmol), water (8 mL), CCl<sub>4</sub> (8 mL) and *t*-BuOH (4 mL). After 20 min, the mixture had become black. NaIO<sub>4</sub> (870 mg, 4.05 mmol) was then added in one portion and the resulting mixture was stirred for 6 h. Brine (10 mL) was added, and the mixture was extracted with Et<sub>2</sub>O (3 x 10 mL). The combined organic extracts were washed with water (10 mL) and aqueous NaHSO<sub>3</sub> (10%, 15 mL), dried (MgSO<sub>4</sub>), and evaporated. Flash chromatography of the residue over silica gel (1.7 x 28 cm), using 20% EtOAc-hexane, gave **54** (289 mg, 80%) as a colorless oil. The material appeared to be a mixture of the aldehyde and its hydrate (<sup>1</sup>H and <sup>13</sup>C NMR): FTIR (CH<sub>2</sub>Cl<sub>2</sub> cast) 3459, 2966, 2936, 1739 cm<sup>-1</sup>; <sup>1</sup>H NMR (CDCl<sub>3</sub>, 500 MHz) δ 1.44-2.56 (m, including a singlet at δ 2.07, 7 H in all), 3.37-3.49 (m, 2 H), 4.82-5.11 (m, 1.6 H), 9.76 (t, *J* = 1.3 Hz, 0.3 H); <sup>13</sup>C NMR (CDCl<sub>3</sub>, 100.6 MHz) δ 20.8 (q), 20.9 (q), 25.0 (t), 26.4 (t), 29.7 (t), 33.4 (t), 33.8 (t), 39.5 (t), 71.5 (d), 71.8 (d), 100.5 (d), 170.2 (s), 170.3 (s), 200.4 (d); exact mass (electrospray) *m/z* calcd for C<sub>7</sub>H<sub>12</sub><sup>79</sup>BrO (M + H) 222.9969, found 222.9967.

### 2-(But-3-enyl)cyclopentanol (**56**).

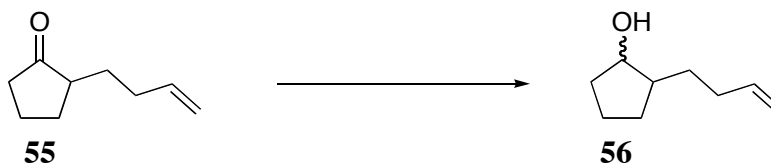

NaBH<sub>4</sub> (340 mg, 8.99 mmol) was added to a stirred and cooled (0 °C) **55**<sup>38</sup> (618 mg, 4.478 mmol) and dry MeOH (40 mL). Stirring was continued for 5 h, and the mixture was quenched with saturated aqueous NH<sub>4</sub>Cl and extracted with EtOAc. The combined organic extracts were washed with brine, dried (Na<sub>2</sub>SO<sub>4</sub>) and evaporated. Flash chromatography of the residue over silica gel (2 x 30 cm), using 30% EtOAc-hexane, gave **56**<sup>39</sup> (590 mg, 94%) as an oil, which was a mixture of *cis* and *trans* isomers, with one of these greatly predominating (<sup>1</sup>H NMR): FTIR (CH<sub>2</sub>Cl<sub>2</sub>, cast) 3339, 2954, 2925, 2872, 1640 cm<sup>-1</sup>; <sup>1</sup>H NMR (CDCl<sub>3</sub>, 400 MHz) δ 1.03-1.32 (m, 2 H), 1.44-1.75 (m, 6 H), 1.78-2.20 (m, 4 H), 3.80 (q, *J* = 5.5 Hz, 1 H), 4.87-5.05 (m, 2 H), 5.80 (dddd, *J* = 16.9, 10.2, 6.7, 6.7 Hz, 1 H); <sup>13</sup>C NMR (CDCl<sub>3</sub>, 100.6 MHz) (major isomer only) δ 21.7 (t), 29.8 (t), 32.3 (t), 32.9 (t), 34.6 (t), 47.7 (d), 79.0 (d), 114.2 (t), 138.8 (d);

exact mass  $m/z$  calcd for  $C_9H_{16}O$  140.12012, found 140.11971.

**1-(But-3-enyl)-2-iodocyclopentane (**57**).**

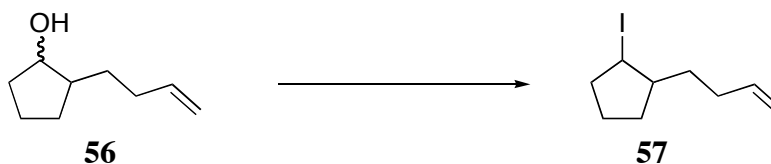

Imidazole (698 mg, 10.25 mmol) was added to a stirred solution of **56** (377.8 mg, 2.699 mmol) in THF (30 ml). The mixture was cooled to 0 °C and stirred for 10 min.  $Ph_3P$  (1.91 g, 7.282 mmol) was added in one portion and stirring was continued for additional 10 min.  $I_2$  (1.78 g, 7.013 mmol) was then added in one portion and stirring at 0 °C was continued for 2 h. The ice bath was left in place, but not recharged, and stirring was continued overnight. The mixture was quenched with saturated aqueous  $Na_2S_2O_3$  and extracted with  $Et_2O$ . The combined organic extracts were washed with water and brine, dried ( $Na_2SO_4$ ) and evaporated. Flash chromatography of the residue over silica gel (2 x 20 cm), using hexane, gave **57** (383.6 mg, 57%) as an oil, which appeared to be a single isomer (NMR): FTIR ( $CH_2Cl_2$ , cast) 2959, 2924, 2867, 910  $cm^{-1}$ ;  $^1H$  NMR ( $CDCl_3$ , 300 MHz)  $\delta$  0.84-0.99 (m, 1 H), 1.09-2.43 (m, 10 H), 3.79 (q,  $J = 8.2$  Hz, 0.1 H), 4.55 (ddd,  $J = 4.1, 4.1, 4.1$  Hz, 0.9 H), 4.92-5.10 (m, 2 H), 5.83 (dddd,  $J = 16.7, 10.2, 6.7, 6.7$  Hz, 1 H);  $^{13}C$  NMR ( $CDCl_3$ , 100.6 MHz)  $\delta$  21.7 (t), 28.9 (t), 32.2 (t), 35.9 (t), 38.9 (t), 45.2 (d), 46.2 (d), 114.7 (t), 138.5 (d); exact mass  $m/z$  calcd for  $C_9H_{15}$  (M - I) 123.11738, found 122.11701.

**3-(2-Iodocyclopentyl)propanal (**58**).**

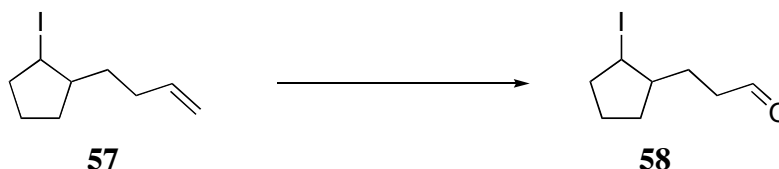

$OsO_4$  in  $PhMe$  (0.1 M, 0.40 mL, 0.04 mmol) was added in one portion to a stirred solution of **57** (100 mg, 0.40 mmol) in water (1 mL) and dioxane (3 mL). Stirring was continued for 20 min and then  $NaIO_4$  (220 mg, 1.029 mmol) was added in small portions over 10 min. The mixture was stirred for an additional 2 h, diluted with  $EtOAc$  and washed with water and brine, dried ( $MgSO_4$ ) and evaporated. Flash chromatography of the residue over silica gel (1.5 x 30

cm), using 10% EtOAc-hexane, gave **58** (57.2 mg, 57%) as an oil, which was largely a single isomer ( $^1\text{H}$  NMR): FTIR ( $\text{CH}_2\text{Cl}_2$ , cast) 2952, 2865, 1723, 668  $\text{cm}^{-1}$ ;  $^1\text{H}$  NMR ( $\text{CDCl}_3$ , 400 MHz)  $\delta$  0.84-2.60 (m, 11 H), 3.70 (q,  $J = 8.3$  Hz, 0.11 H), 4.51 (ddd,  $J = 4.3, 4.3, 4.3$  Hz, 0.89 H), 9.78 (t,  $J = 1.7$  Hz, 1 H);  $^{13}\text{C}$  NMR ( $\text{CDCl}_3$ , 100.6 MHz)  $\delta$  21.7 (t), 28.9 (t), 29.1 (t), 38.7 (t), 42.1 (t), 43.7 (d), 45.9 (d), 201.9 (d); exact mass  $m/z$  calcd for  $\text{C}_8\text{H}_{13}\text{O}$  (M - I) 125.09664, found 125.09652.

**[1-(But-3-enyl)cyclohexyl]methanol (**60**).**

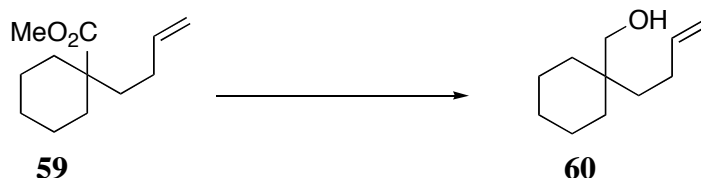

DIBAL (1 M, 15.6 mL, 15.6 mmol) was added dropwise to a stirred and cooled ( $-78\text{ }^{\circ}\text{C}$ ) solution of ester **59**<sup>40</sup> (1.17 g, 5.97 mmol) in dry  $\text{CH}_2\text{Cl}_2$  (40 mL). The mixture was stirred at  $-78\text{ }^{\circ}\text{C}$  for 4 h. The mixture was quenched with solid sodium potassium tartrate (ca 3 g) and glycerol (ca 6 mL) and the cold bath was removed and stirring was continued overnight, by which stage two layers had formed. The mixture was extracted with EtOAc (3 times) and the combined organic extracts were washed with brine, dried ( $\text{Na}_2\text{SO}_4$ ) and evaporated. Flash chromatography of the residue over silica gel (3 x 20 cm), using 10% EtOAc-hexane, gave **60** (780 mg, 78%) as a colorless oil: FTIR ( $\text{CH}_2\text{Cl}_2$  cast) 3345, 2926, 2853, 1454  $\text{cm}^{-1}$ ;  $^1\text{H}$  NMR ( $\text{CDCl}_3$ , 300 MHz)  $\delta$  1.23-1.51 (m, 12 H), 1.92-2.05 (m, 2 H), 3.43 (d,  $J = 4.5$  Hz, 2 H), 4.87-5.09 (m, 2 H), 5.84 (dddd,  $J = 16.8, 10.1, 6.6, 6.6$  Hz, 1 H);  $^{13}\text{C}$  NMR ( $\text{CDCl}_3$ , 100.6 MHz)  $\delta$  21.4 (t), 26.3 (t), 27.4 (t), 32.3 (t), 33.9 (t), 36.9 (s), 68.2 (t), 113.9 (t), 139.6 (d); exact mass  $m/z$  calcd for  $\text{C}_{11}\text{H}_{18}$  (M- $\text{H}_2\text{O}$ ) 150.14085, found 150.14043.

**1-(But-3-enyl)-1-(iodomethyl)cyclohexane (**61**).**

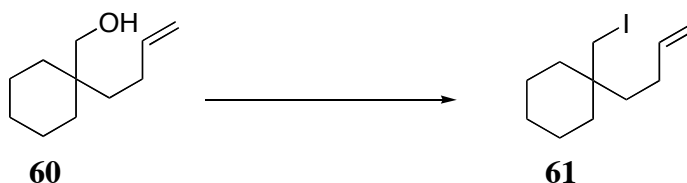

Imidazole (110 mg, 1.67 mmol) was added to a stirred solution of **60** (74 mg, 0.44 mmol) in THF (5 mL) and the mixture was cooled to  $0\text{ }^{\circ}\text{C}$ . Stirring was continued until all the

imidazole had dissolved and then  $\text{Ph}_3\text{P}$  (312 mg, 1.19 mmol) was added. Stirring was continued for an additional 10 min,  $\text{I}_2$  (290 mg, 1.14 mmol) was added in one portion and stirring was continued for 2 h. The cold bath was left in place, but not recharged, and stirring was continued overnight. The mixture was quenched with saturated aqueous  $\text{Na}_2\text{S}_2\text{O}_3$  and extracted with  $\text{Et}_2\text{O}$  (3 times). The combined organic extracts were washed with brine, dried ( $\text{Na}_2\text{SO}_4$ ) and evaporated. Flash chromatography of the residue over silica gel (2 x 25 cm), using 10%  $\text{EtOAc}$ -hexane, gave **61** (120 mg, 100%): FTIR (neat film microscope) 2926, 2851, 1641, 910  $\text{cm}^{-1}$ ;  $^1\text{H}$  NMR ( $\text{CDCl}_3$ , 400 MHz)  $\delta$  1.26-1.55 (m, 12 H), 1.86-2.03 (m, 2 H), 3.25 (s, 2 H), 4.91-5.13 (m, 2 H), 5.85 (dddd,  $J = 16.8, 10.2, 6.6, 6.6$  Hz, 1 H);  $^{13}\text{C}$  NMR ( $\text{CDCl}_3$ , 100.6 MHz)  $\delta$  21.7 (t), 21.8 (t), 26.0 (t), 27.0 (t), 34.9 (t), 34.9 (t), 37.1 (s), 114.2 (t), 138.8 (d); exact mass  $m/z$  calcd for  $\text{C}_{11}\text{H}_{19}\text{I}$  278.05316, found 278.05280.

**3-[(1-Iodomethyl)cyclohexyl]propanal (62).**

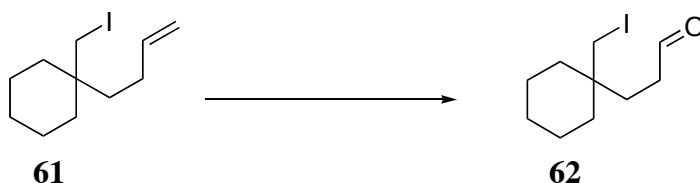

$\text{OsO}_4$  (0.1 M in  $\text{PhMe}$ , 3.2 mL, 0.32 mmol) was added in one portion to a stirred solution of alkene **61** (896 mg, 3.22 mmol) in water (8 mL) and dioxane (24 mL). The mixture was stirred for 20 min and then  $\text{NaIO}_4$  (1.72 g, 8.0 mmol) was added in small portions and stirring was continued for 2 h. The mixture was diluted with water and extracted with  $\text{EtOAc}$  (3 times). The combined organic extracts were washed with brine, dried ( $\text{Na}_2\text{SO}_4$ ) and evaporated. Flash chromatography of the residue over silica gel (2 x 20 cm), using 10%  $\text{EtOAc}$ -hexane, gave **62** (636 mg, 71%): FTIR (neat film microscope) 2927, 2854, 1725  $\text{cm}^{-1}$ ;  $^1\text{H}$  NMR ( $\text{CDCl}_3$ , 400 MHz)  $\delta$  1.32-1.54 (br s, 10 H), 1.64-1.75 (m, 2 H), 2.26-2.40 (m, 2 H), 3.20 (s, 2 H), 9.80 (t,  $J = 1.8$  Hz, 1 H);  $^{13}\text{C}$  NMR ( $\text{CDCl}_3$ , 100.6 MHz)  $\delta$  20.4 (t), 21.7 (t), 25.9 (t), 30.1 (s), 34.6 (t), 34.8 (t), 37.8 (t), 202.0 (d); exact mass  $m/z$  calcd for  $\text{C}_{10}\text{H}_{17}\text{IO}$  280.03241, found 280.03232.

***Trans*-2-[(2-Bromocyclohexyl)oxy]acetaldehyde *O*-(Phenylmethyl)oxime.**

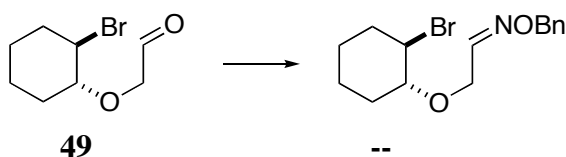

*O*-Benzylhydroxylamine hydrochloride (330 mg, 2.66 mmol) was added to a stirred solution of **49** (490 mg, 2.22 mmol) in THF (10 mL). Pyridine (350 mg, 4.44 mmol) was then added, and the mixture was refluxed for 10 h, cooled, filtered and evaporated. Flash chromatography of the residue over silica gel (1.7 x 32 cm), using 8% EtOAc-hexane, gave *trans*-2-[(2-bromocyclohexyl)oxy]acetaldehyde *O*-(phenylmethyl)oxime (632 mg, 88%) as a light yellow oil, which was a mixture of *Z* and *E* isomers ( $^1\text{H}$  NMR): FTIR ( $\text{CH}_2\text{Cl}_2$  cast) 3087, 3063, 2937, 2860, 1452  $\text{cm}^{-1}$ ;  $^1\text{H}$  NMR ( $\text{CDCl}_3$ , 400 MHz)  $\delta$  1.19-2.4 (m, 8 H), 3.27-3.39 (m, 1 H), 3.88-3.99 (m, 1 H), 4.12-4.51 (m, 2 H), 5.09 (d,  $J$  = 1.6 Hz, 2 H), 6.87 (t,  $J$  = 4.0 Hz, 0.42 H), 7.23-7.59 (m, 5 H), 7.53 (t,  $J$  = 4.0 Hz, 0.5 H);  $^{13}\text{C}$  NMR ( $\text{CDCl}_3$ , 100.6 MHz)  $\delta$  23.2 (t), 25.4 (t), 30.7 (t), 30.9 (t), 35.6 (t), 54.9 (d), 55.2 (d), 64.0 (t), 66.4 (t), 75.9 (t), 76.3 (t), 81.5 (s), 82.4 (s), 127.8 (d), 127.9 (d), 128.0 (d), 128.1 (d), 128.4 (d), 137.4 (s), 137.5 (s), 147.9 (d), 151.1 (d); exact mass (electrospray)  $m/z$  calcd for  $\text{C}_{15}\text{H}_{20}^{79}\text{BrNNaO}_2$  348.0575, found 348.0570.

The oxime geometry was not established.

***O*-Benzyl-*N*-[(3 $\alpha$ ,7 $\alpha$ )octahydrobenzofuran-3-yl]hydroxylamine.**

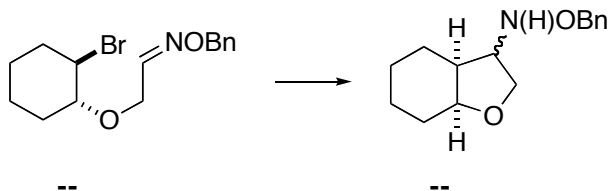

General procedure A for radical cyclization was followed, using *trans*-2-[(2-bromocyclohexyl)oxy]acetaldehyde *O*-(phenyl-methyl)oxime (281 mg, 0.865 mmol) in THF (50 mL),  $\text{Bu}_3\text{SnH}$  (370 mg, 1.30 mmol) in THF (5 mL), and ABC (4 mg, 0.02 mmol) in THF (5 mL). Flash chromatography of the residue over silica gel (1.7 x 20 cm), using 20% EtOAc-hexane, gave *O*-benzyl-*N*-[(3 $\alpha$ ,7 $\alpha$ )octahydrobenzofuran-3-yl]hydroxylamine (129 mg, 61%) as a foam, which was a mixture of two isomers ( $^1\text{H}$  NMR): FTIR ( $\text{CH}_2\text{Cl}_2$  cast) 3242, 3086, 3062, 2931  $\text{cm}^{-1}$ ;  $^1\text{H}$  NMR ( $\text{CDCl}_3$ , 400 MHz)  $\delta$  1.12-2.23 (m, 9 H), 3.41-3.46 (m, 0.68 H), 3.48-3.57 (m, 1 H), 3.91-4.20 (m, 1.8 H), 4.12 (dd,  $J$  = 10.3, 6.4 Hz, 0.7 H), 4.69, 4.70 (two s, 2 H in all), 4.83-5.92 (br s, 1 H), 7.22-7.43 (m, 5 H);  $^{13}\text{C}$  NMR ( $\text{CDCl}_3$ , 100.6 MHz)  $\delta$  20.4 (t), 20.5 (t), 20.9 (t), 24.1 (t), 24.2 (t), 26.1 (t), 27.7 (t), 28.2 (t), 39.7 (d), 41.4 (d), 64.0 (d), 67.1 (d), 68.3 (t), 69.8 (t), 75.6 (d), 76.0 (t), 76.6 (t), 77.3 (d), 127.8 (d), 127.9 (d), 128.3 (d), 128.4 (d), 128.5 (d), 137.7 (s); exact mass  $m/z$  calcd for  $\text{C}_{15}\text{H}_{22}\text{NO}_2$  ( $M + \text{H}$ ) 248.1650, found 248.1654.



## References and footnotes

- (25) Hwu, J. R.; Tseng, W. N.; Patel, H. V.; Wong, F. F.; Horng, D.-N.; Liaw, B. R.; Lin, L. *C. J. Org. Chem.* **1999**, *64*, 2211-2218.
- (26) Hardy, J.-C.; Venet, M. *Tetrahedron Lett.* **1982**, *23*, 1255-1256.
- (27) Pratap, R.; Gupta, R. C.; Anand, N. *Indian J. Chem. Sect. B* **1981**, *20*, 1063-1067.
- (28) Talybov, G. M.; Mekhtieva, V. Z.; Karaev, S. F. *Russian J. Org. Chem.* **2001**, *37*, 600.
- (29) We used NIS instead of I<sub>2</sub>/HgO.
- (30) Dutta, A. K.; Fei, X.-S.; Beardsley, P. M.; Newman, J. L.; Reith, M. E. A. *J. Med. Chem.* **2001**, *44*, 937-948.
- (31) Bonini, C.; Giuliano, C.; Righi, G.; Rossi, L. *Synth. Commun.* **1992**, *22*, 1863-1870.
- (32) Kaskar, B.; Heise, G. L.; Michalak, R. S.; Vishnuvajjala, B. R. *Synthesis*, **1990**, 1031-1032.
- (33) Tejima, S.; Ness, R. K.; Kaufman, R. L.; Fletcher, Jr., H. G. *Carbohydr. Res.* **1968**, *7*, 485-490.
- (34) Beckwith, A. L. J.; Page, D. M. *Tetrahedron* **1999**, *55*, 3245-3254.
- (35) Bunce, R. A.; Burns, S. E. *Org. Prep. Proc. Intl.* **1999**, *31*, 99-123.
- (36) Kim, S.; Kee, I. S.; Lee, S. *J. Am. Chem. Soc.* **1991**, *113*, 9882-9883.
- (37) Dolbier, Jr., W. R.; Rong, X. X.; Bartberger, M. D.; Koroniak, H.; Smart, B. E.; Yang, Z.-Y. *J. Chem. Soc., Perkin Trans. 2* **1998**, 219-231.
- (38) Molander, G. A.; McKie, J. A. *J. Org. Chem.* **1992**, *57*, 3132-3139.
- (39) The *trans* isomer corresponding to **56** is known: Hegedus, L. S.; McKearin, J. M. *J. Am. Chem. Soc.* **1982**, *104*, 2444-2451.
- (40) Nuhrich, A.; Moulines, J. *Tetrahedron* **1991**, *47*, 3075-3088. Our material had: FTIR 2936, 2854, 1731, 1455 cm<sup>-1</sup>; <sup>1</sup>H NMR (CDCl<sub>3</sub>, 400 MHz) δ 1.14-1.40 (m, 5 H), 1.50-1.65 (m, 5 H), 1.89-2.00 (m, 2 H), 2.03-2.15 (m, 2 H), 3.68 (s, 3 H), 4.88-5.03 (m, 2 H), 5.76 (dddd, *J* = 16.8, 10.2, 6.6, 6.6 Hz, 1 H); <sup>13</sup>C NMR (CDCl<sub>3</sub>, 100.6 MHz) δ 23.2 (t), 25.9 (t), 28.4 (t), 34.1 (t), 39.6 (t), 46.8 (s), 51.4 (q), 114.4 (t), 138.4 (d), 177.0 (s); exact mass *m/z* calcd for C<sub>12</sub>H<sub>20</sub>O<sub>2</sub> 196.14633, found 196.14612.

RSF-70

Pulse Sequence: s2pu1

500 MHz 1D in CDCl<sub>3</sub> (ref. to CDC13 @ 7.24 ppm), temp 27.2 C -> actual temp = 27.0 C, sw probe  
date: Aug 1 2001 seqfil: s2pu1 spectrometer: jbd5 file: exp  
acq.time [s]: 2.0 relax: time [s]: 3.0 sweep width [Hz]: 5006 dig.res. [Hz/pt]: 0.15

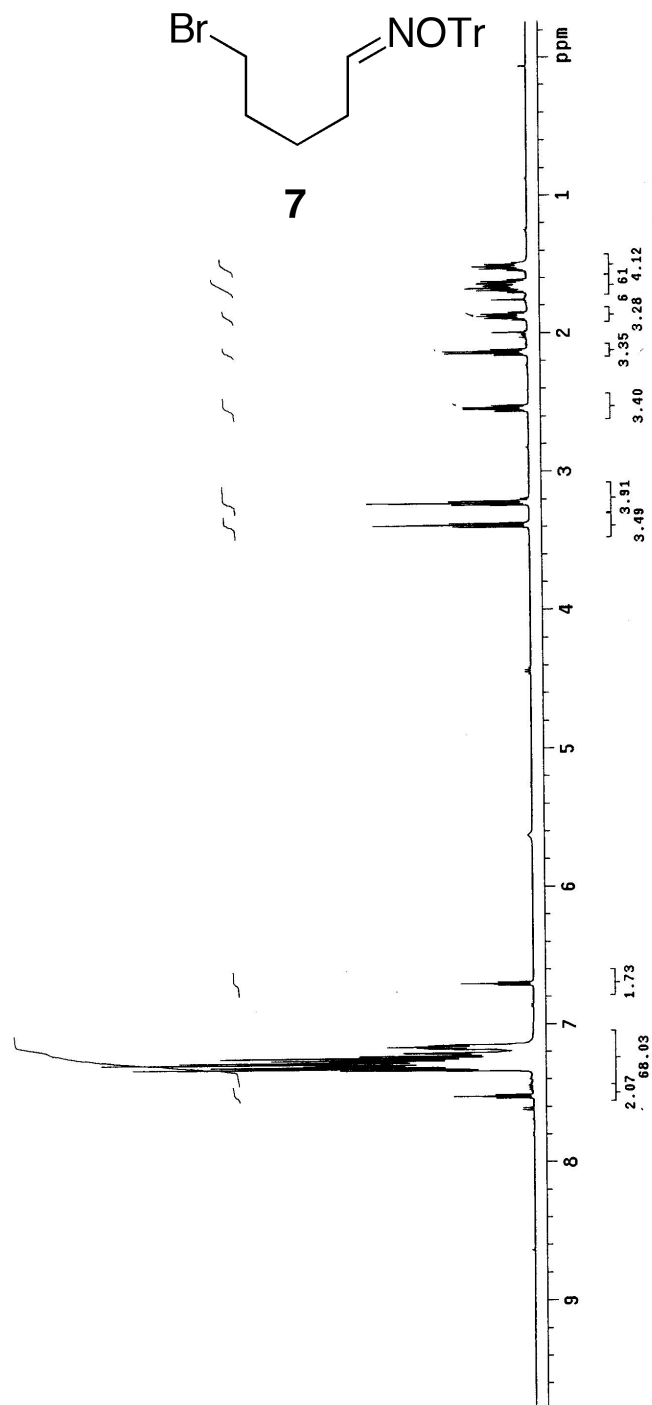

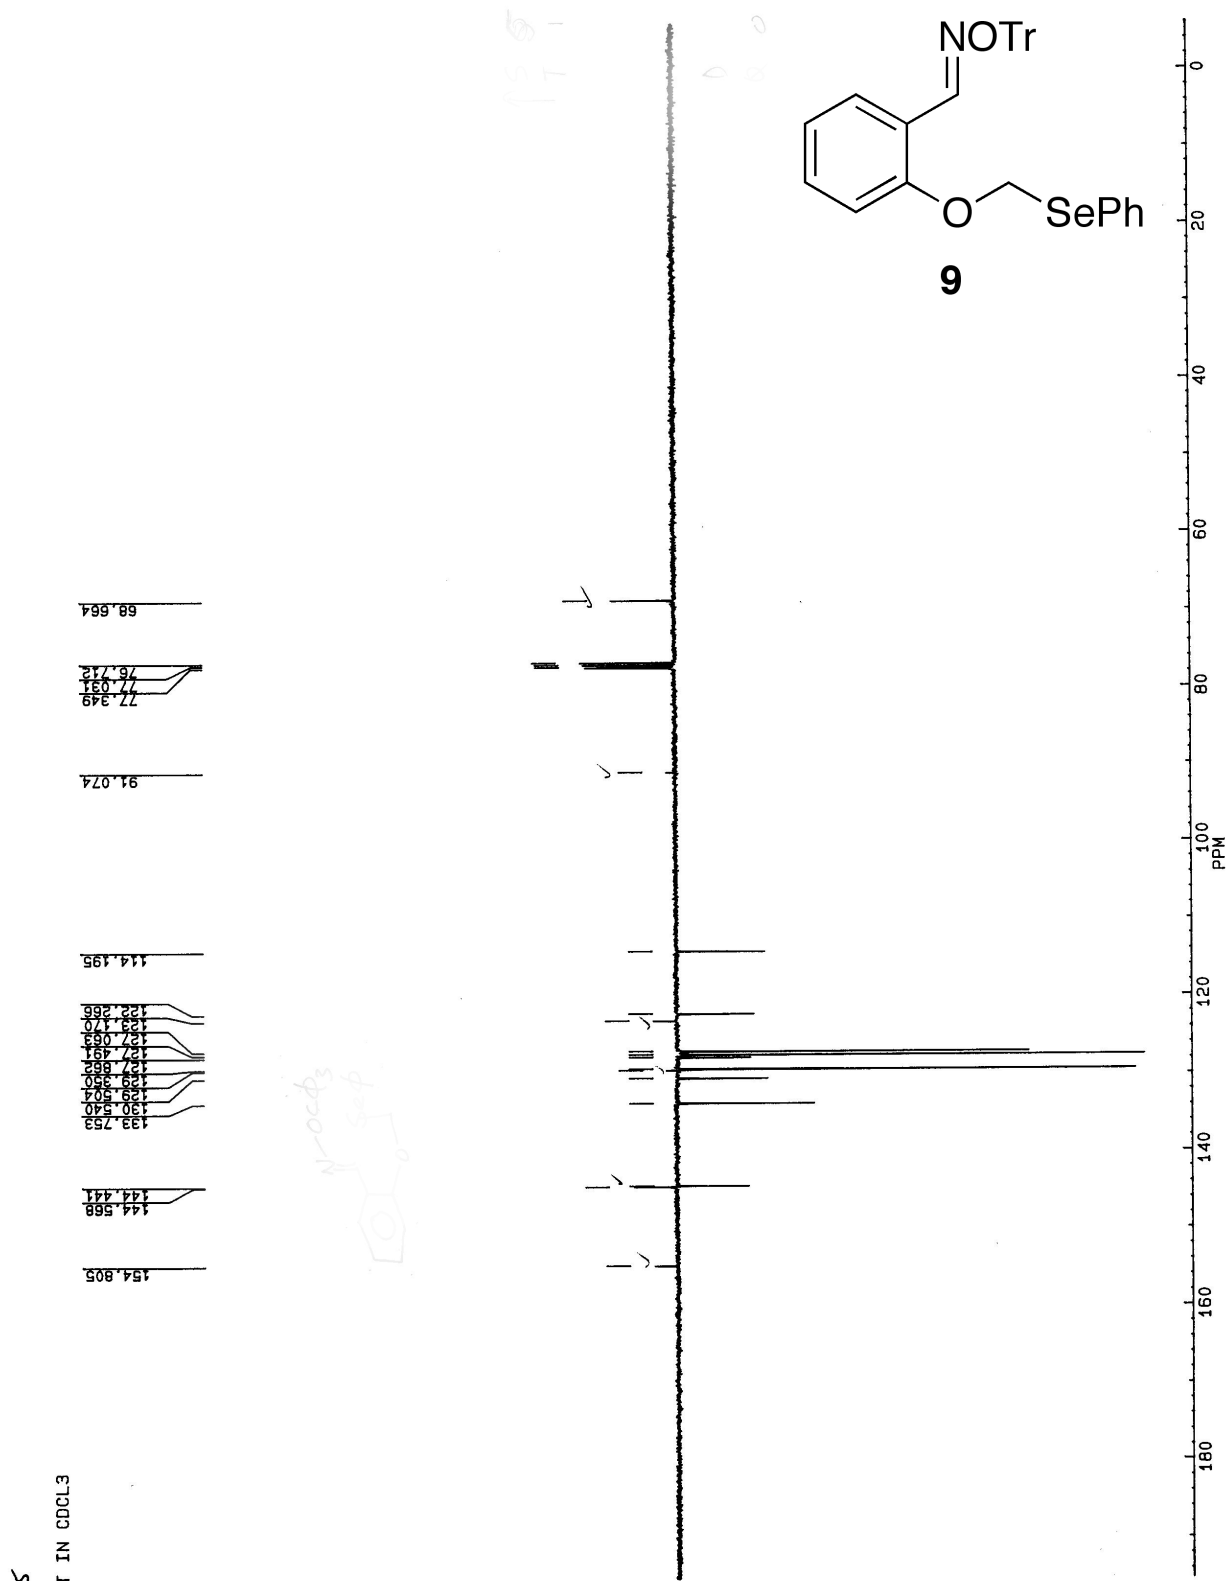

RSF-54

1H NMR (400 MHz, CDCl<sub>3</sub>) (ref. to CDCl<sub>3</sub> at 77.0 ppm), temp 27.2 C -> actual temp = 27.0 C, sv probe  
 13C NMR (100 MHz, CDCl<sub>3</sub>) (ref. to CDCl<sub>3</sub> at 77.0 ppm), temp 27.2 C -> actual temp = 27.0 C, sv probe  
 :time [s]: 2.00, :relax. time [s]: 0.50, :sweep width [Hz]: 25000, :freq [MHz]: 400.13, :acq. time [s]: 0.30, :f1 [MHz]: 100.62, :f2 [MHz]: 400.13, :file: /export/home4/nmr/lab/nmrdata/Subedi/RS-FS4-C13.f1d

Pulse Sequence: ap

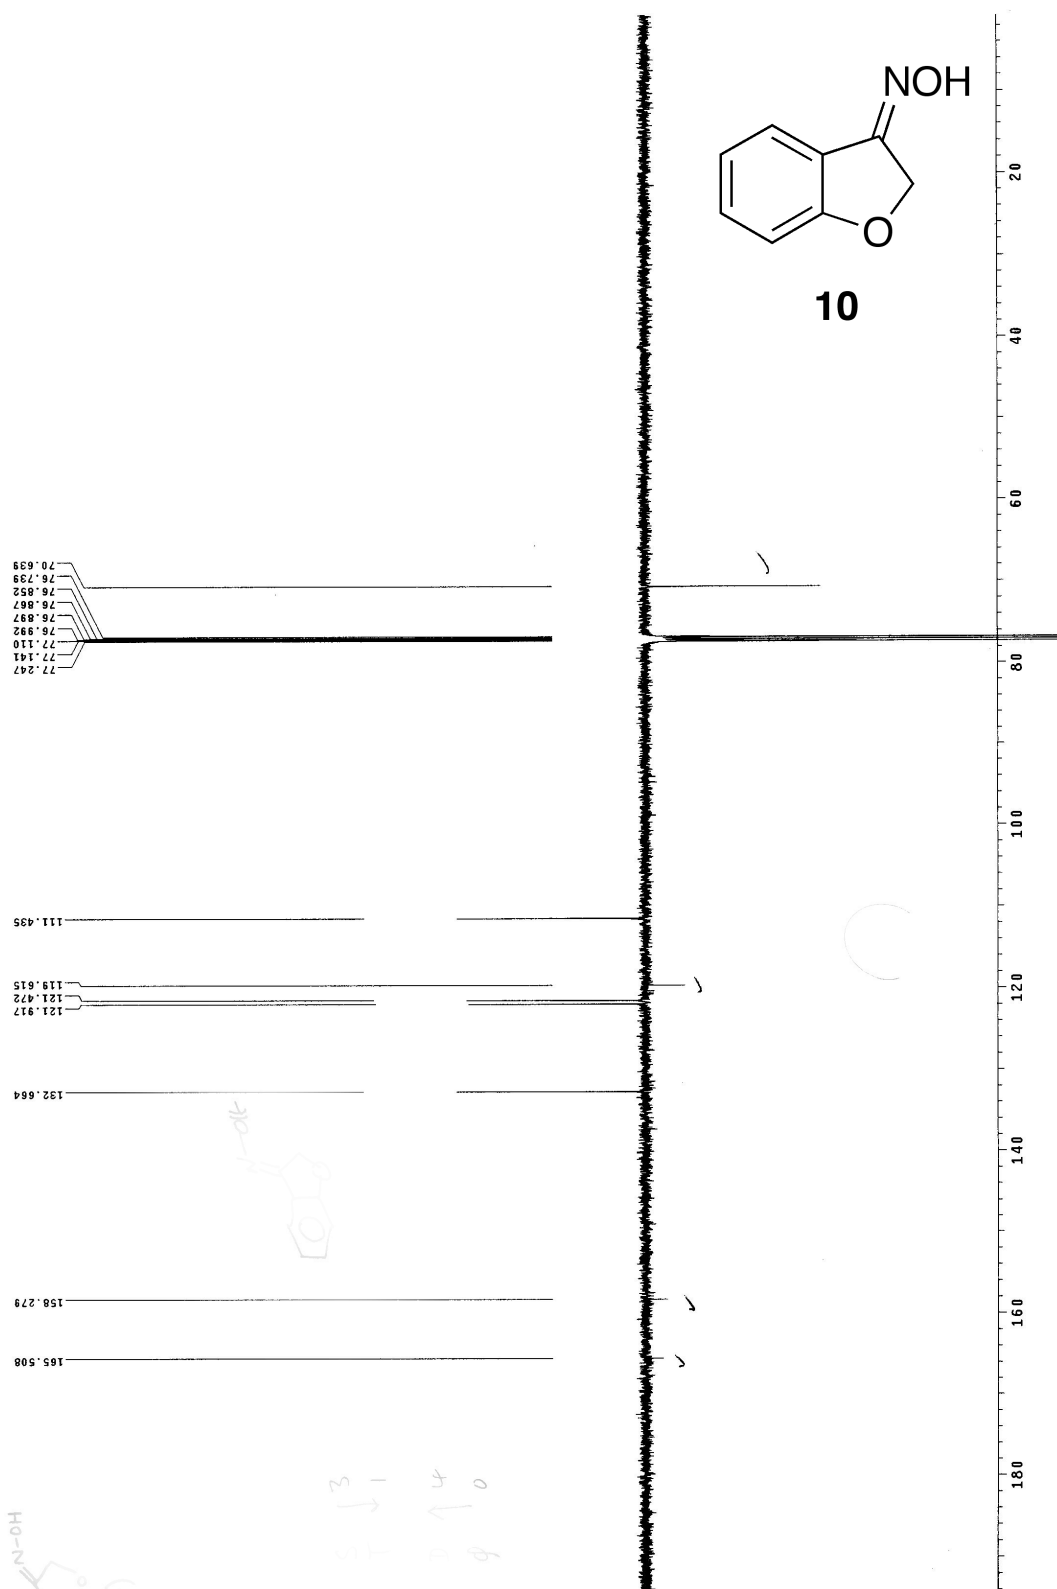

25F-57

25F-57  
 125 MHz in CDCl<sub>3</sub> (ref. to CDCl<sub>3</sub> at 77.0 ppm), temp 27.2 °C → actual temp = 27.0 °C, sw probe  
 25F-57  
 125 MHz in CDCl<sub>3</sub> (ref. to CDCl<sub>3</sub> at 77.0 ppm), temp 27.2 °C → actual temp = 27.0 °C, sw probe  
 25F-57  
 125 MHz in CDCl<sub>3</sub> (ref. to CDCl<sub>3</sub> at 77.0 ppm), temp 27.2 °C → actual temp = 27.0 °C, sw probe

Pulse Sequence: aq

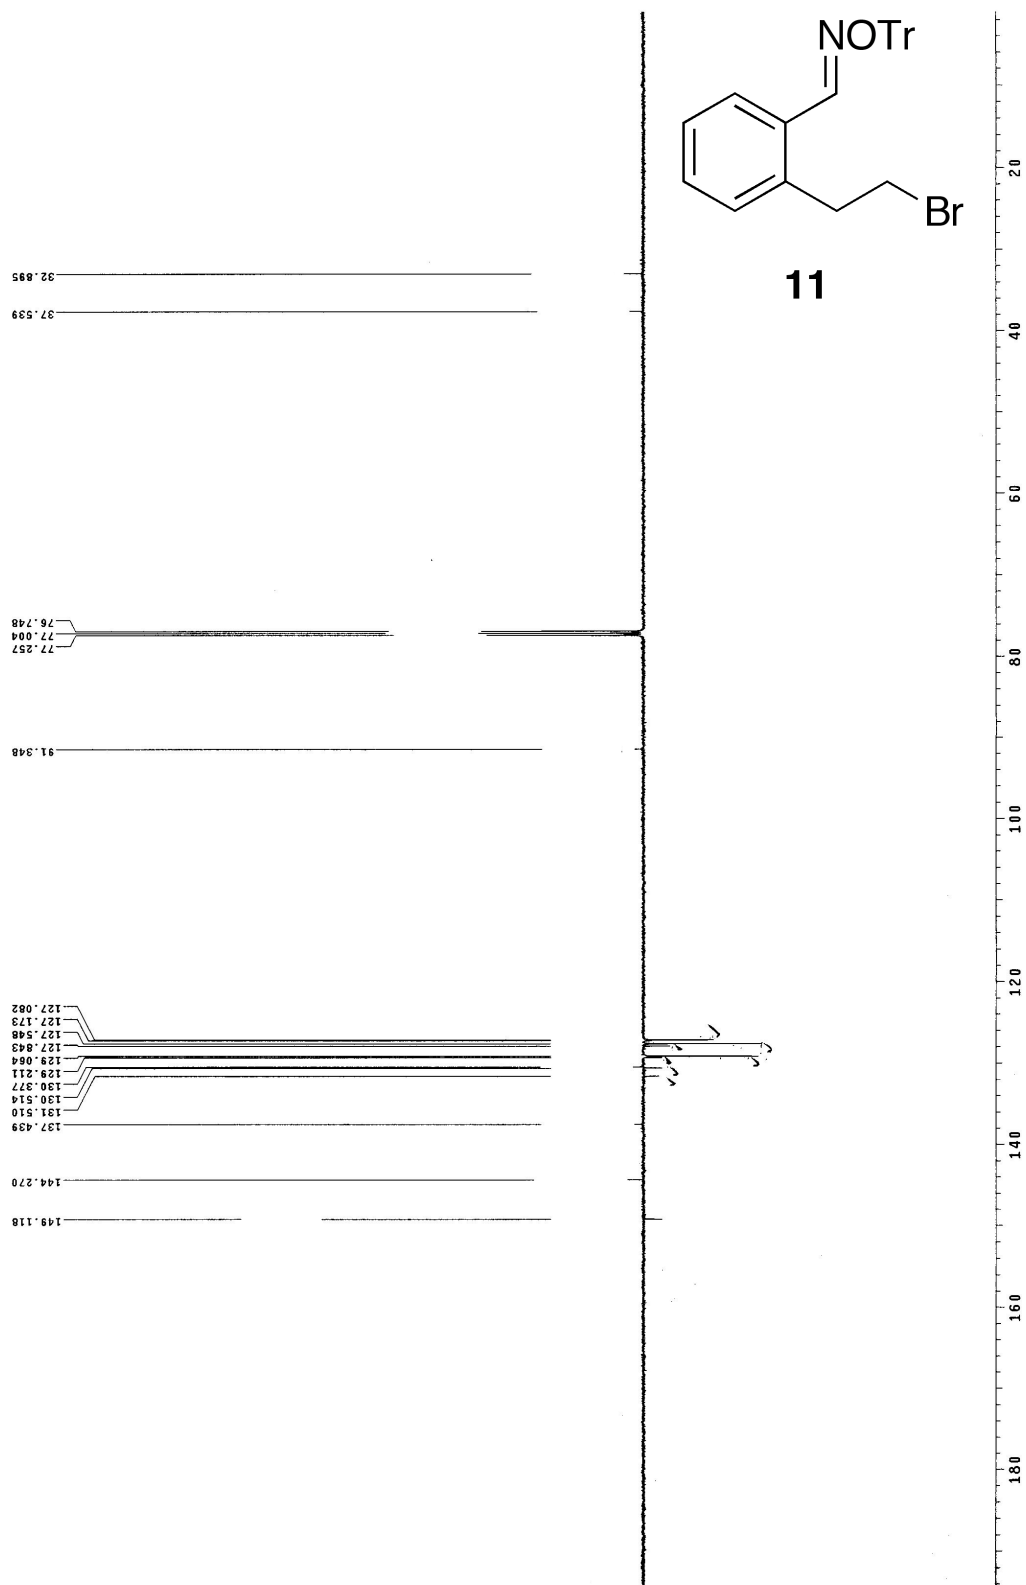

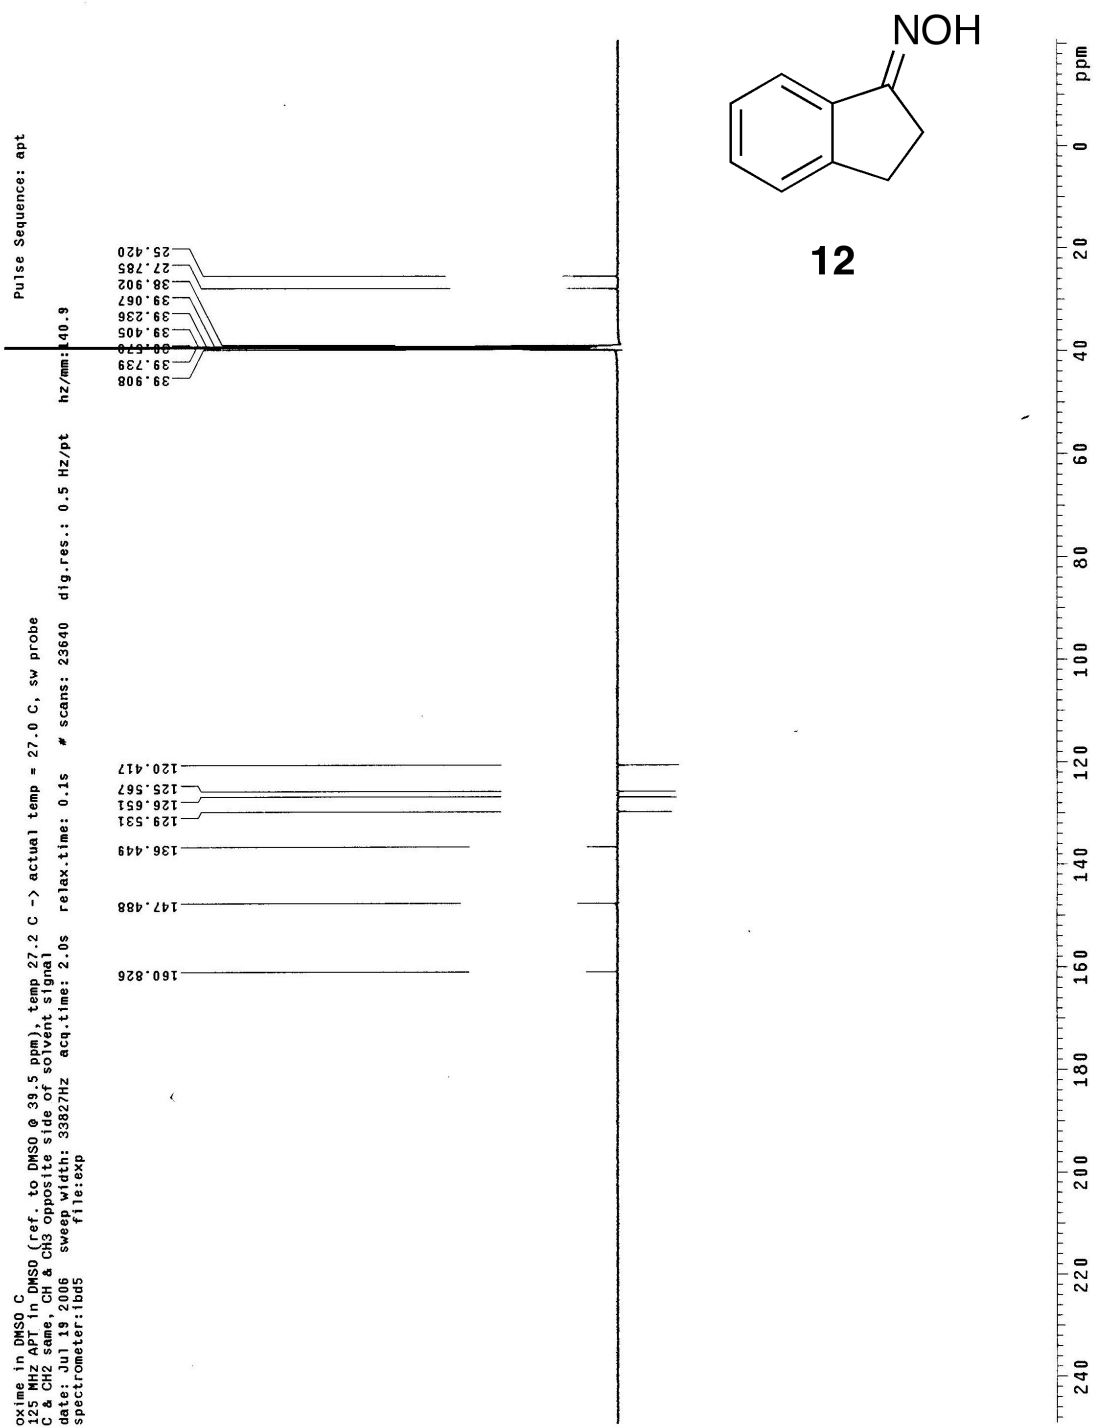

KS F-44

<sup>1</sup>H IN CDCl<sub>3</sub>~~BIOSER~~

JA26208C.001  
 DATE 28-1-1  
 SF 200.132  
 SY 239.0  
 O1 3300.000  
 SI 16384  
 TD 16384  
 SW 2994.012  
 HZ/PT .365  
 PW 3.0  
 RD .000  
 AG 2.736  
 RG 1024  
 NS 32  
 TE 297  
 FM 3800  
 O2 2871.838  
 DP 7L P0  
 LB 0.0  
 GB 0.0  
 CX 36.00  
 CY 0.0  
 F1 10.001P  
 F2 -799P  
 HZ/CN 60.040  
 CPW/CN .500  
 SR 2341.55

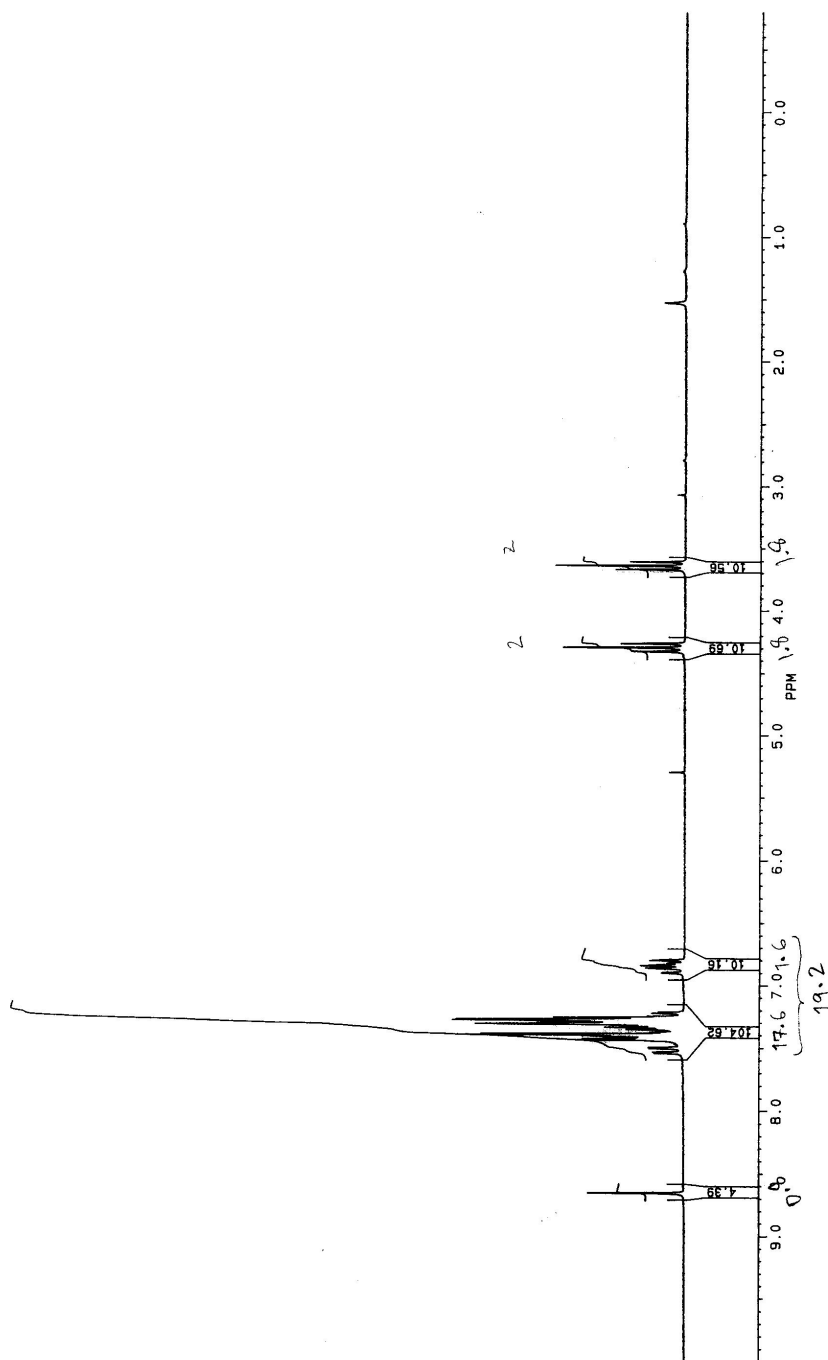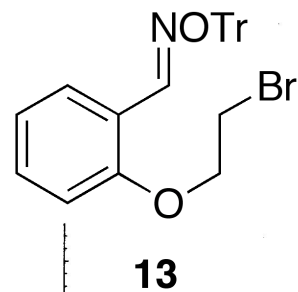





```

25 MHz APT in CDCl3 (ref. to CDC13 @ 77.0 ppm), temp 27.2 C -> actual temp = 27.0 C, sw probe
CH3 positive CH2 negative
Name: 3ulpos8i5eqf.acq file: /mnt/d/bdw
Date: Jul 26 2019 hz/mm: 71.43 spectrometer: lbdw
INSTRUM: spect file: /mnt/d/bdw
AcqTime [s]: 2.0 relax.time [s]: 0.5 sweep width [Hz]: 25000 dig.res. [Hz/pt]: 0.38

```

### Pulse Sequence

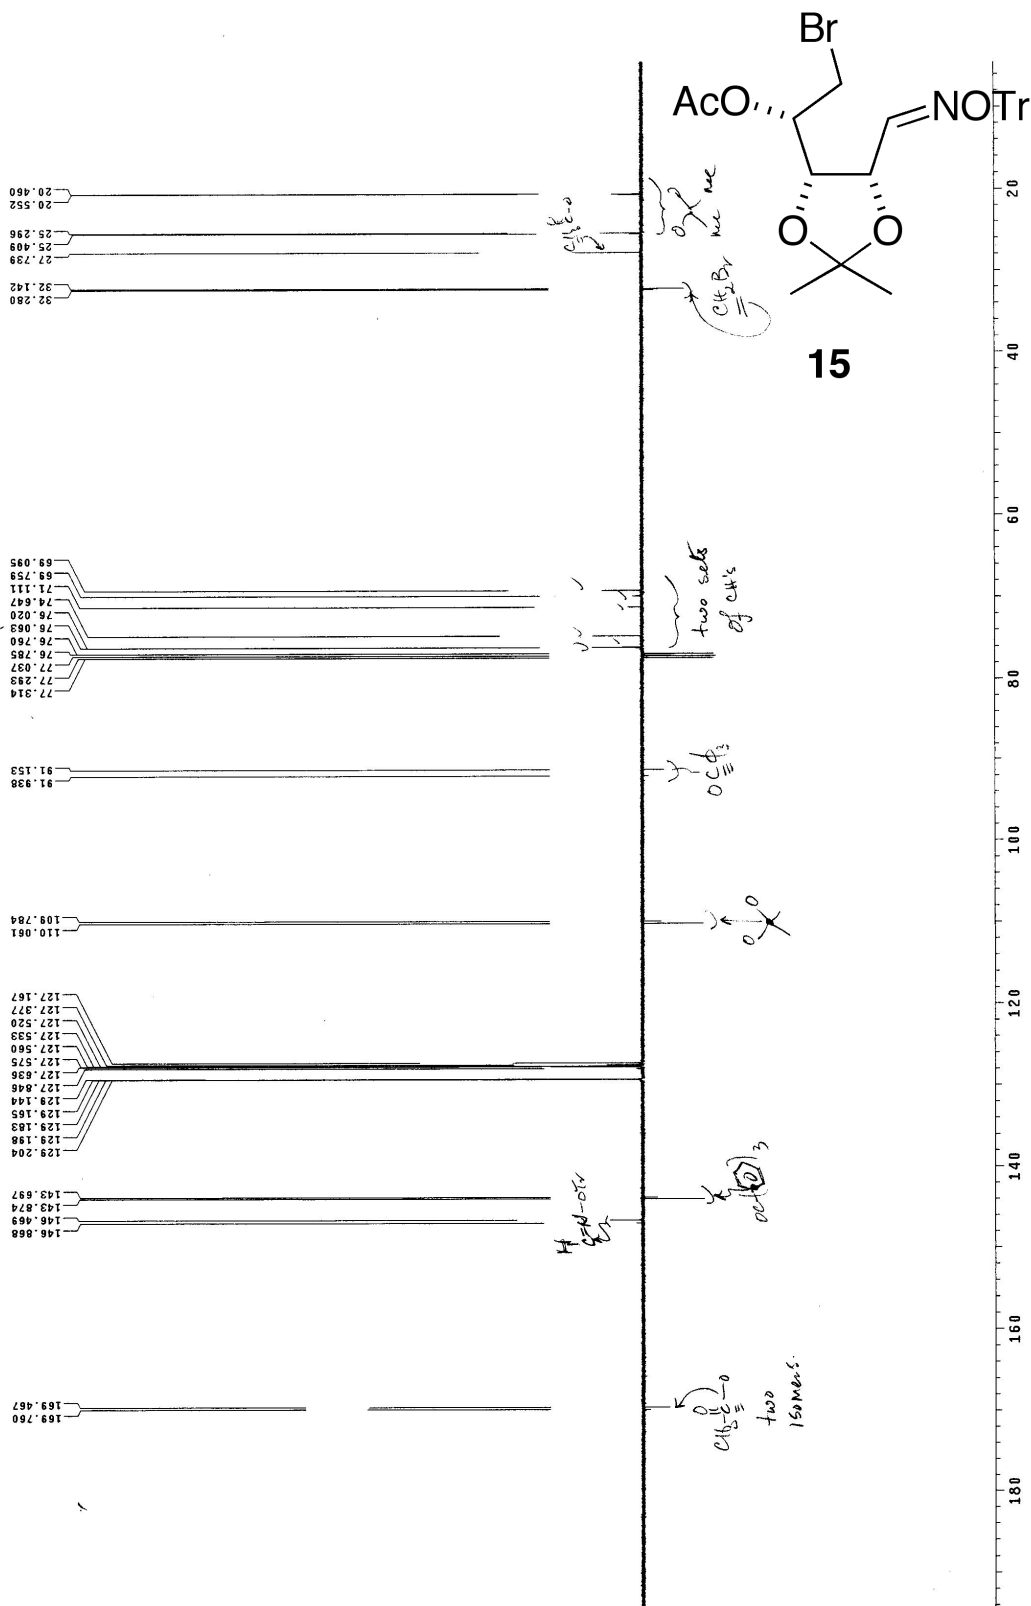

G-22  
T IN CD2CL2

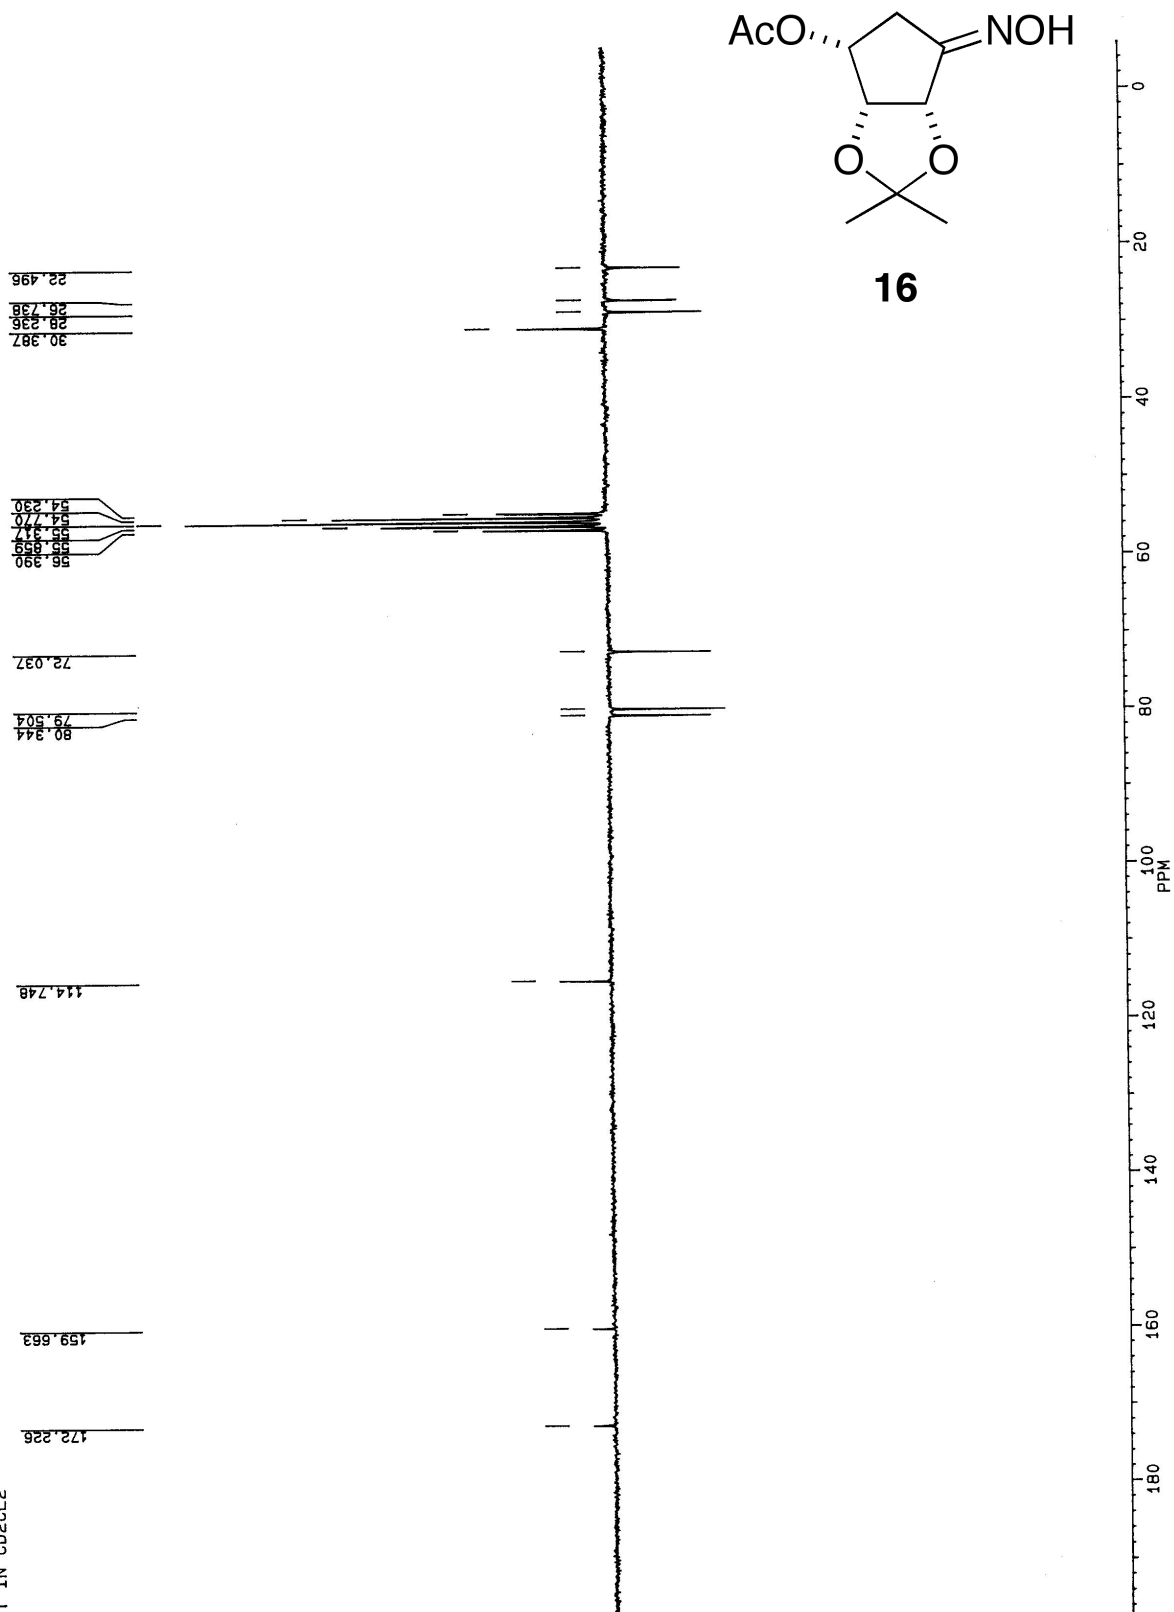

30CL3 RS6-58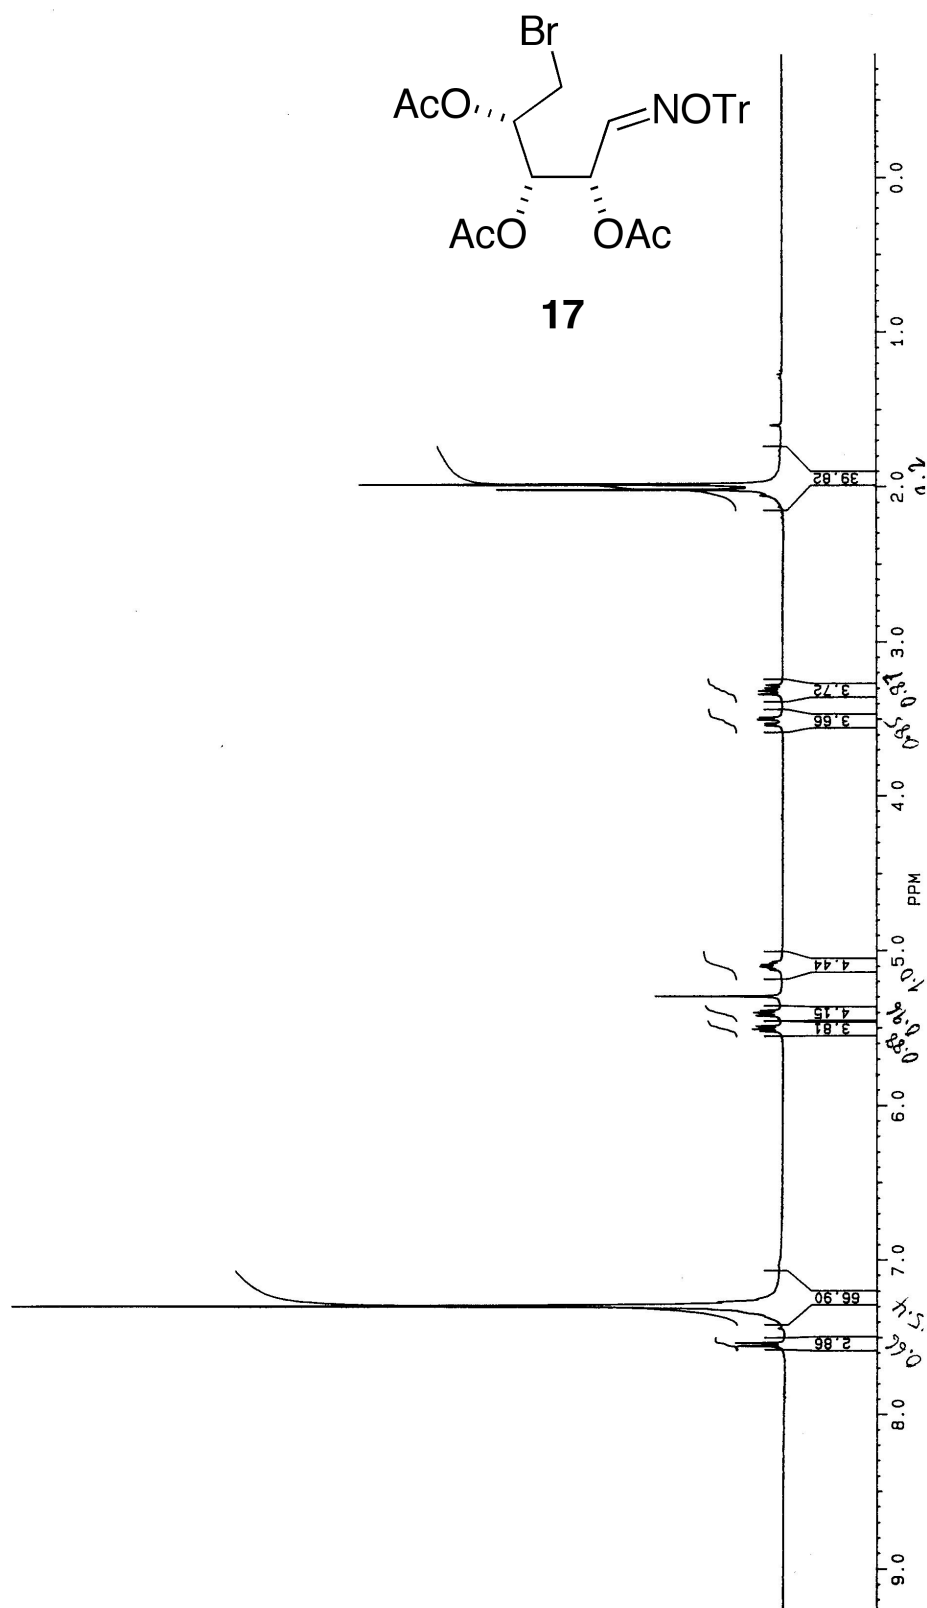

v. 44

RSH-34

MZ APT in CDCl<sub>3</sub> (ref. to CDCl<sub>3</sub> @ 77.0 ppm), temp 27.8 C -> actual temp = 27.0 C, acq4000 probe  
 CH<sub>2</sub> pos: 1.000, CH<sub>3</sub> pos: 0.000, CH<sub>2</sub> neg: 0.000, CH<sub>3</sub> neg: 0.000, CH<sub>2</sub> neg: 0.000, CH<sub>3</sub> neg: 0.000  
 time [s]: 2.0, relax. time [s]: 0.31, sweep width [Hz]: 20000, dig.res. [Hz/p2]: 0.31, spectrometer: 400

Pulse Sequence: a1

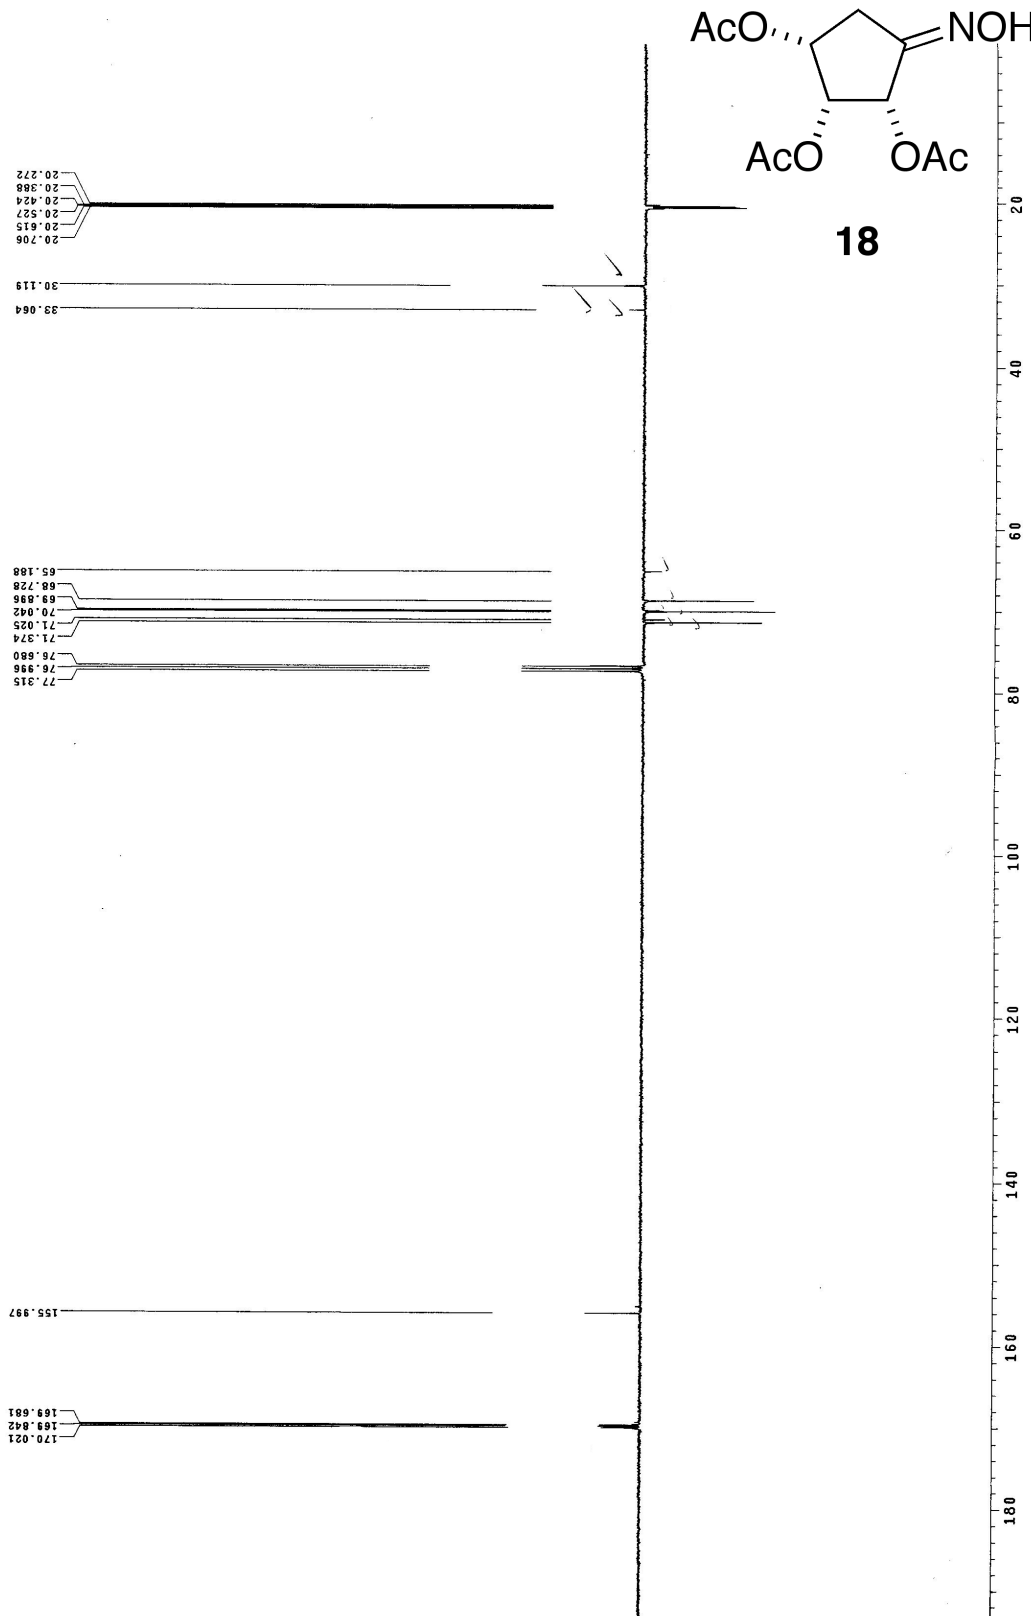

```
100 MHz APT [in CDC13 (ref. to CDC13 @ 77.0 ppm), temp 27.8 C -> actual temp = 27.0 C, asw400 probe
CH, CH3 positive; C, CH2 negative
date: Jul 31, 2001 seqfil: apt          hz/mm: 83.33      spectrometer: 400      file: exp
acq.time [s]: 2.0      relax.time [s]: 0.5      sweep width [Hz]: 20000      d1g.res. [Hz/pt]: 0.31
```

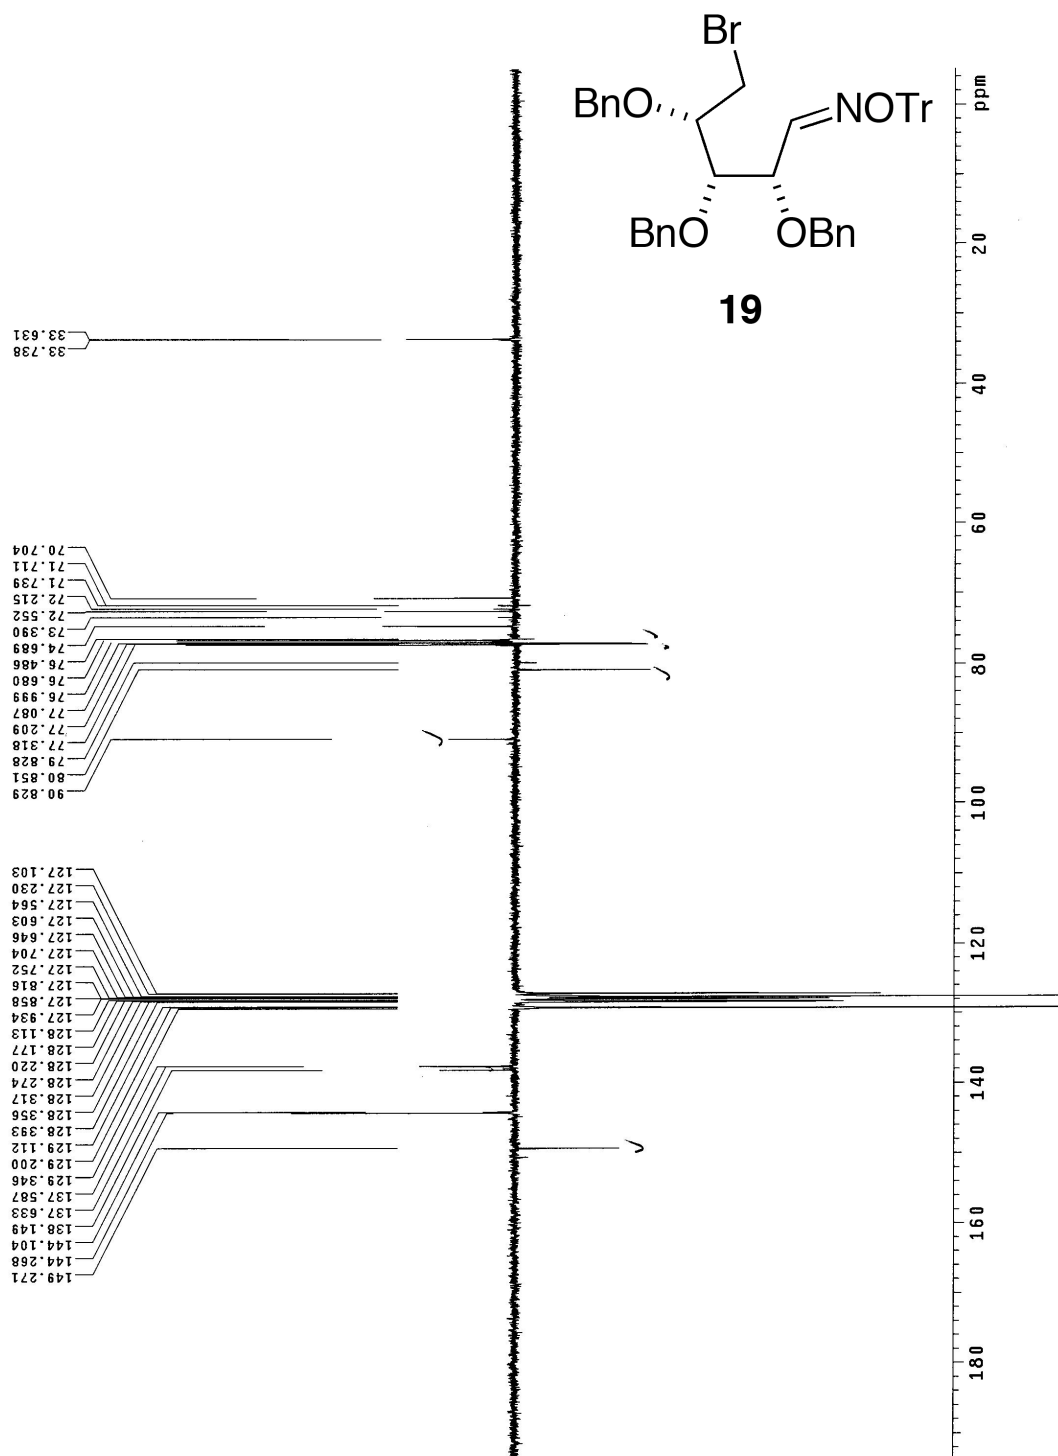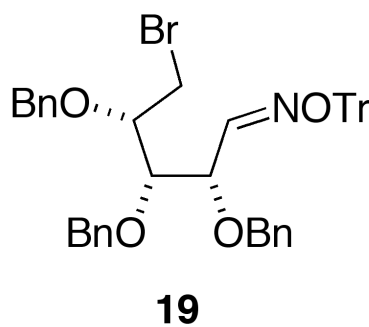

Pulse Sequence: apt

100 MHz APT in CDCl<sub>3</sub> (ref. to CDCl<sub>3</sub> @ 77.0 ppm), temp 27.8 C -> actual temp = 27.0 C, asw400 probe  
 CH, CH3 positive; C, CH2 negative  
 acq: Aug 9, 2003  
 date: Aug 9, 2003  
 file: apt  
 spectrometer: 400  
 hz/mm: 89.33  
 relaxation time [s]: 0.5  
 sweep width [Hz]: 20000  
 dig.res. [Hz/pt]: 0.31

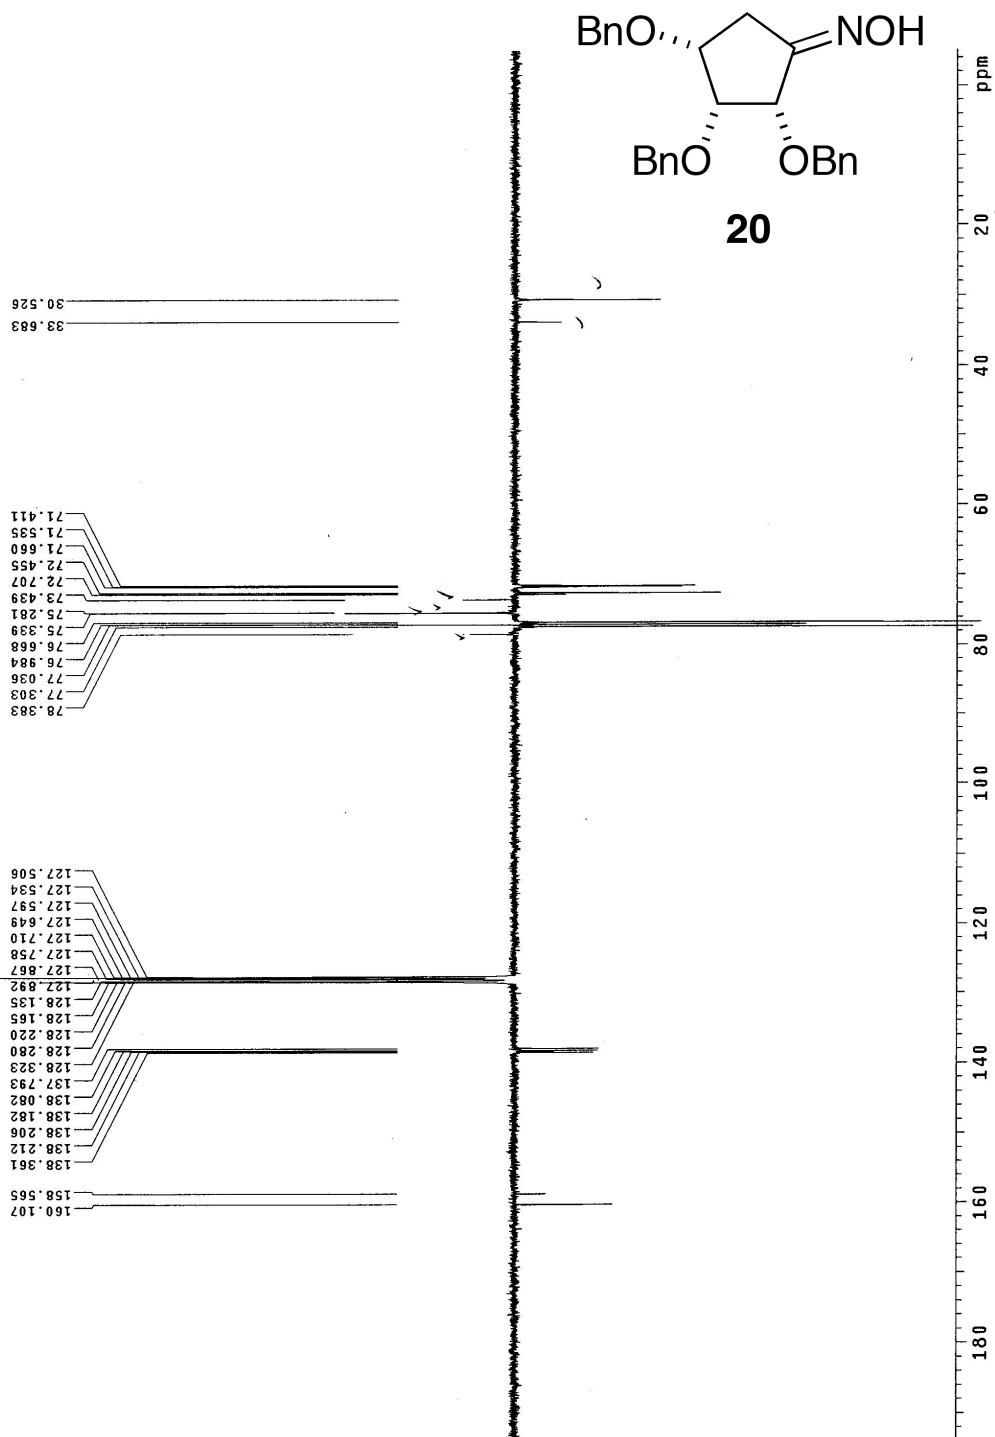









```

125 MHz APT in CDC13 (ref. to CDC13 @ 77.0 ppm), temp 27.2 C -> actual temp = 27.0 C, Sw probe
CH, CH3 positive; C, CH2 negative
date: Jul 29 2001 seqfil: apt          hz/mm: 145.69      spectrometer: lbd5
acq.time [s]: 2.0    relax.time [s]: 0.5   sweep width [Hz]: 34985     file: exp
                                     [hz/prob] : 0.53

```

Pulse Sequence: apt

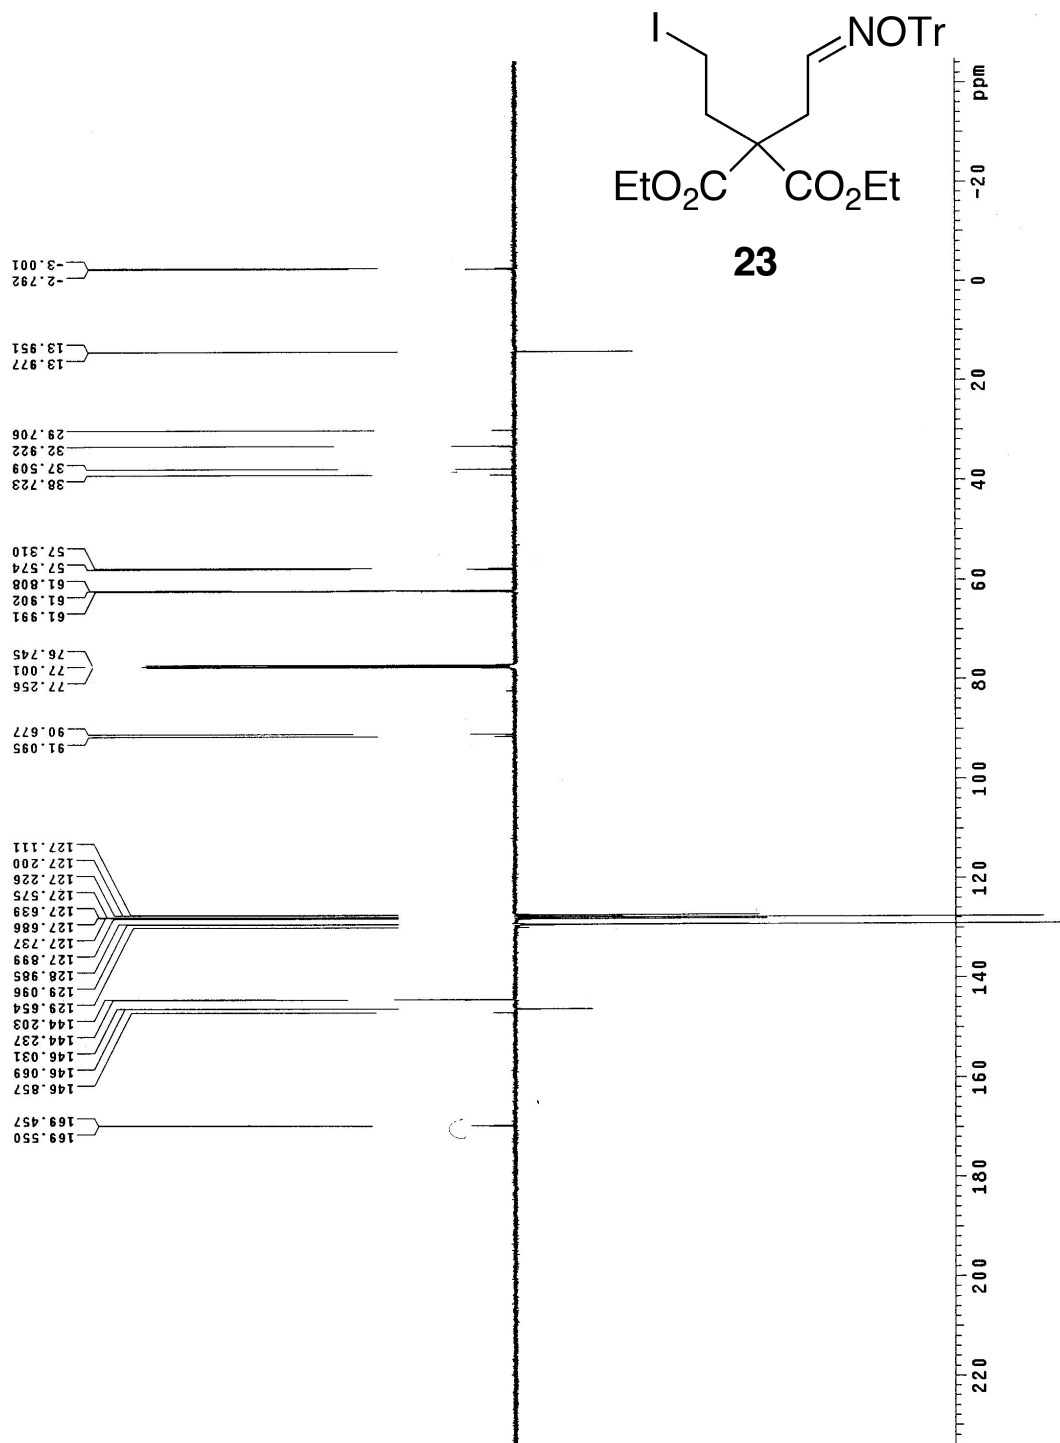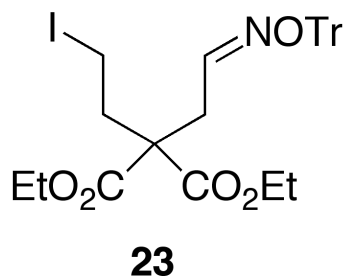



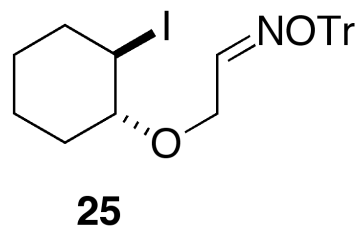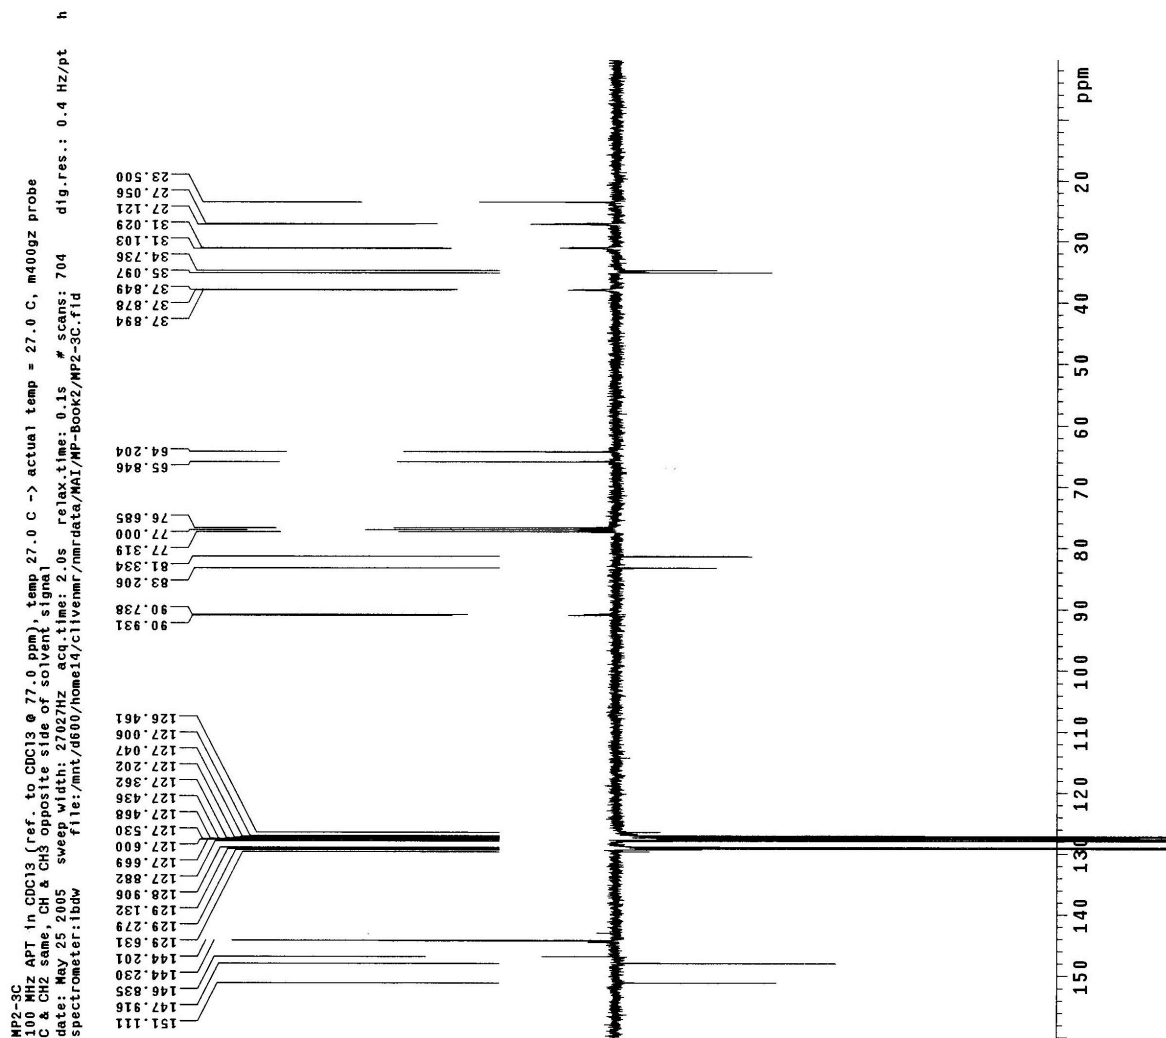

MPI-137H  
 300 MHz 1D in CDCl<sub>3</sub> (ref. to CDCl<sub>3</sub> at 2.2  
 6 ppm), temp 27.5 C -> actual temp 27.5  
 0 C, 1d probe

exp2 s2pul

|             |             |            |          |
|-------------|-------------|------------|----------|
| SAMPLE      |             | DEC. & VT  |          |
| date        | Aug 26 2006 | dfrq       | 299.971  |
| solvent     | cdcl3       | dn         | H1       |
| file        | exp         | dpwr       | 3        |
| ACQUISITION |             | dof        | 0        |
| sfrq        | 299.971     | dm         | nm       |
| tn          | H1          | dmm        | C        |
| at          | 4.999       | dmg        | 200      |
| ns          | 3600.7      | dng        | 1.0      |
| sw          | 3600.7      | drg        | 1.0      |
| fb          | not used    | homo       | n        |
| bs          | 4           | temp       | 27.5     |
| ss          | 2           | PROCESSING |          |
| tpwr        | 53          | gf         | not used |
| pw          | 3.8         | gfs        | not used |
| ql          | 0.100       | wtfile     |          |
| nt          | 673550      | proc       | lp       |
| ct          | 36          | math       | f        |
| alock       | 16          | werr       |          |
| gain        | n           | wexp       |          |
| ll          | n           | wbs        |          |
| in          | n           | wnt        | wft      |
| ds          | y           |            |          |
| hs          | nm          |            |          |
| DISPLAY     |             |            |          |
| sp          | 120.1       |            |          |
| wp          | 3080.1      |            |          |
| vs          | 47          |            |          |
| sc          | 0           |            |          |
| wdw         | 248         |            |          |
| h2nm        | 12.83       |            |          |
| ls          | 28187.75    |            |          |
| rfl         | 2598.2      |            |          |
| rfp         | 2171.8      |            |          |
| th          | 3           |            |          |
| ins         | 12.000      |            |          |
| nm          |             |            |          |
| ph          |             |            |          |

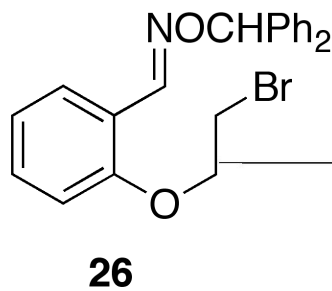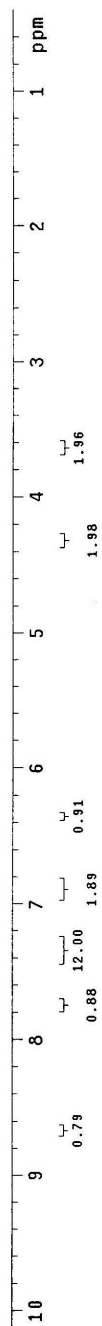

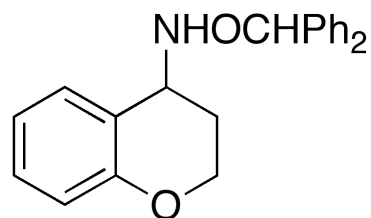

27

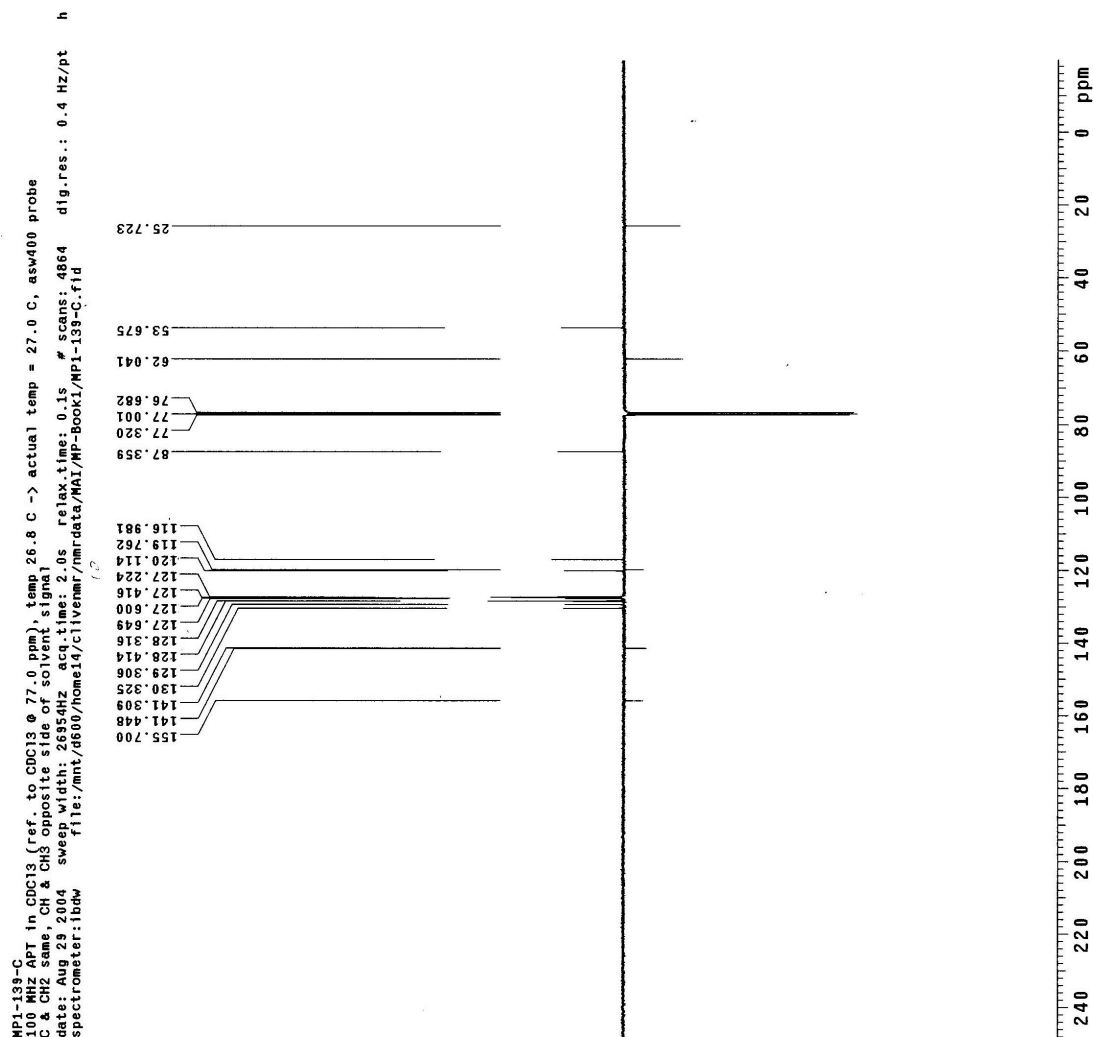

MP2-85C  
100 MHz APT in CDCl<sub>3</sub> (ref. to CDCl<sub>3</sub> @ 77.0 ppm), temp 27.0 C -> actual temp = 27.0 C, m400gz probe  
C & CH<sub>2</sub> same, CH & CH<sub>3</sub> opposite side of solvent signal  
date: Jul 11 2005 sweep width: 27027Hz acq.time: 2.0s relax.time: 0.1s # scans: 192 dfg.res.: 0.4 Hz/pt  
spectrometer:m400 file:exp

Pulse Sequence: apt

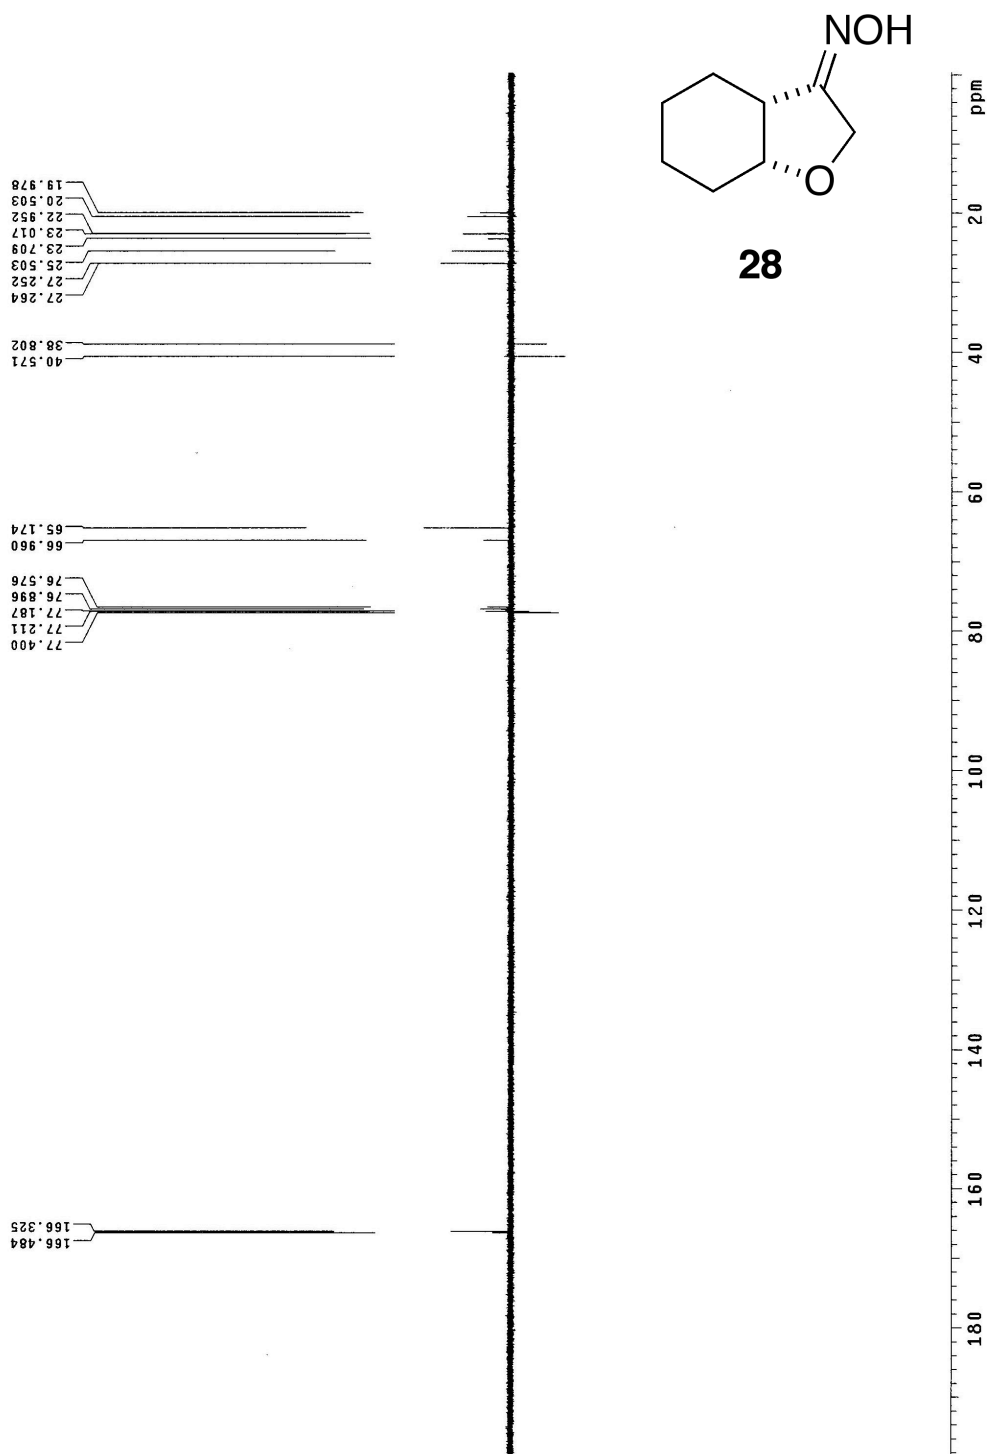

Pulse Sequence: apt

m100 MHz APT in CDCl<sub>3</sub> (ref. to CDCl<sub>3</sub> @ 77.0 ppm), temp 27.0 C -> actual temp = 27.0 C, m400gz probe  
C & CH<sub>2</sub> same, CH & CH<sub>3</sub> opposite side of solvent signal  
date: Aug 24 2006 sweep width: 27027Hz acq.time: 2.0s relax.time: 0.1s # scans: 1560 dig.res.: 0.4 Hz/pt  
spectrometer: lbd5 file:/mnt/d600/home14/cilvenmr/nmrdata/NAI/S-Iodo-o-tritylamineCl.fid

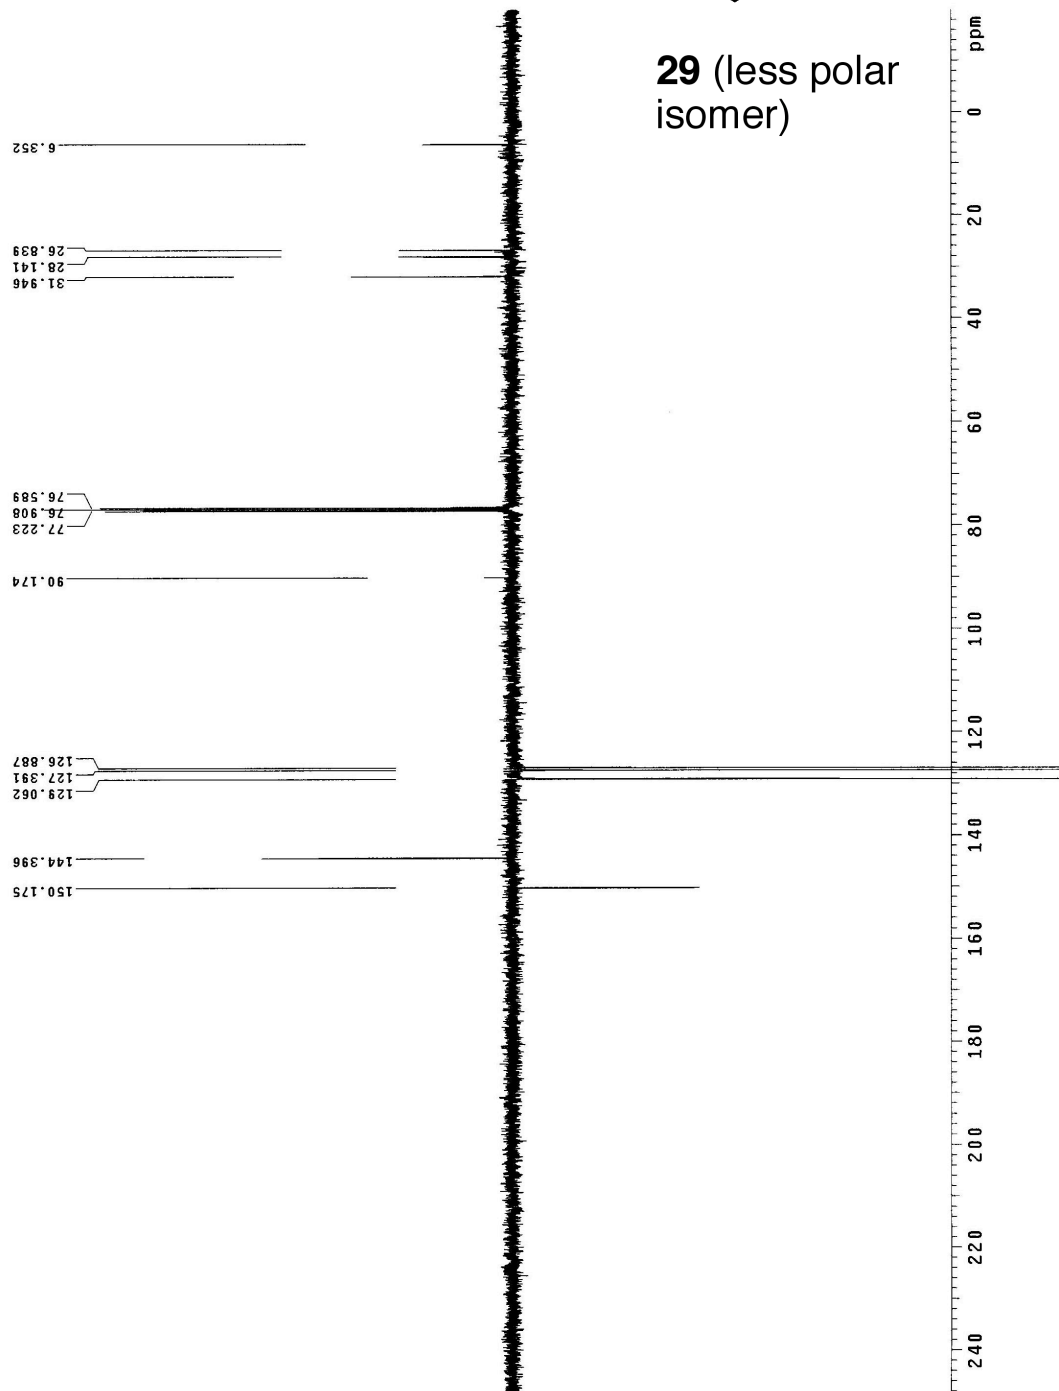



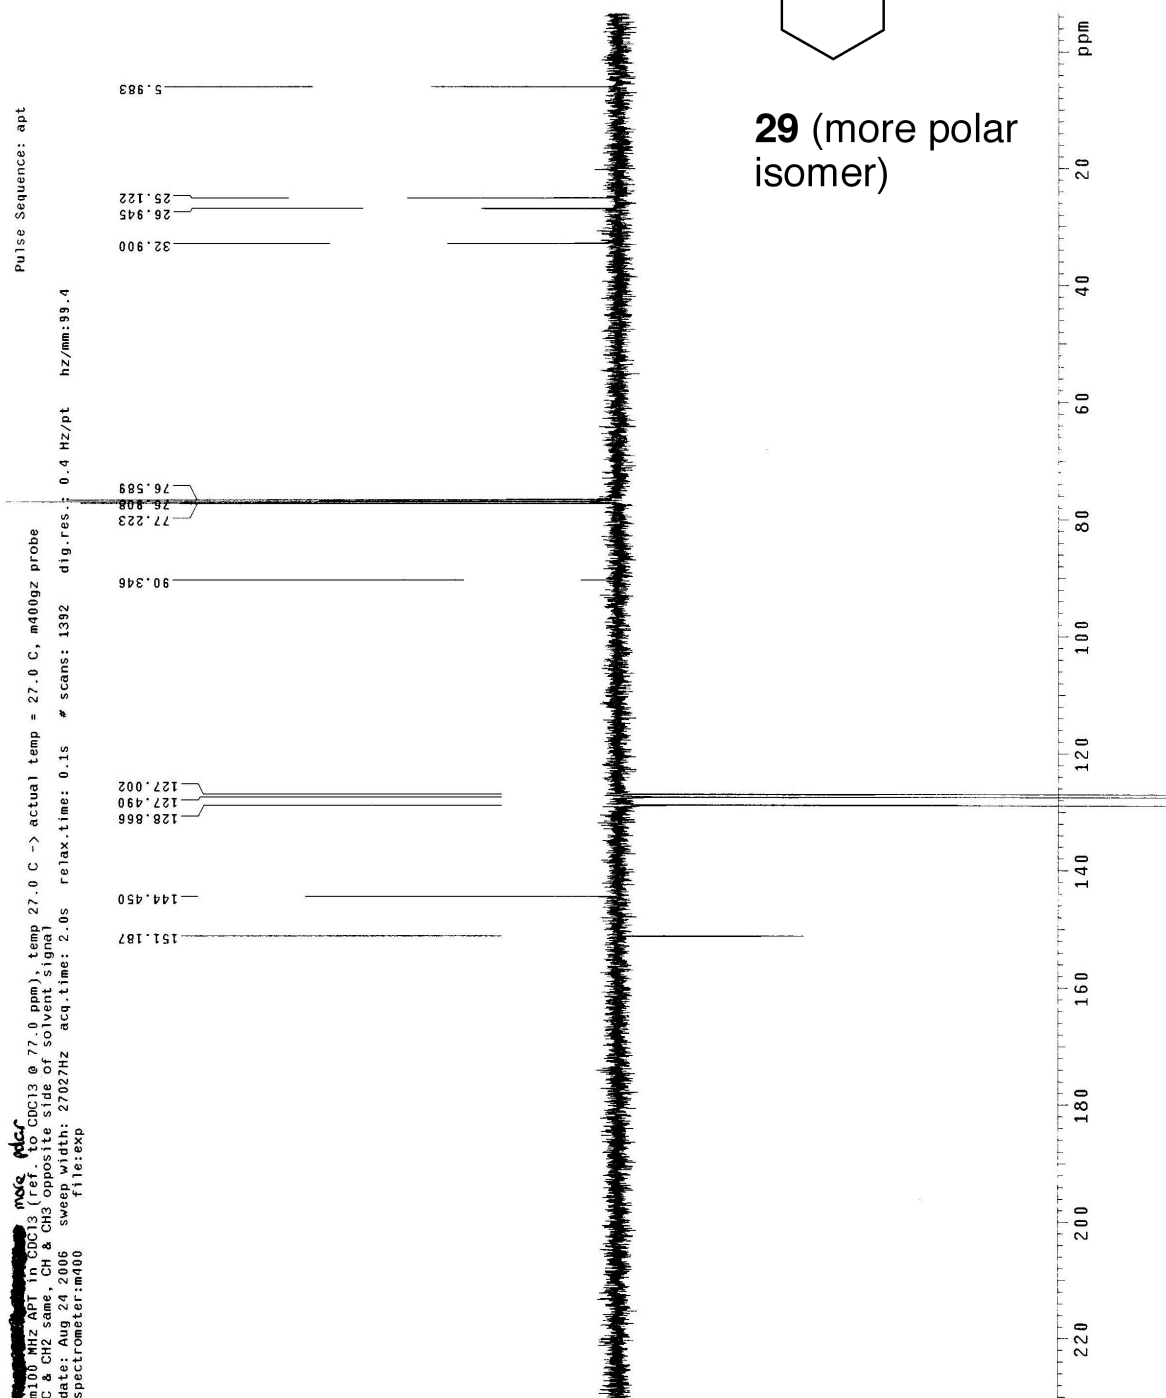

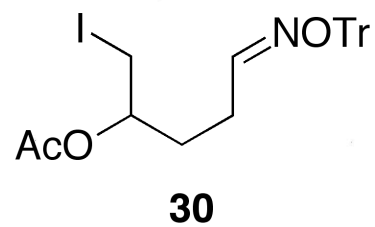

MP2-95H  
400 MHz 1D in CDC13 (ref. to CDC13 @ 7.26 ppm), temp 27.0 C -> actual temp = 27.0 C, m400gz probe

Solvent: cdc13  
Temp: 27.0 C / 300.1 K  
File: MP2-95H  
INOVA-500 "1bdw"

Relax. delay 3.000 sec  
Pulse 45.0 degrees  
Acq. time 1.999 sec  
Date\_ 20110216  
Time 14:11:02  
OBSERVE H1 400.3981759 MHz  
DATA PROCESSING  
FT size 131072  
Total time 1 min, 30 sec

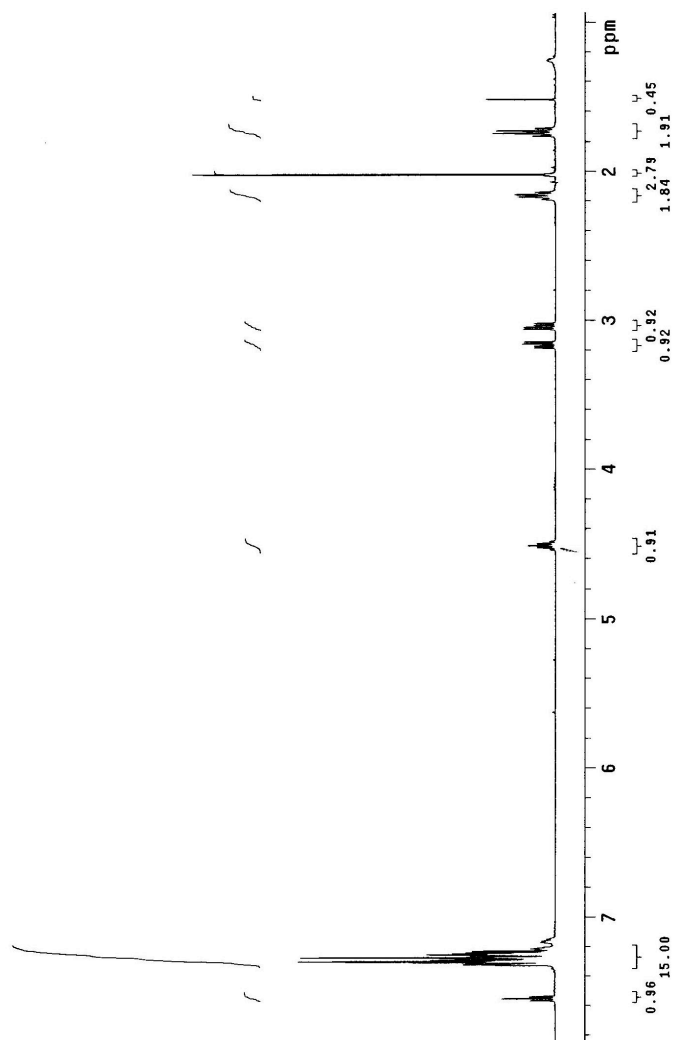

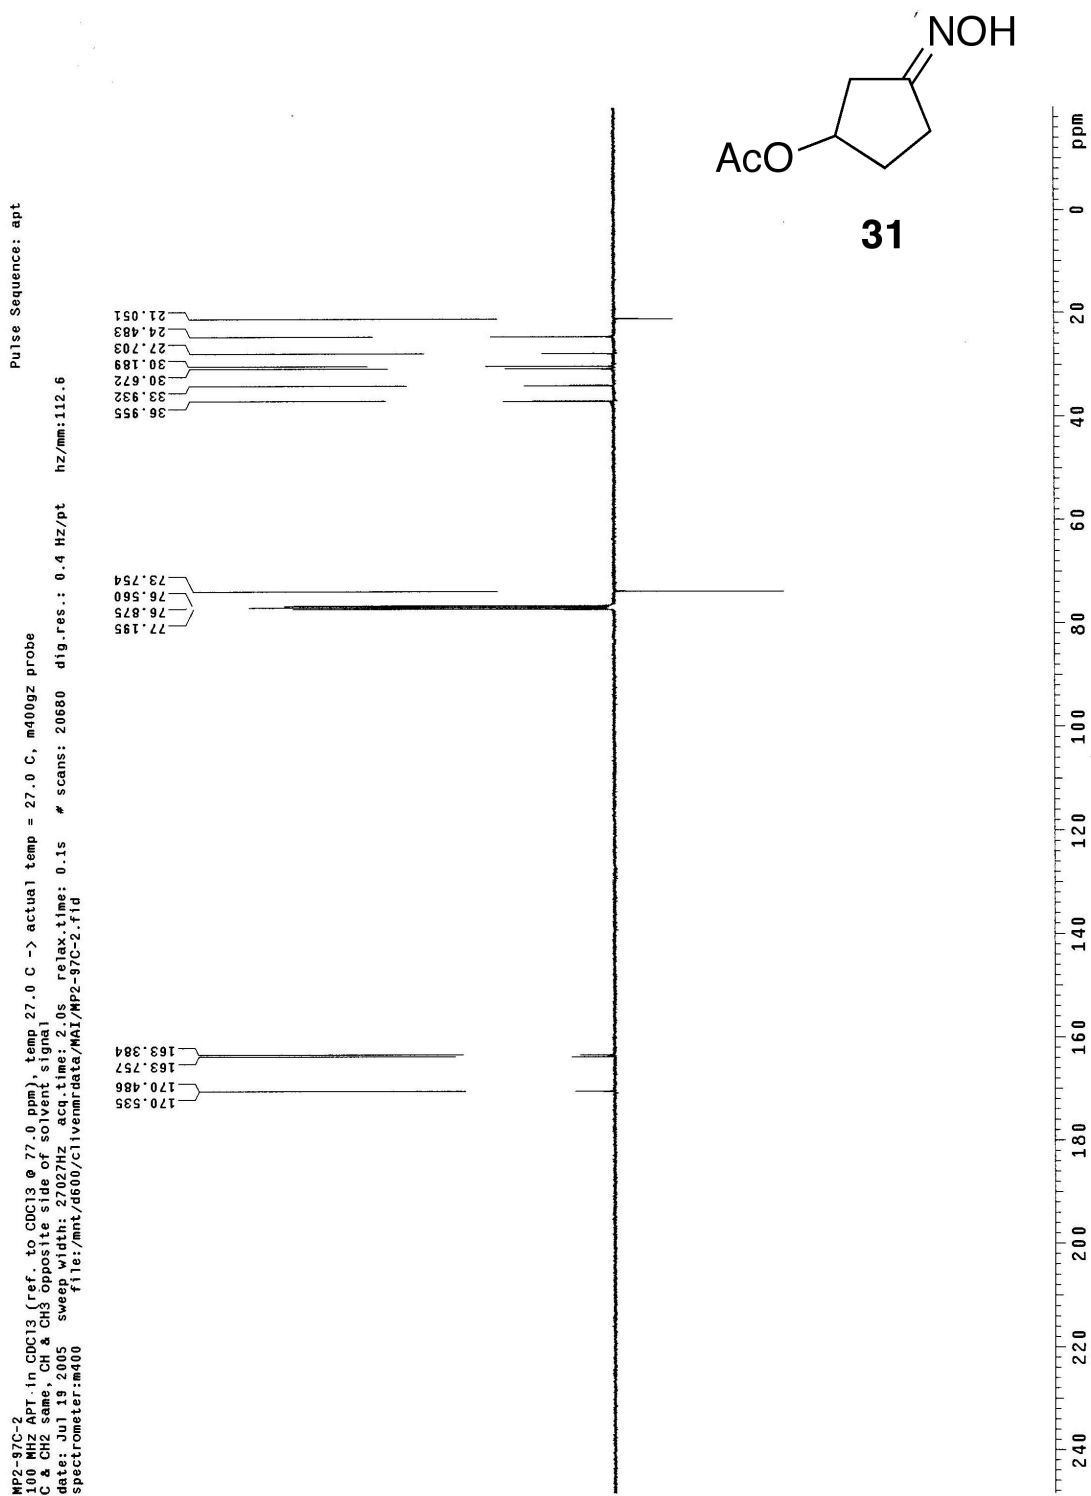

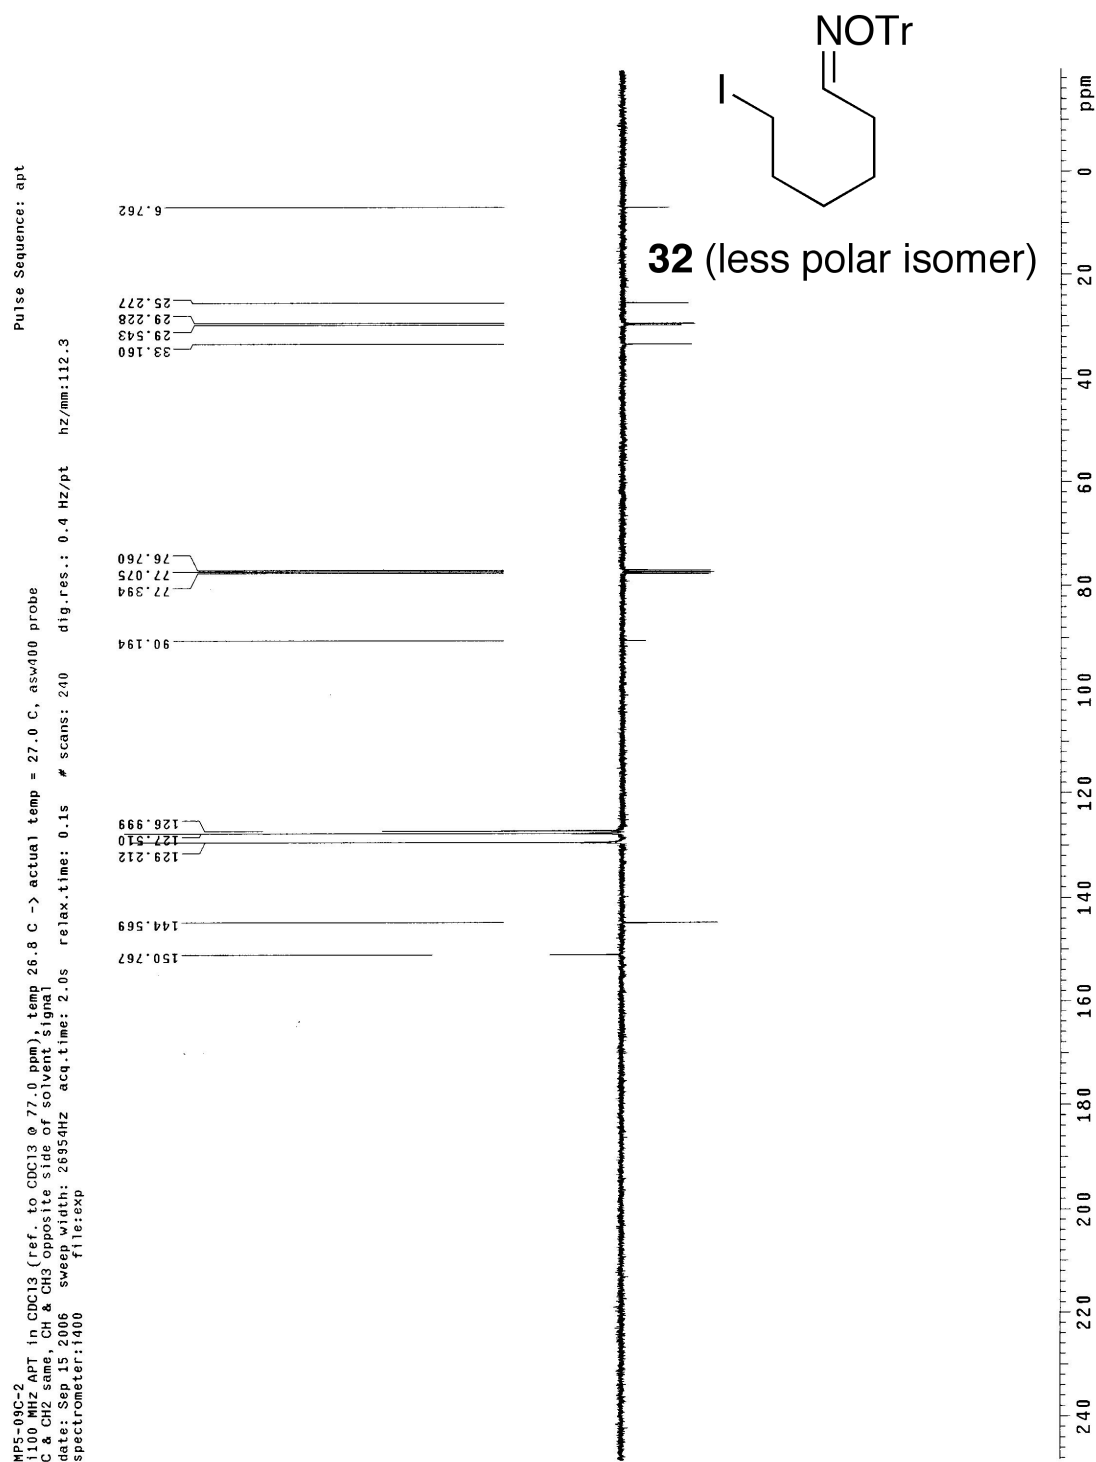

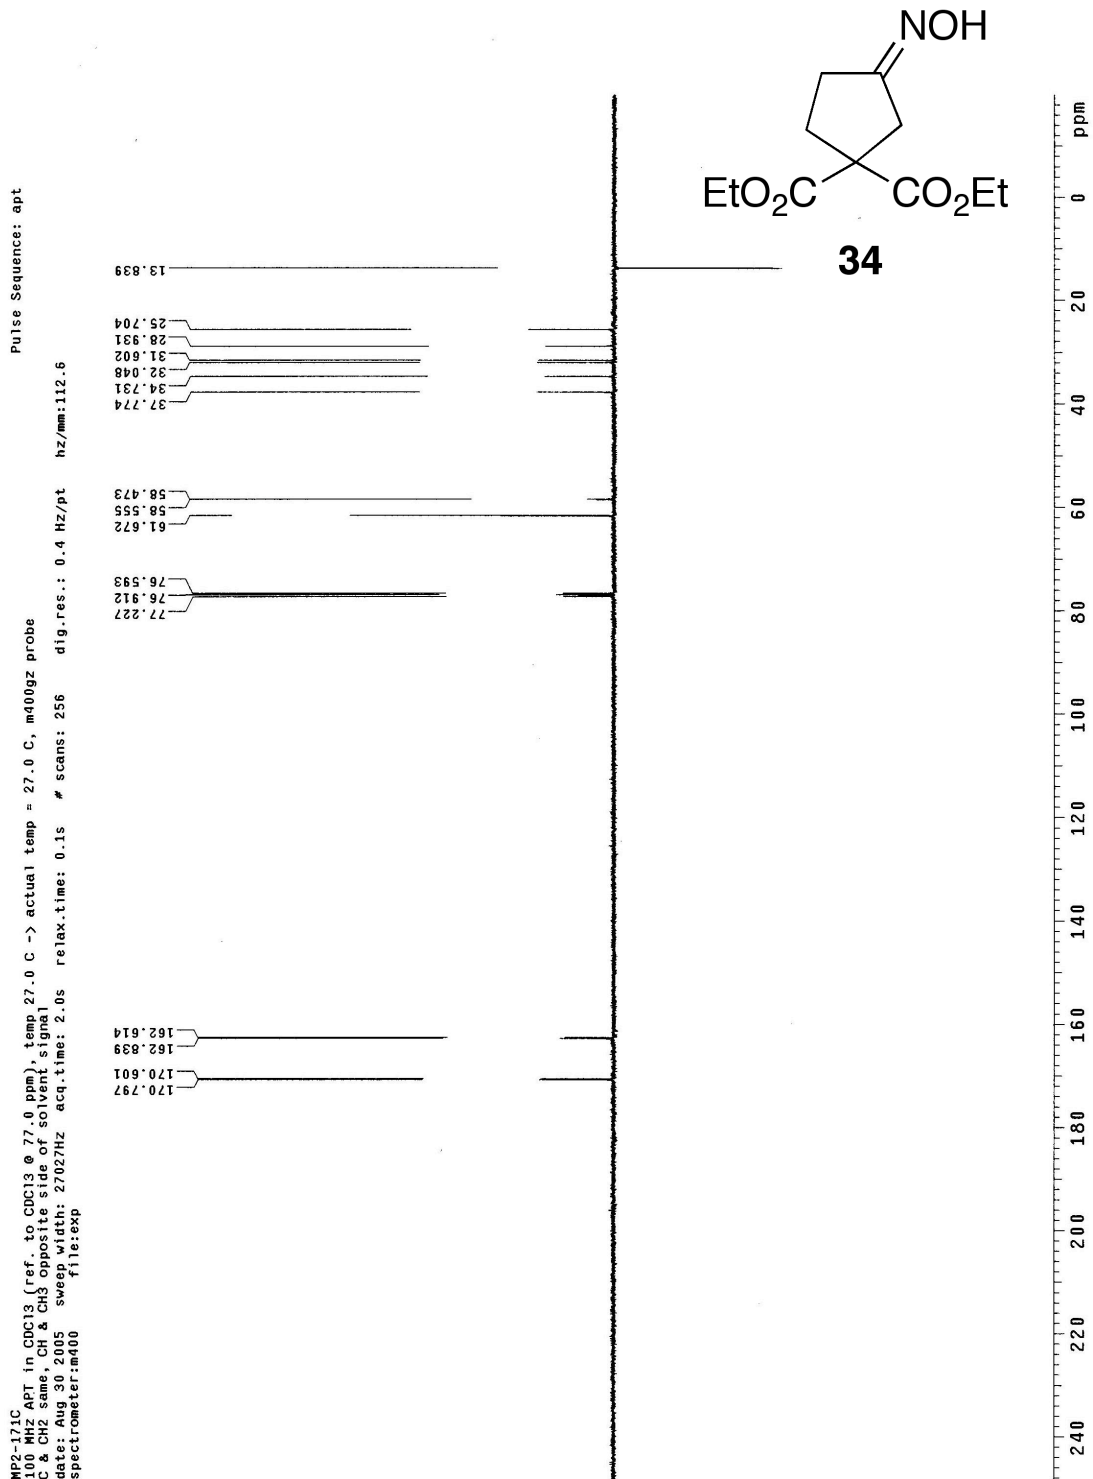

NP3-55C

100 MHz APT in CDCl<sub>3</sub> (ref. to CDCl<sub>3</sub> @ 77.0 ppm), temp 26.8 C -> actual temp = 27.0 C, asw400 probe  
C & CH<sub>2</sub> same, CH & CH<sub>3</sub> opposite side of solvent signal

Pulse Sequence: apt

date: Nov 10 2005 sweep width: 26954Hz acq.time: 2.0s relax.time: 0.1s # scans: 1456 dig.res.: 0.4 Hz/pt hz/mm: 85.6  
spectrometer: 400 file: exp

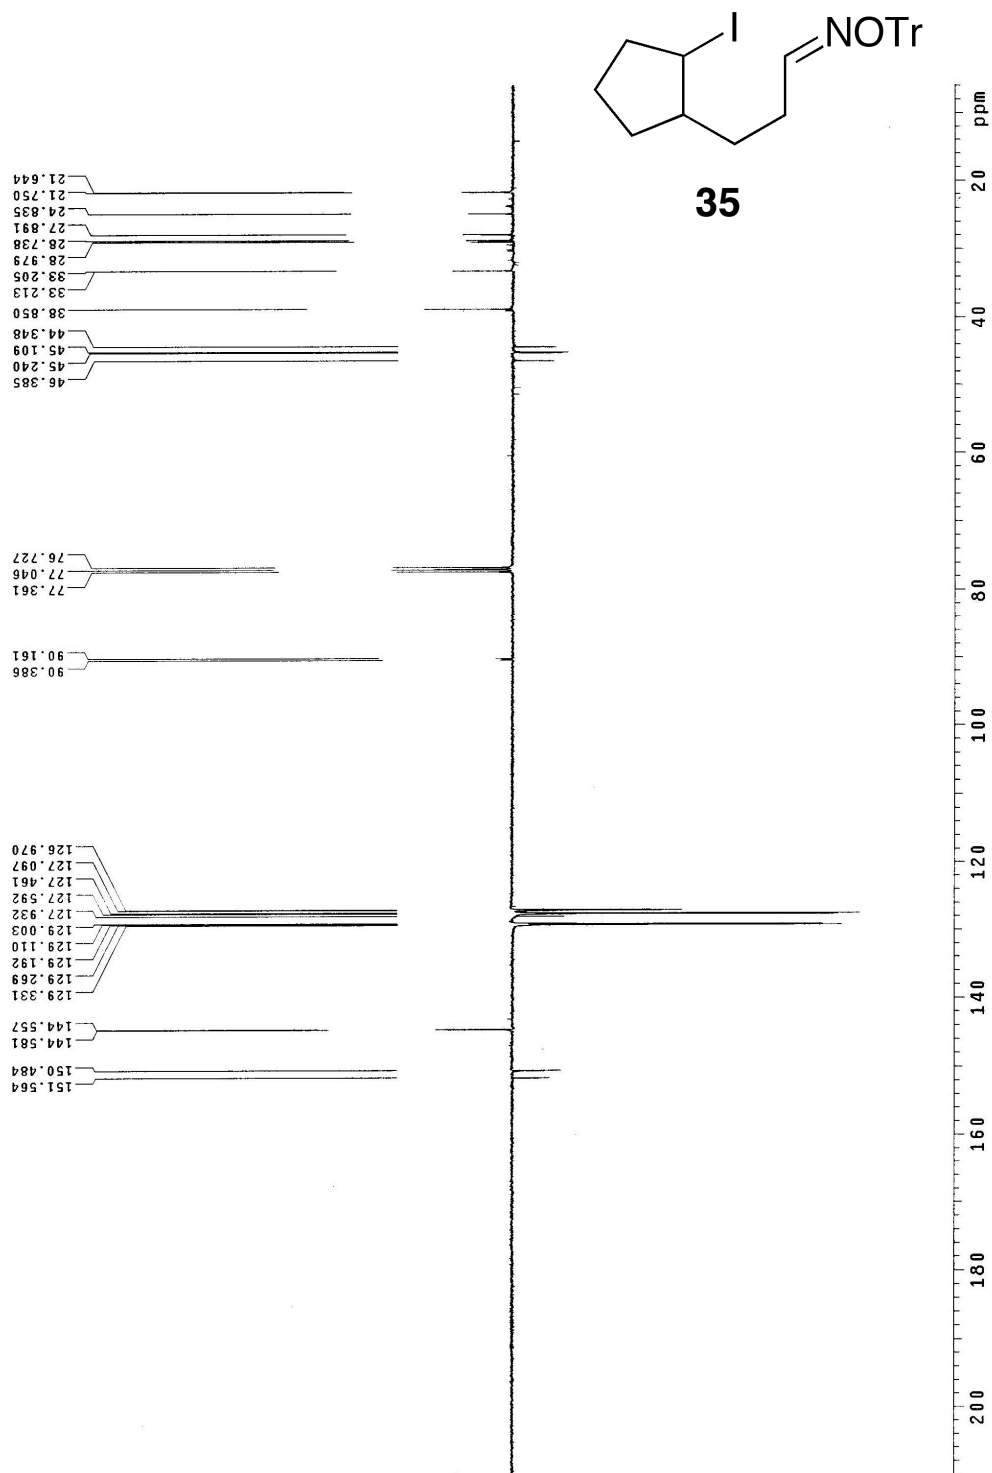

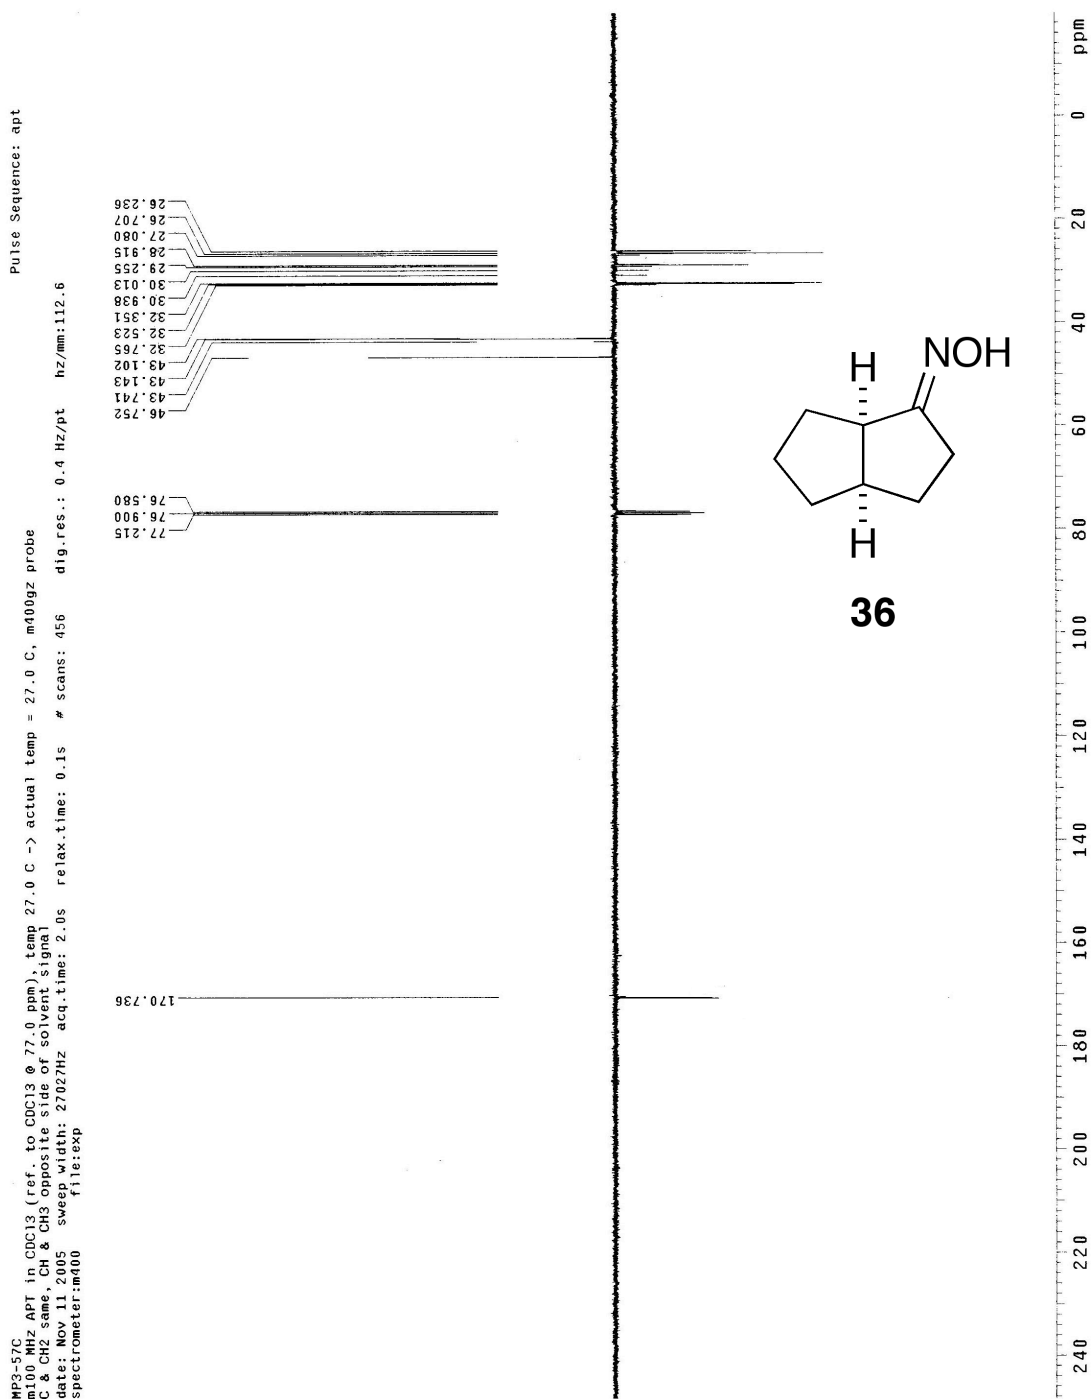

MP3-145H  
m500 MHz 1D in CDCl3 (ref. to CDCl3 @ 7.26 ppm), temp 27.0 C -> actual temp = 27.0 C, m400gz probe  
date: Jan 17 2006 sweep width: 4803Hz acq time: 2.0s relax time: 3.0s # scans: 16 dig.res.: 0.1 Hz/pt hz/mm: 20.0  
spectrometer: m400 file: exp Pulse Sequence: s2pul

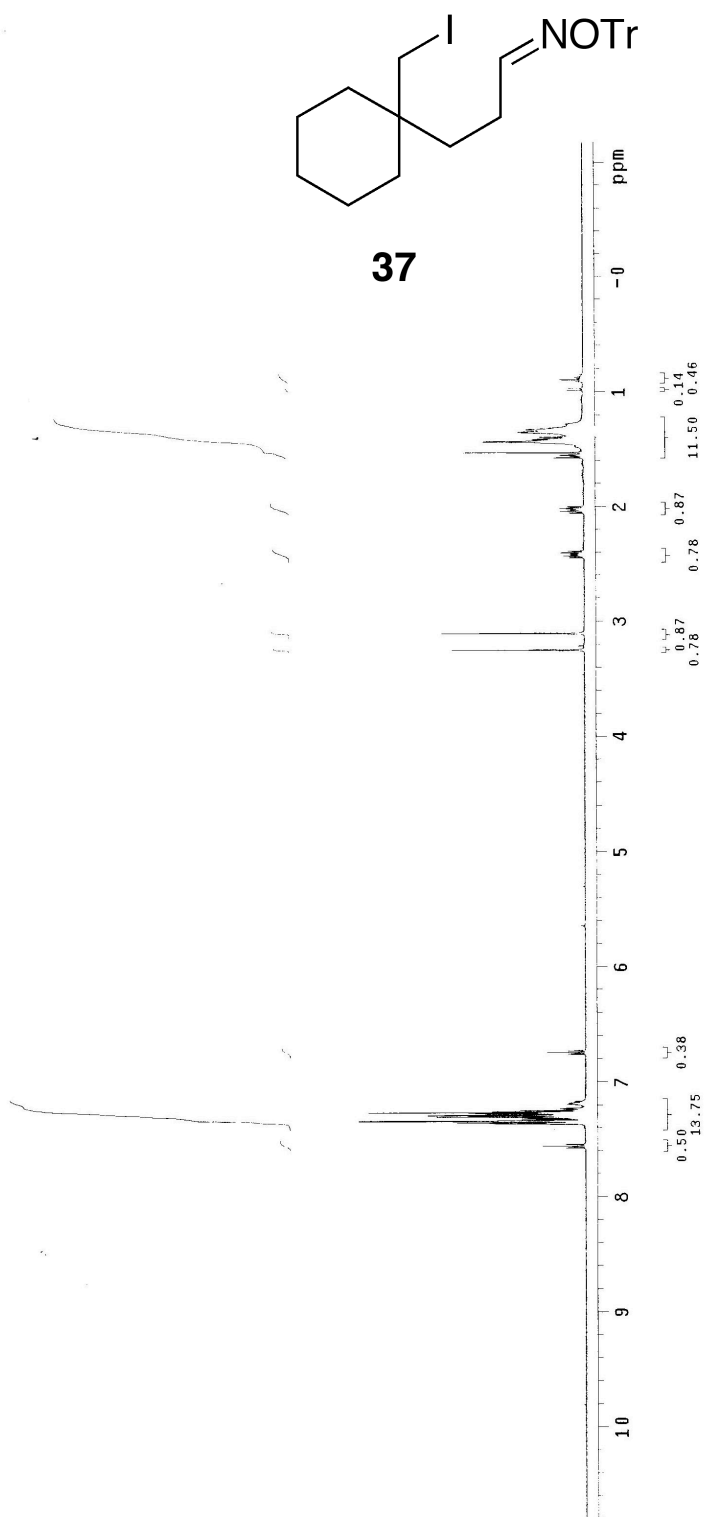



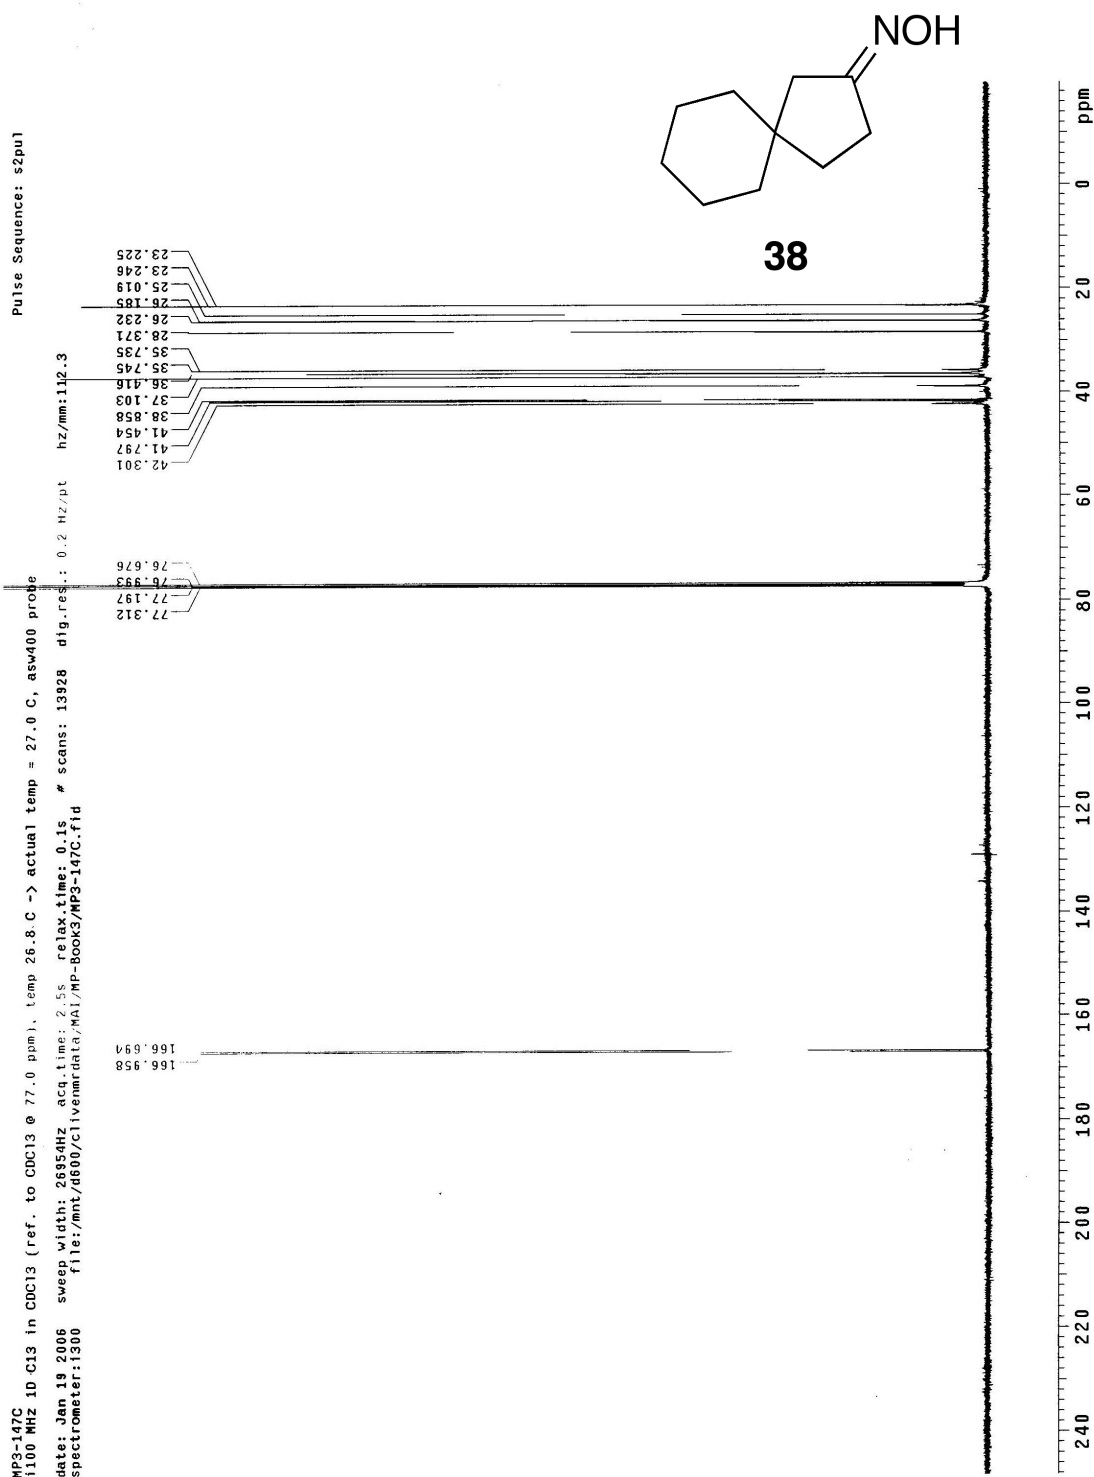

RS G-16

125 MHz APT in CDCl<sub>3</sub> (ref. to CDCl<sub>3</sub> @ 77.0 ppm), temp 27.2 C -> actual temp = 27.0 C, sw probe CH, CH3 positive; C, CH2 negative  
 date: Jul 13, 2001 seq: 104.17 spectrometer: hds5 f1la: e3g  
 acq: time [s]: 2.0 seq: relax: time [s]: 0.5 sweep width [Hz]: 25000 d1: 0.38

Pulse Sequence: apt

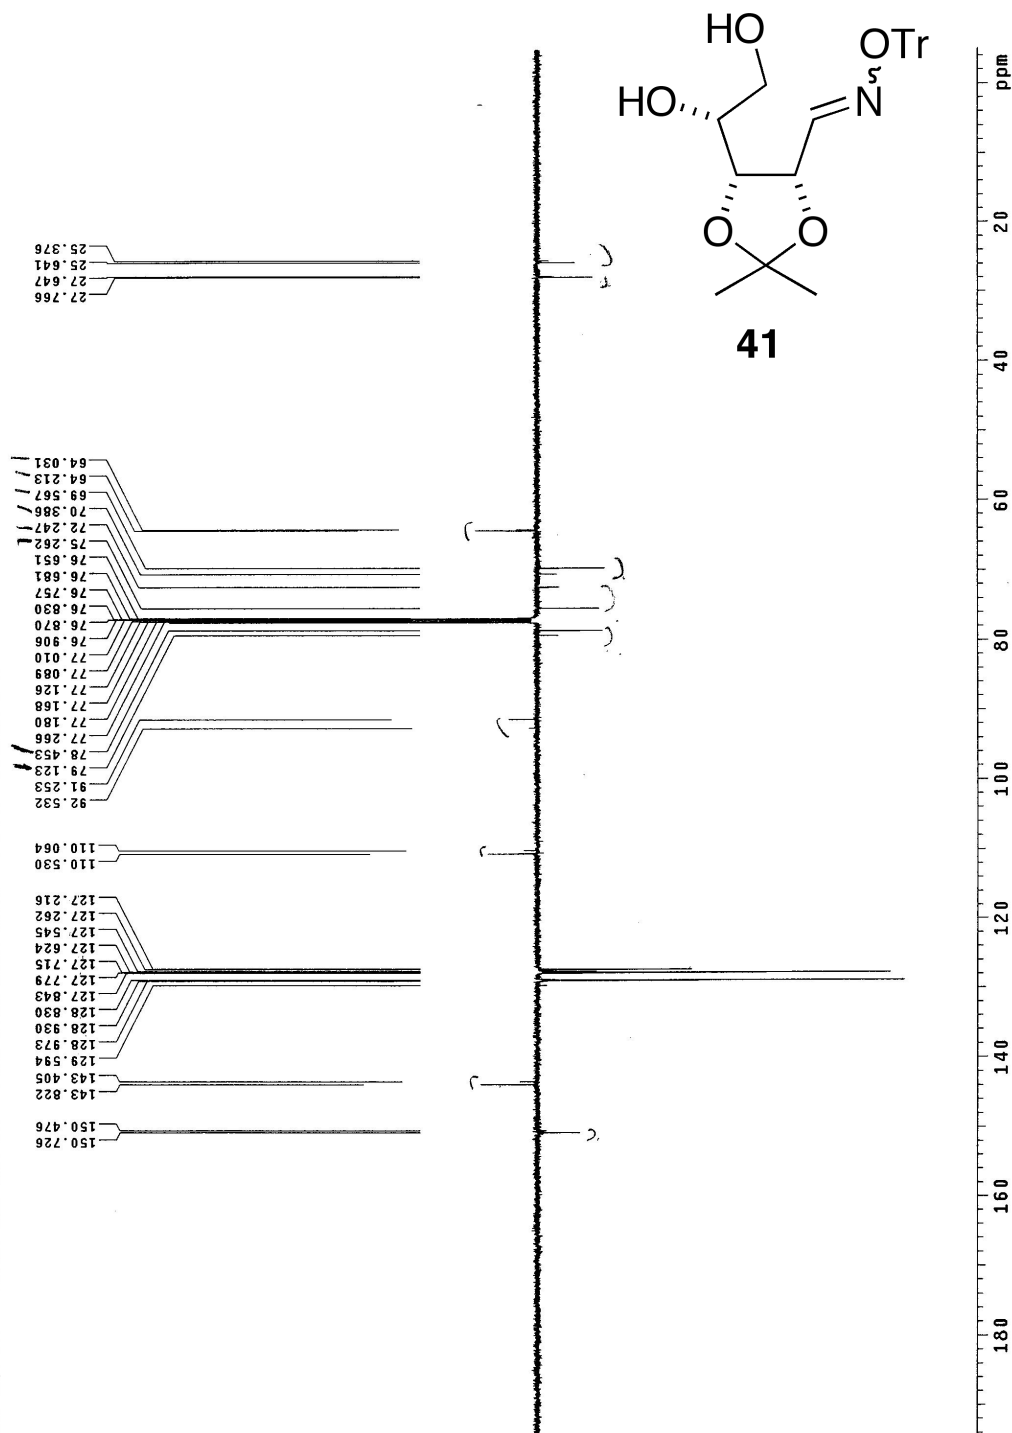

6-20  
1 IN CDCl<sub>3</sub>

27.667  
25.526

36.814

79.074  
77.035  
76.369  
75.107  
69.827

91.228

110.512

128.925  
127.766  
127.510

143.982

149.757

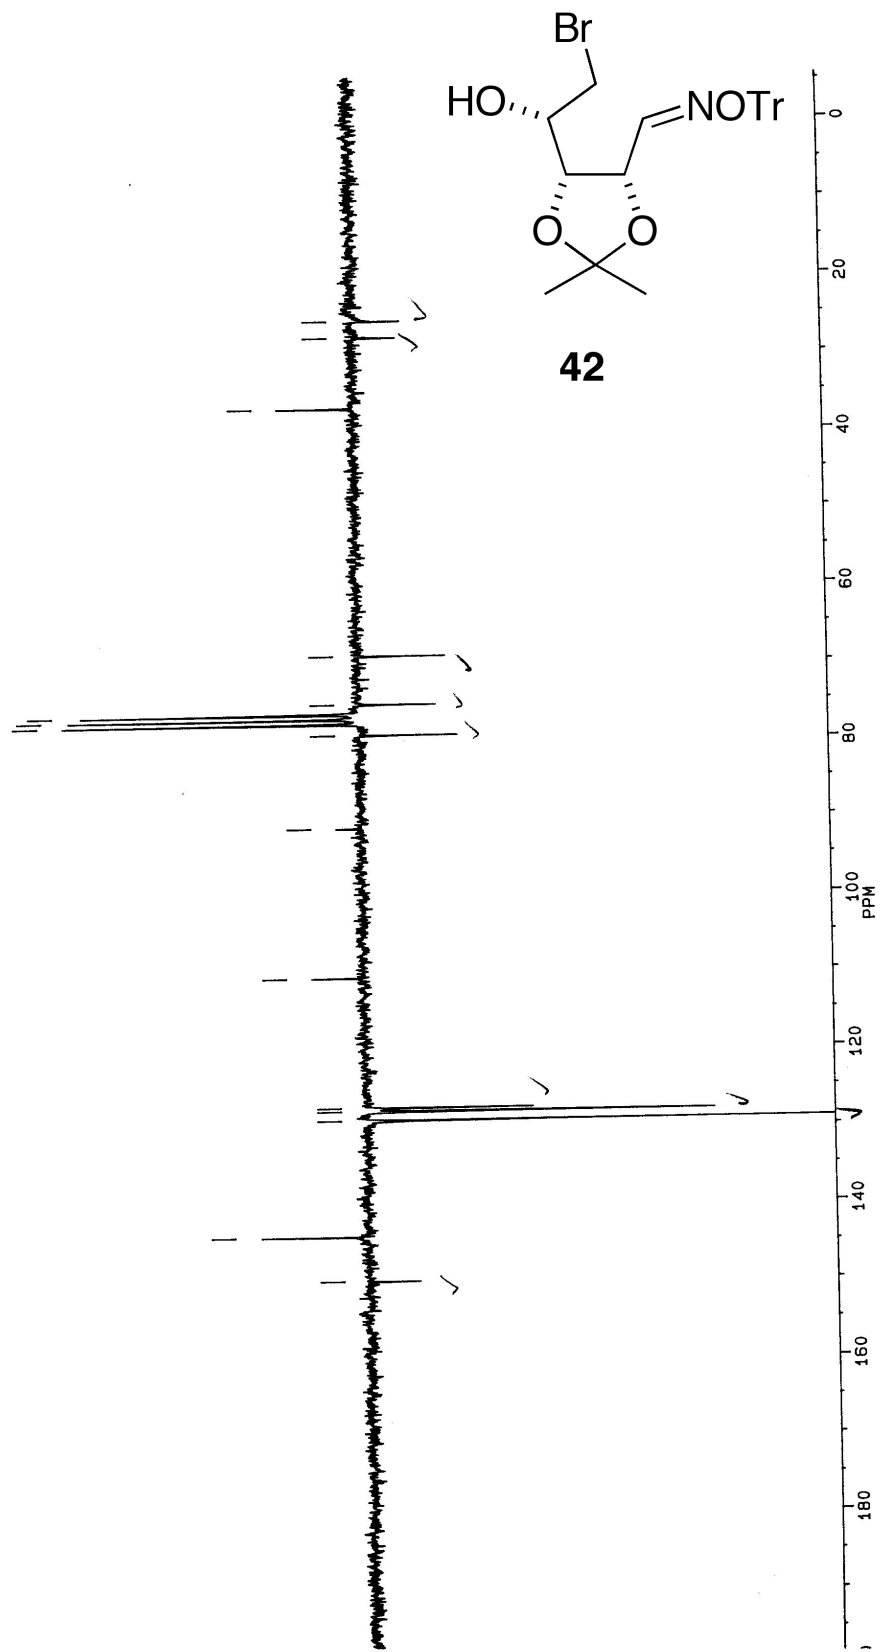

RS H-23

Pulse Sequence: apt

125 MHz APT in CDCl<sub>3</sub> (ref. to CDCl<sub>3</sub> @ 77.0 ppm), temp 27.2 C -> actual temp = 27.0 C, sw probe CH, CH3 positive; C, CH2 negative  
 date: Jul 23 2006 seq: 104.17 spectrometer: jbd5 file: ex8  
 aq: time [s]: 2.00 relax: time [s]: 0.5 sweep width [Hz]: 25000 dig: res. [Hz/pt]: 0.38

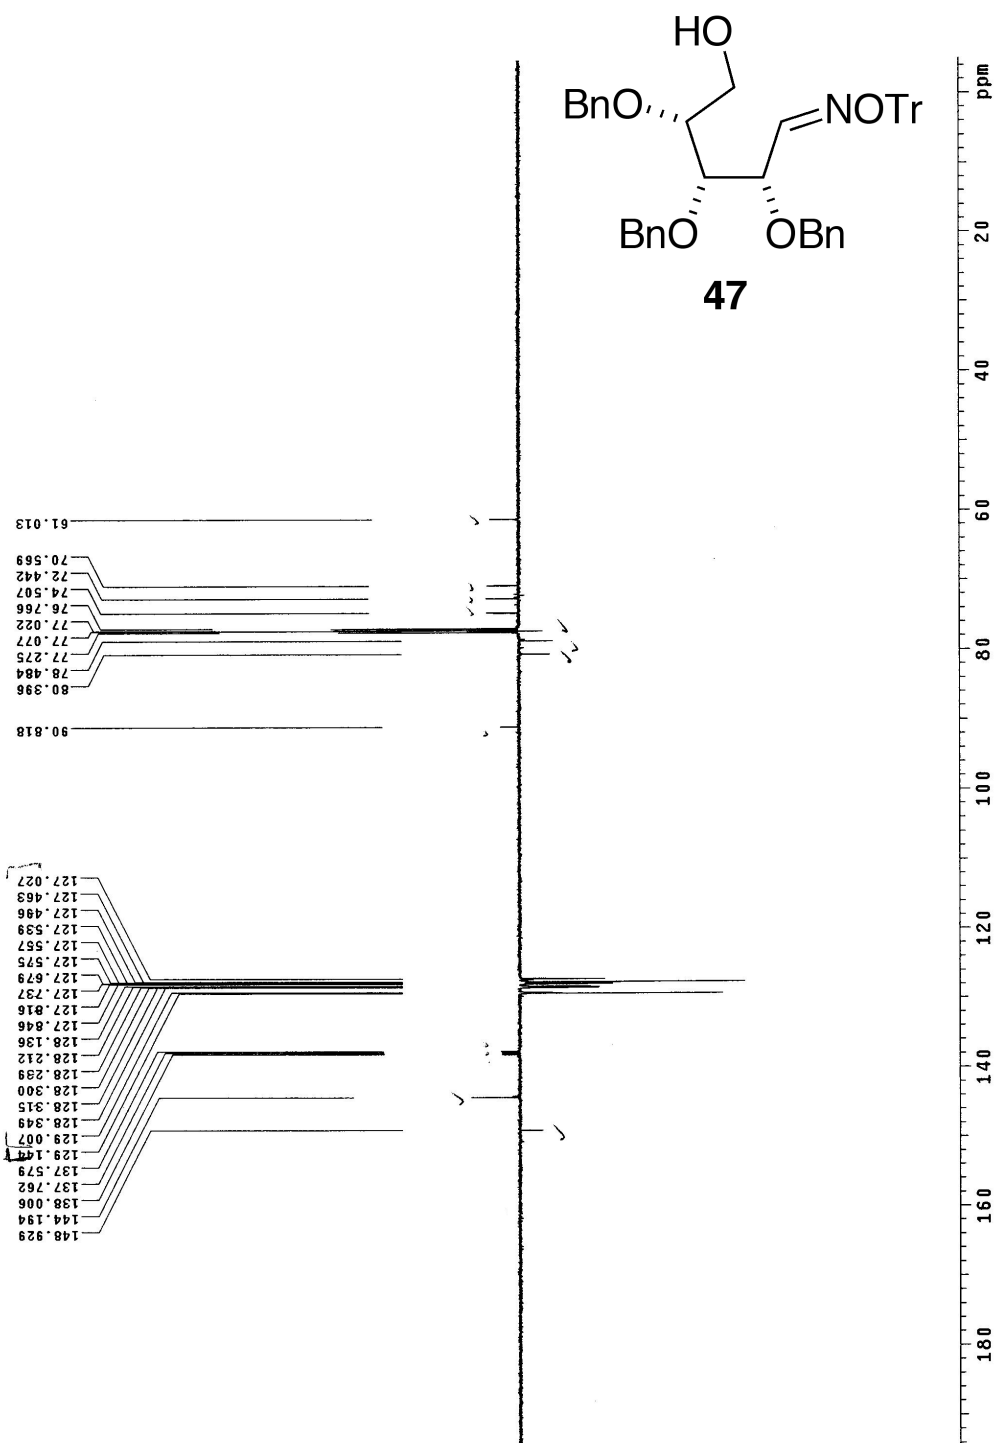

**RS G-71**

Pulse Sequence: apt  
100 MHz APT (in CDCl<sub>3</sub> (ref. to CDCl<sub>3</sub> @ 77.0 ppm), temp 27.8 C -> actual temp = 27.0 C, asw400 probe  
CH, CH3 positive; C, CH2 negative  
acq time [s]: 2.00 relax time [s]: 0.50 sweep width [Hz]: 125.08 spectrometer: 400  
file: /mnt/d600/nmr/abdata/Clive/Subedi/Bromocyclohexane-aldehyde-cl3.fld  
dig.res. [Hz/pt]: 0.48

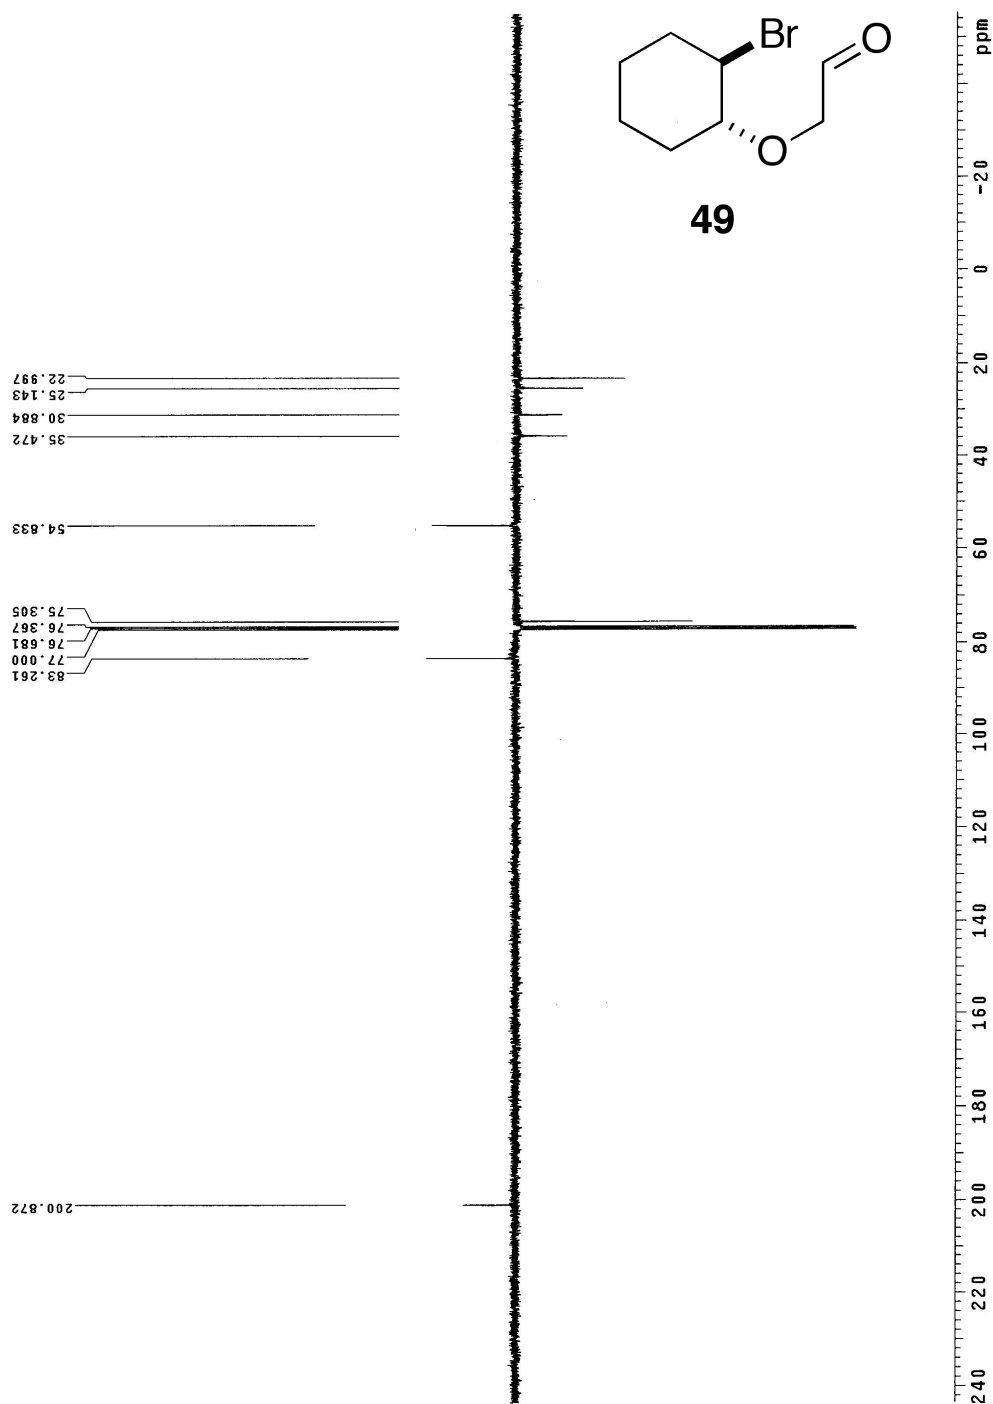

MP2-151H-1  
300 MHz ID in CDCl3 (ref. to CDCl3 @ 7.26 ppm), temp 27.5 C -> actual temp = 27.0 C, id probe  
date: Aug 19 2005 sweep width: 3598Hz acq.time: 2.06 relax.time: 3.0s # scans: 16 d1g.res.: 0.1 Hz/pt h  
file:/mnt/d600/cilivenardata/NA1/MP-Book2/MP2-151H-1.f1d  
spectrometer: lbdw

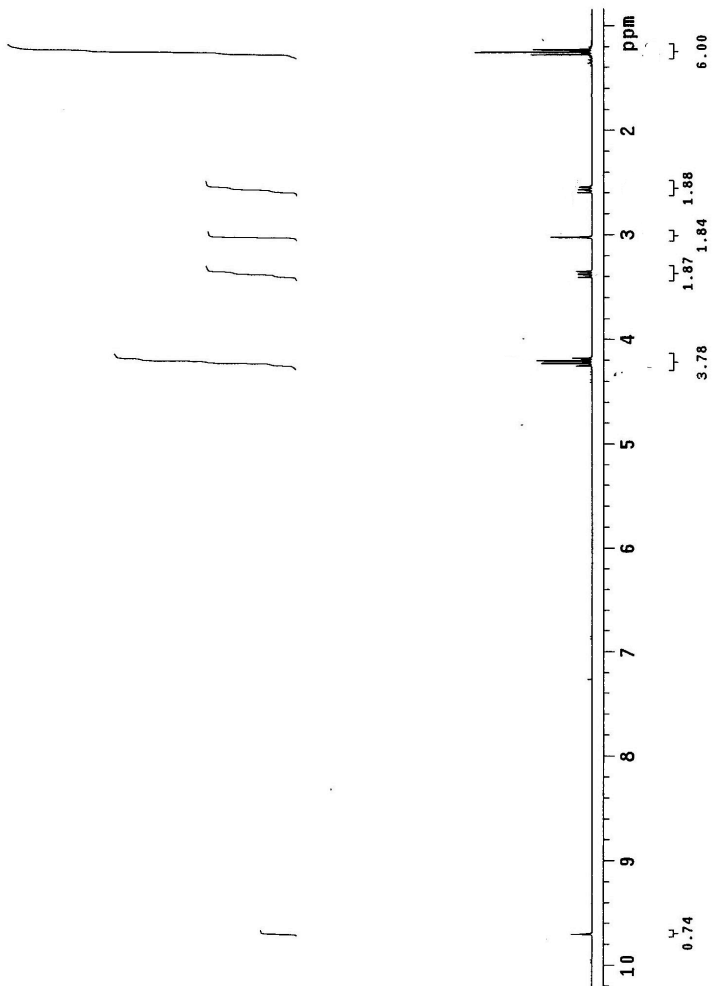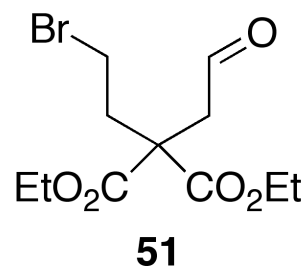

RS G-91

Pulse Sequence: apt

125 MHz APT in CDCl<sub>3</sub> (ref. to CDCl<sub>3</sub> @ 77.0 ppm), temp 27.2 C -> actual temp = 27.0 C, sw probe

CH CH3 positive; C, CH2 negative

date: Jun 28 2001 seqfil: apt

acq.time [s]: 2.0

relax.time [s]: 0.5

sweep width [Hz]: 25000

dig.res. [Hz/pt]: 0.38

file: /mnt/d600/nmr/labdata/Subset1/RSG-91-C13.fid

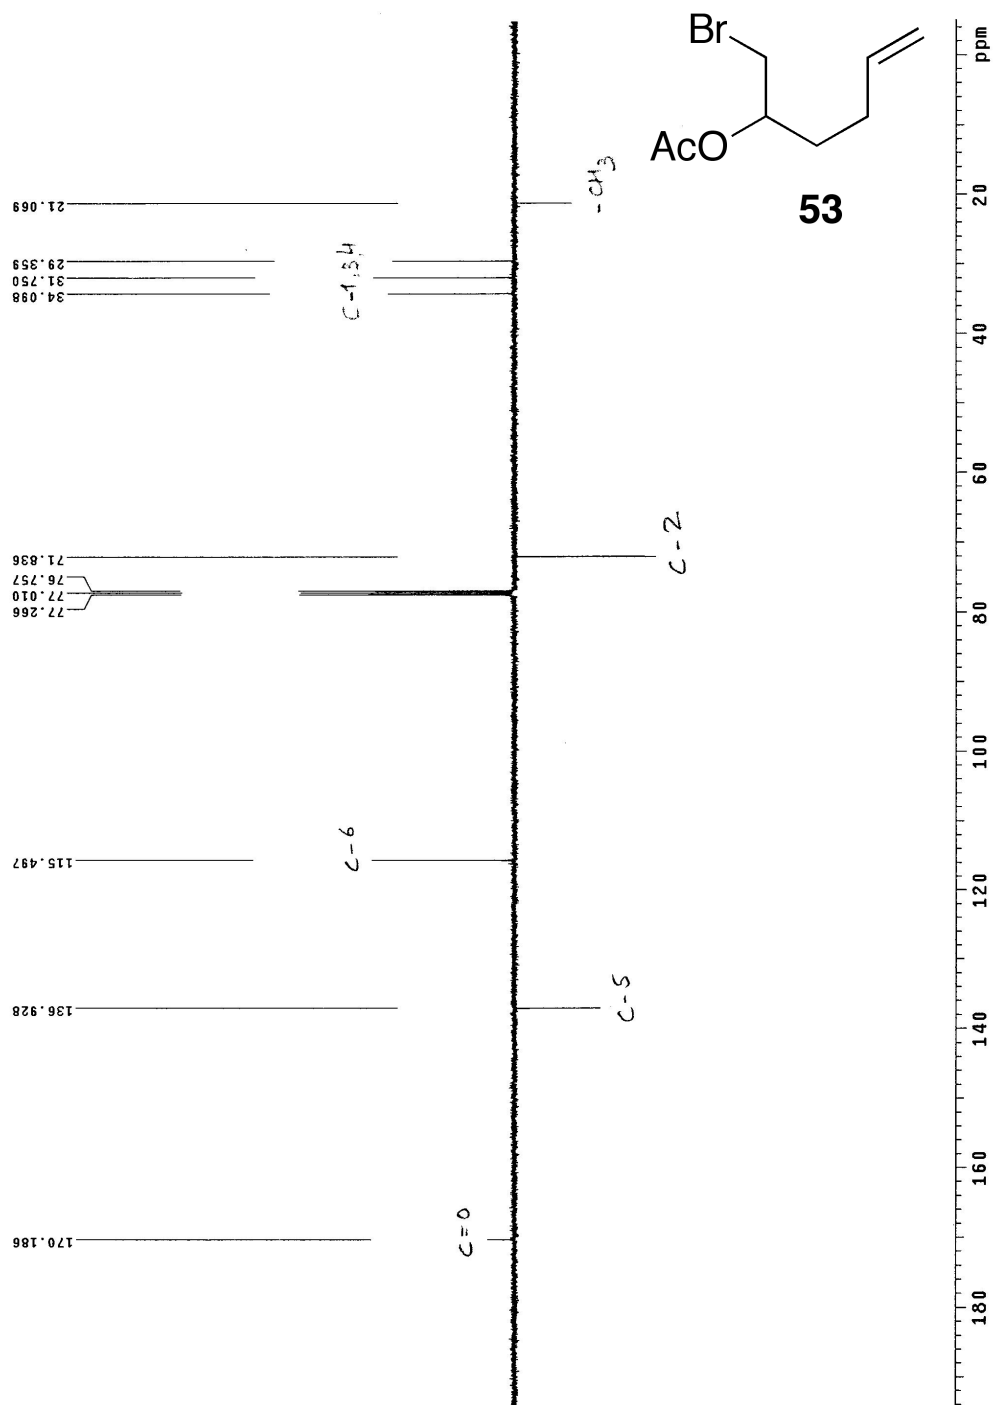

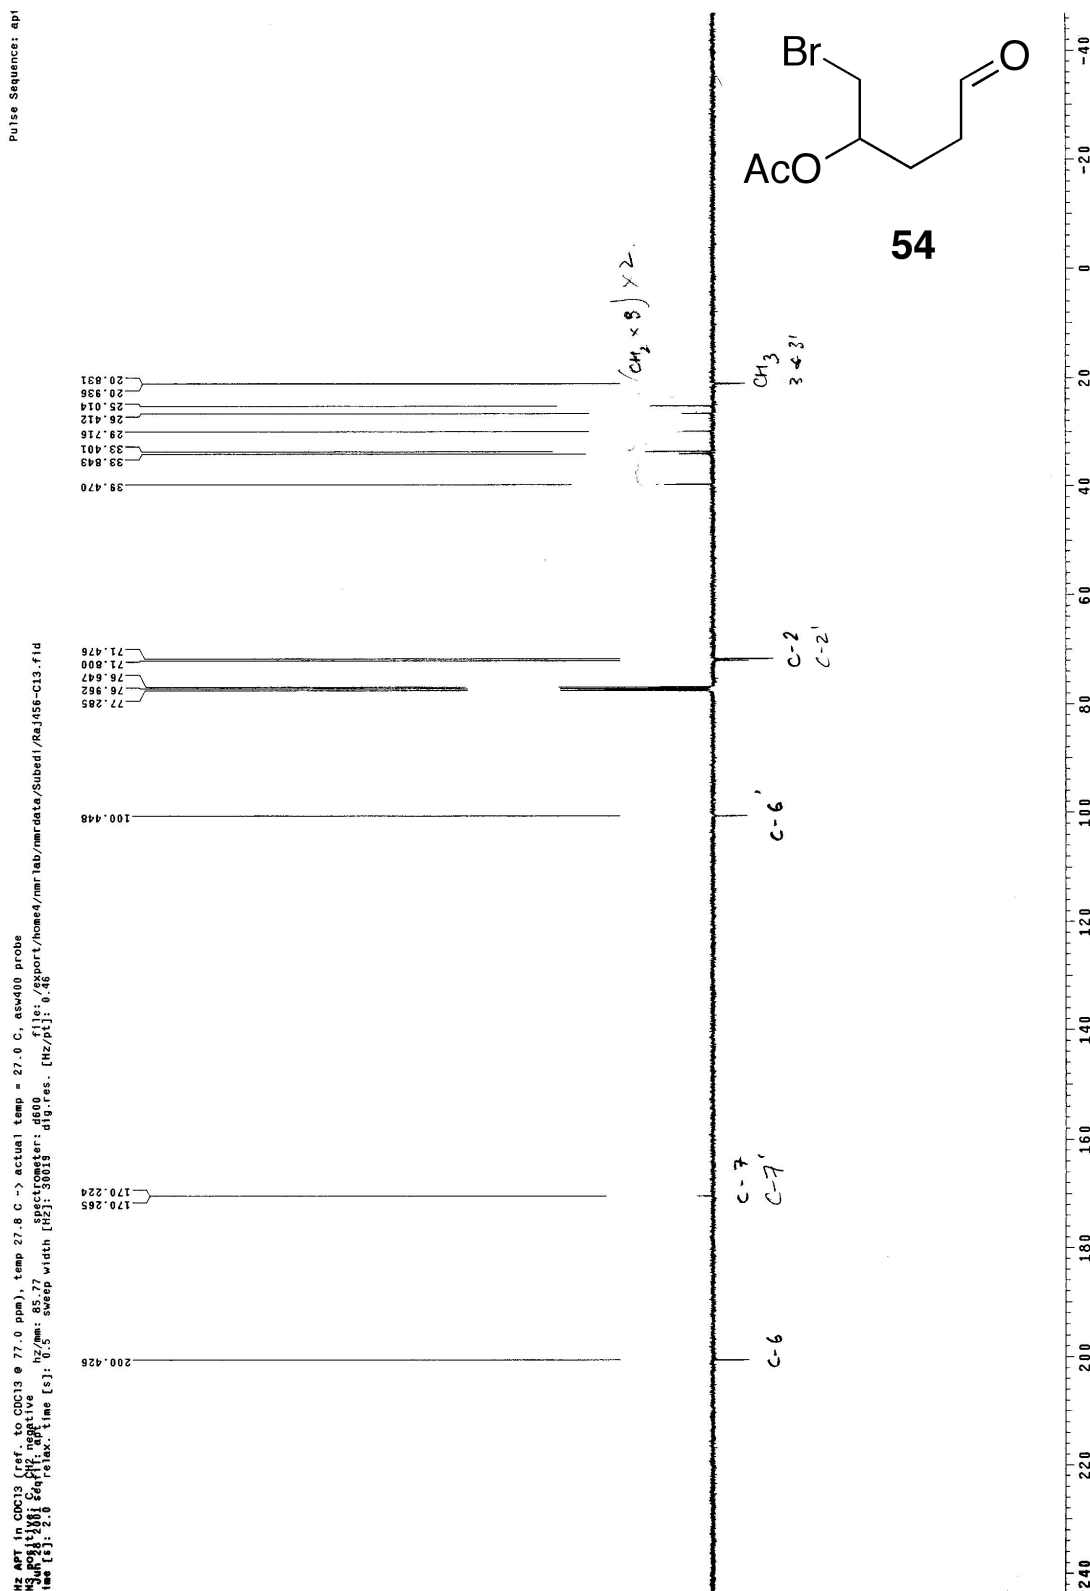



MP3-15C-md  
100 MHz APT in CDCl<sub>3</sub> (ref. to CDCl<sub>3</sub> @ 77.0 ppm), temp 27.0 C -> actual temp = 27.0 C, m400gz probe  
C & CH<sub>2</sub> same, CH & CH<sub>3</sub> opposite side of solvent signal  
date: Sep 26 2005 sweep width: 27027Hz acq.time: 2.0s relax.time: 0.1s # scans: 1248 dig.res.: 0.4 Hz/pt  
spectrometer:m400 file:exp

Pulse Sequence: apt

hz/mm:112.6

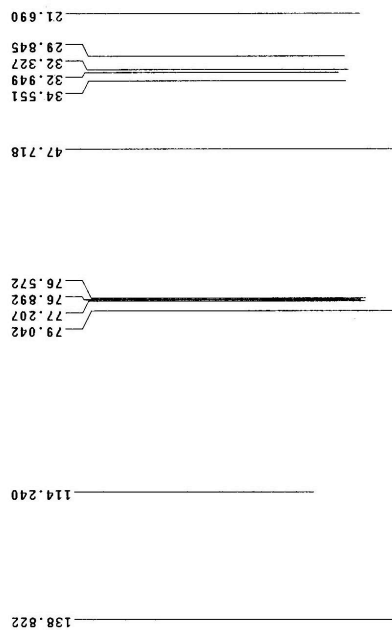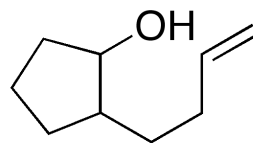

**56** (single isomer)

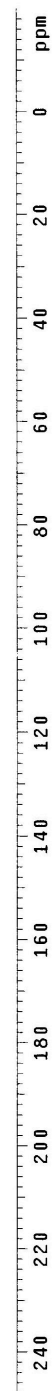

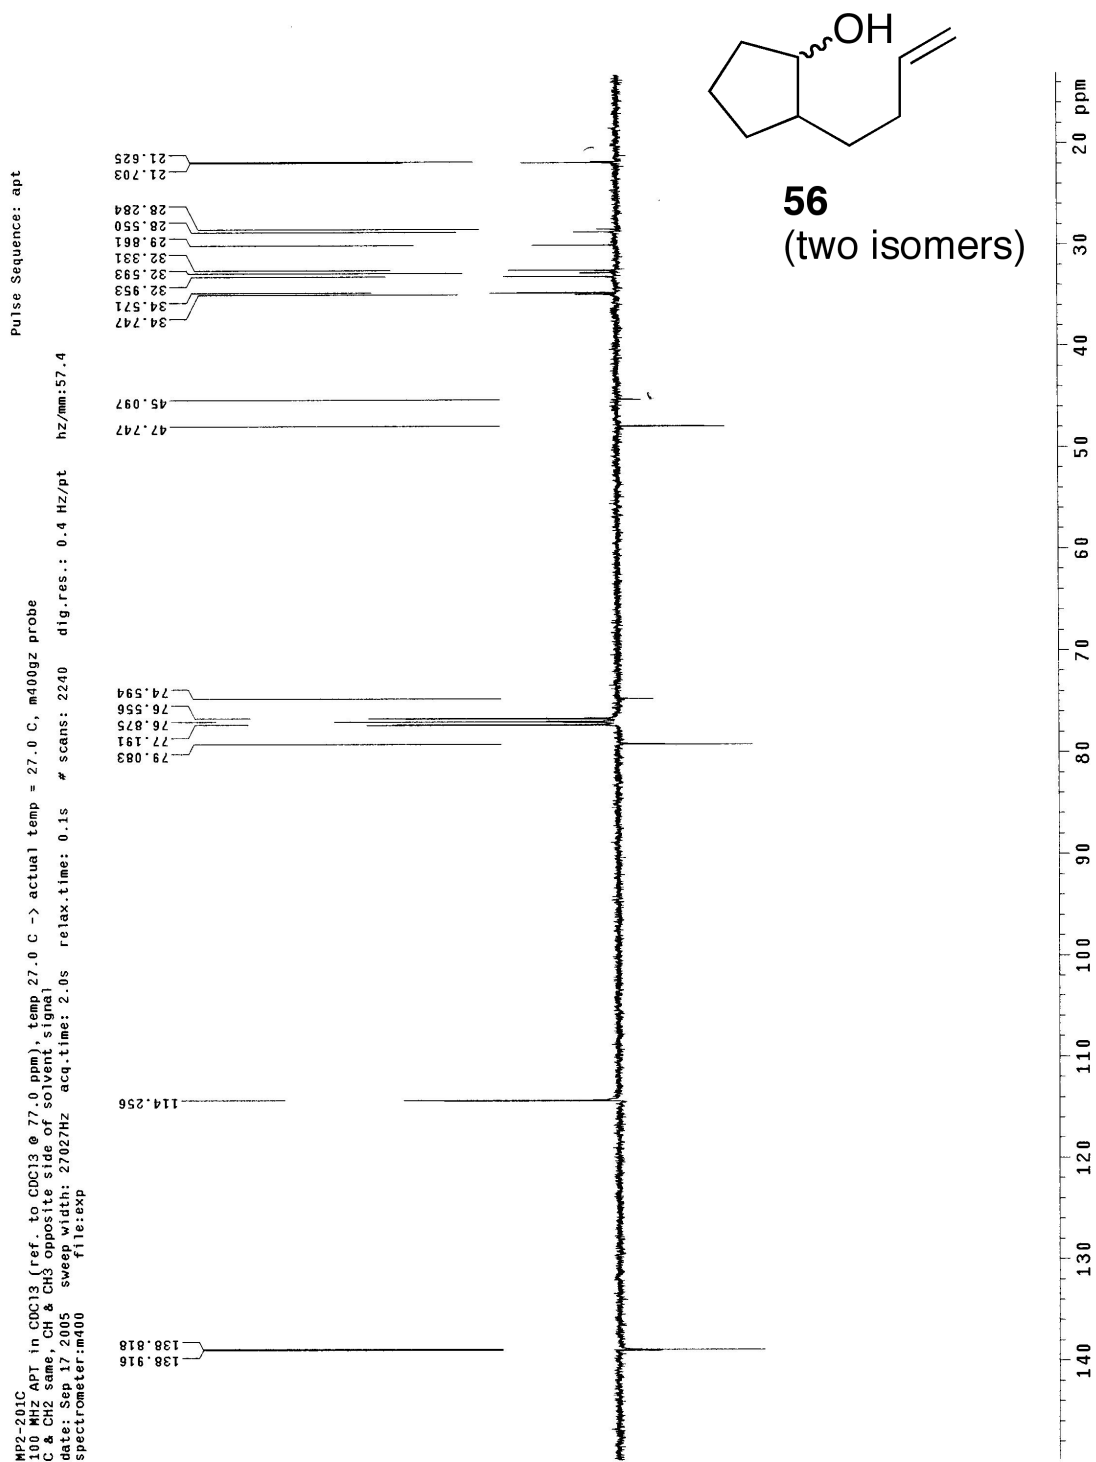

MP3-35C-2  
1100 MHz APT in CDCl<sub>3</sub> (ref. to CDCl<sub>3</sub> @ 77.0 ppm), temp 26.8 C -> actual temp = 27.0 C, asw400 probe  
C & CH<sub>2</sub> same, CH & CH<sub>3</sub> opposite side of solvent signal  
date: Oct 5 2005 sweep width: 26954Hz acq.time: 2.0s relax.time: 0.1s # scans: 256 dig.res.: 0.4 Hz/pt  
spectrometer:1400 file:exp

Pulse Sequence: apt

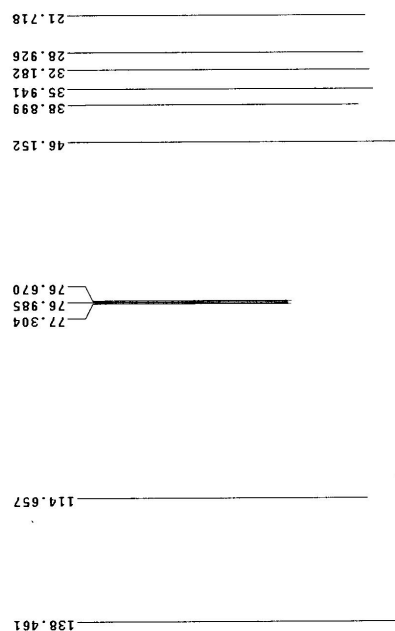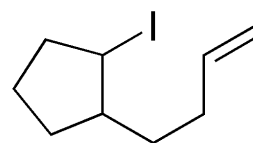

57

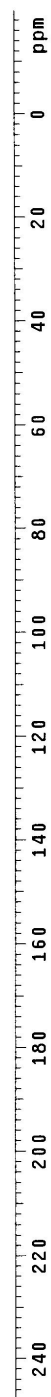

MP3-33C  
m100 MHz APT in CDCl<sub>3</sub> (ref. to CDCl<sub>3</sub> @ 77.0 ppm), temp 27.0 C -> actual temp = 27.0 C, m400g2 probe  
C & CH2 same, CH & CH3 opposite side of solvent signal  
date: Oct 6 2005 sweep width: 27027Hz acq.time: 2.0s relax.time: 0.1s # scans: 400 dig.res.: 0.4 Hz/pt  
spectrometer:m400 file:exp

Pulse Sequence: apt

hz/mm:112.6

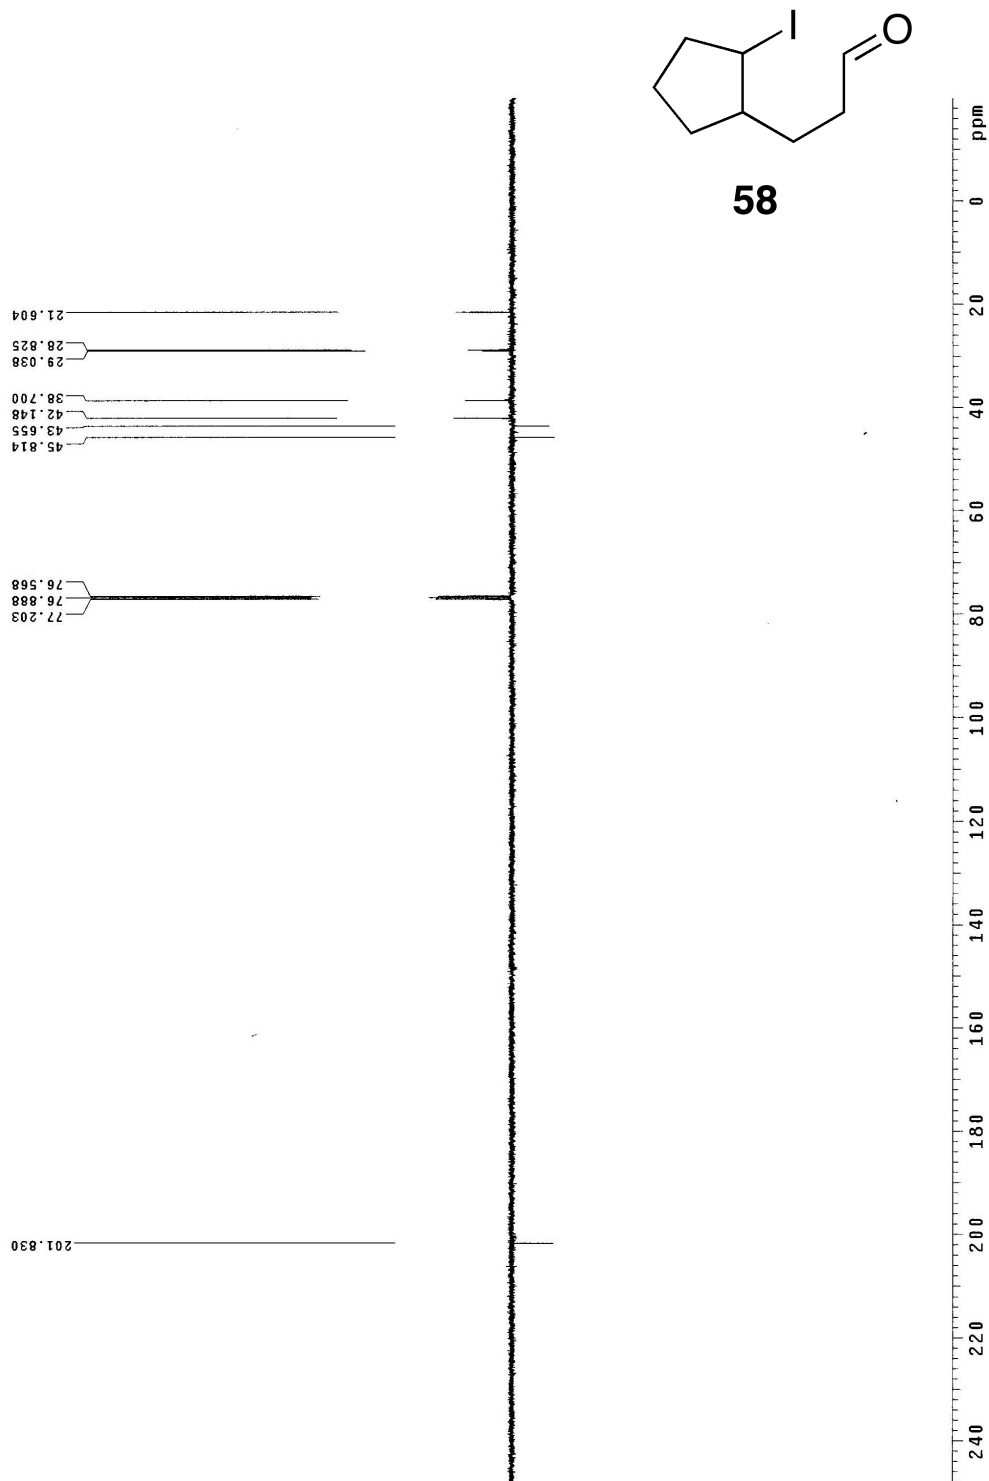

MF3-125C  
m100 MHz API in CDCl3 (ref. to CDCl3 @ 77.0 ppm), temp 27.0 C -> actual temp = 27.0 C, m400qz probe  
C & CH2 same, CH & CH3 opposite side of solvent signal  
date: Jan 7 2006 sweep width: 27027Hz acq.time: 2.0s relax.time: 0.1s # scans: 872 dig.res.: 0.4 Hz/pt  
spectrometer:m400 file:exp

Pulse sequence: apt

hz/mm:112.6

36.889  
33.879  
32.323  
27.420  
26.294  
21.358

77.232  
76.916  
76.597  
68.205

113.876

139.551

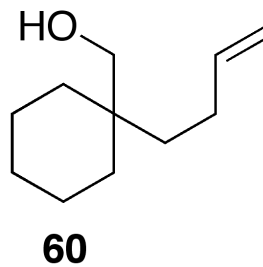

240 220 200 180 160 140 120 100 80 60 40 20 0 ppm

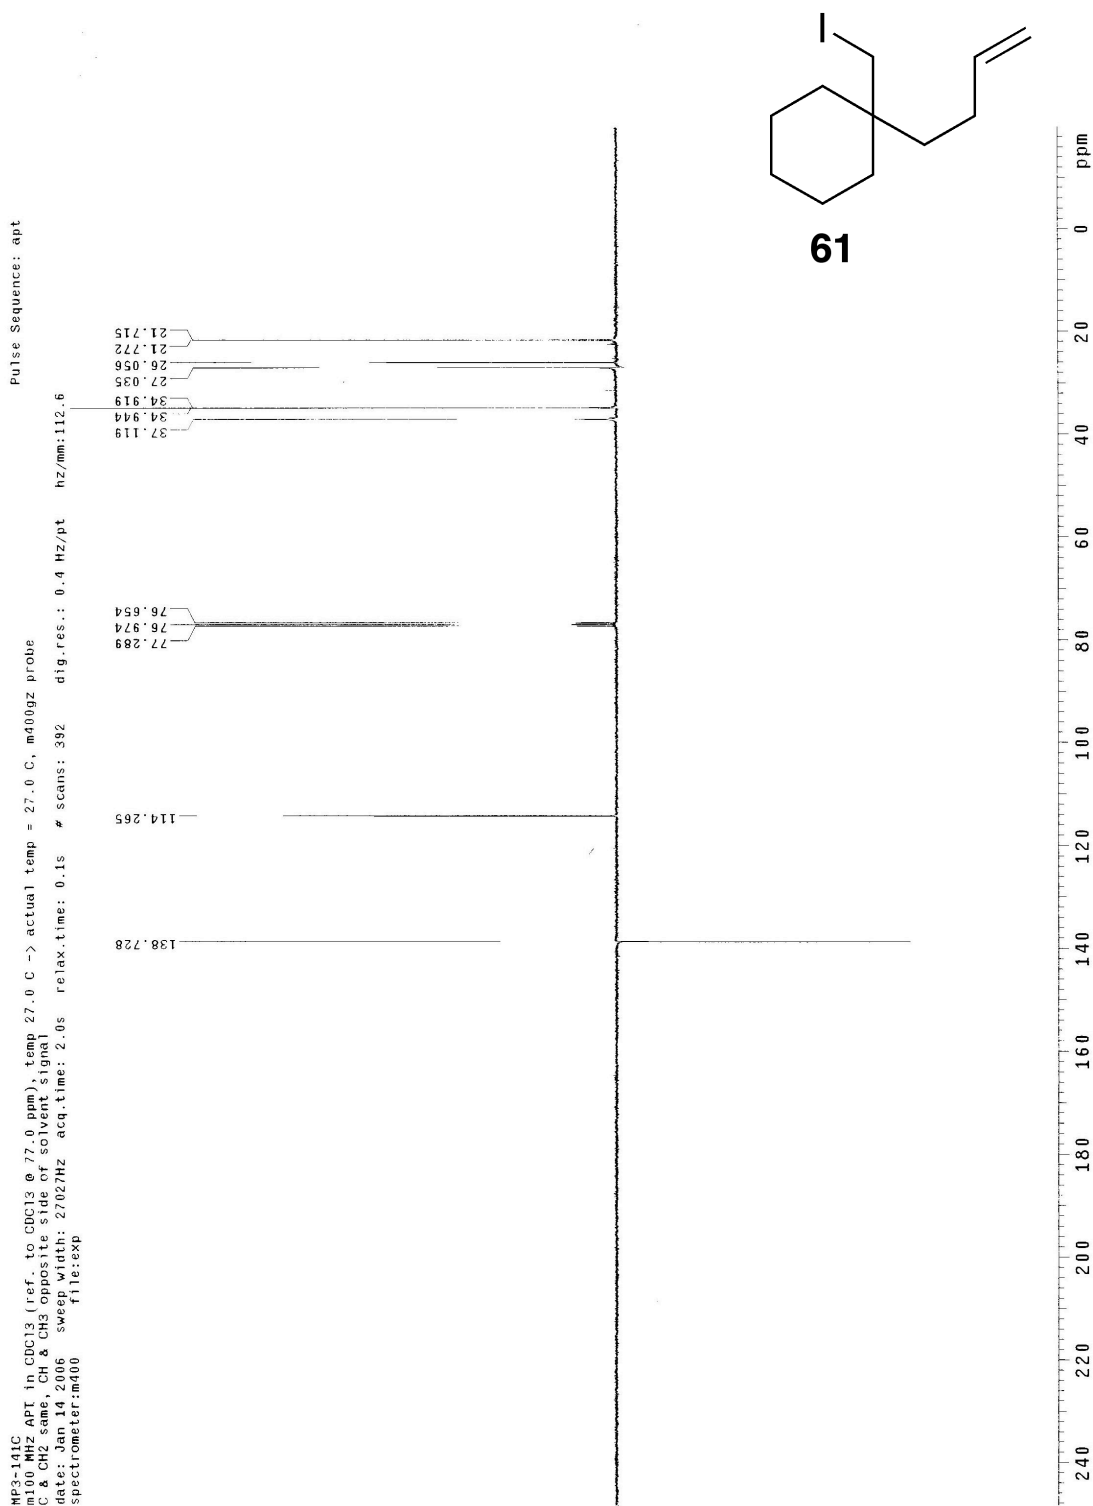

MP3-143C  
1100 MHz APT in CDCl<sub>3</sub> (ref. to CDC13 @ 77.0 ppm), temp 26.8 C -> actual temp = 27.0 C, asw400 probe  
C & CH2 same, CH & CH3 opposite side of solvent signal  
date: Jan 17 2006 sweep width: 26954Hz acq.time: 0.1s # scans: 336 dfg.res.: 0.4 Hz/pt  
spectrometer:1400 file:exp

Pulse Sequence: apt

hz/mm:112.3

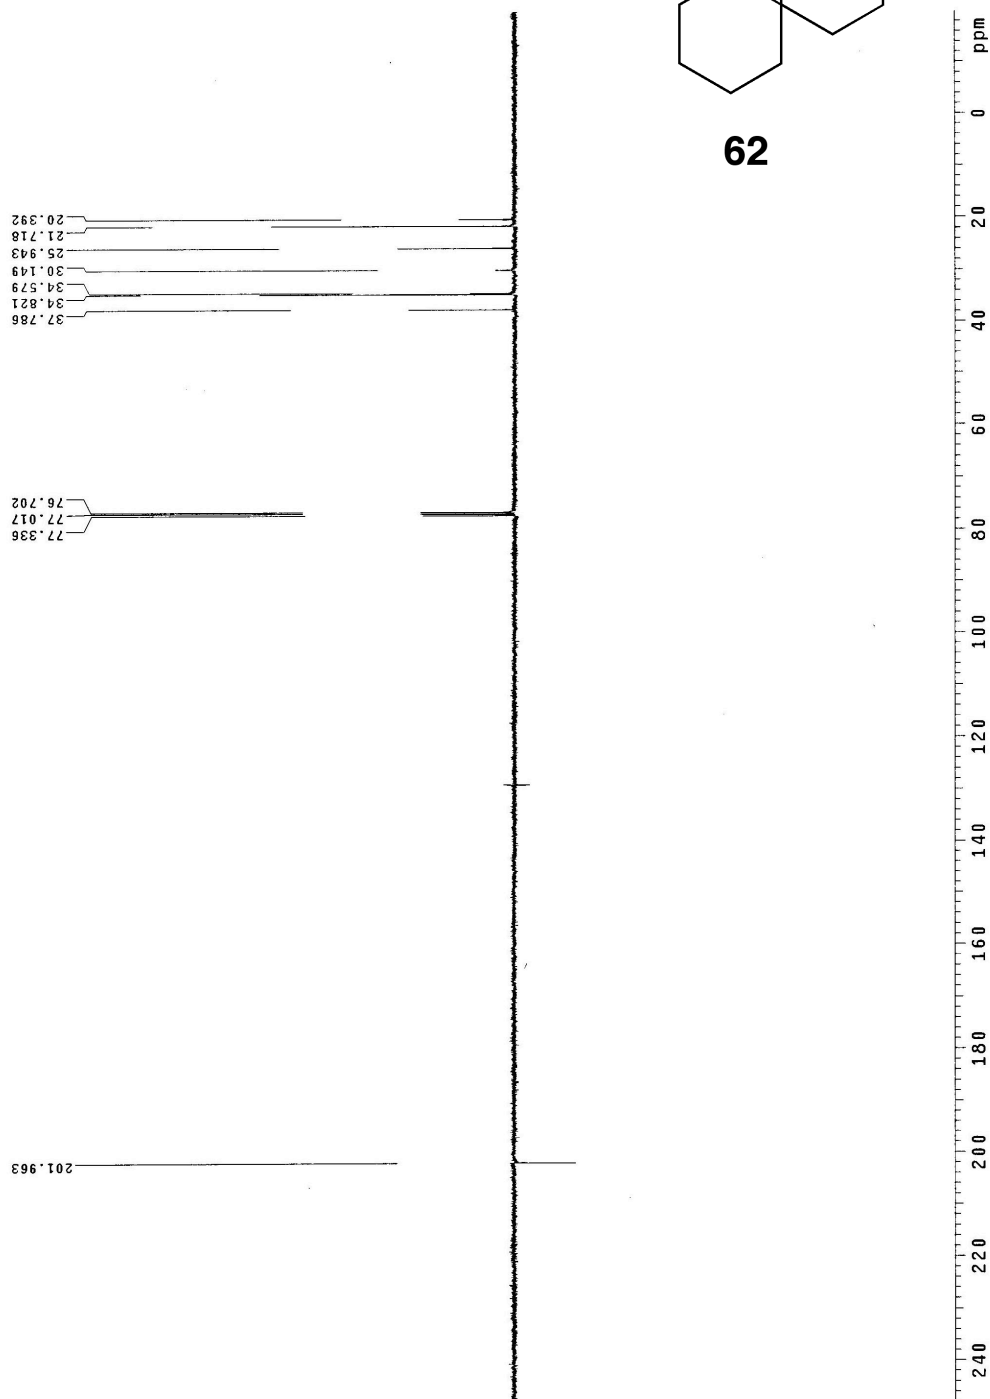

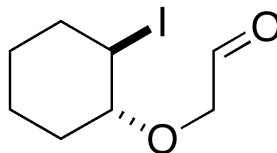

**Trans-[(2-iodocyclohexyl)oxy]acetaldehyde**

MPI-199H  
400 MHz 1D in CDC13 (ref. to CDC13 @ 7.26 ppm), temp 27.0 C -> actual temp = 27.0 C, m400gz probe

Solvent: cdc13  
Temp: 27.0 C / 300.1 K  
File: MPI-199H  
INOVIA-500 "1bow"

Relax. delay 3.000 sec  
Pulse 45.0 degrees  
Acq. time 1.99 sec  
Width 4001 Hz  
16 repetitions  
OBSERVE H1 400.3981759 MHz  
DATA PROCESSING  
FT size 131072  
Total time 1 min, 30 sec

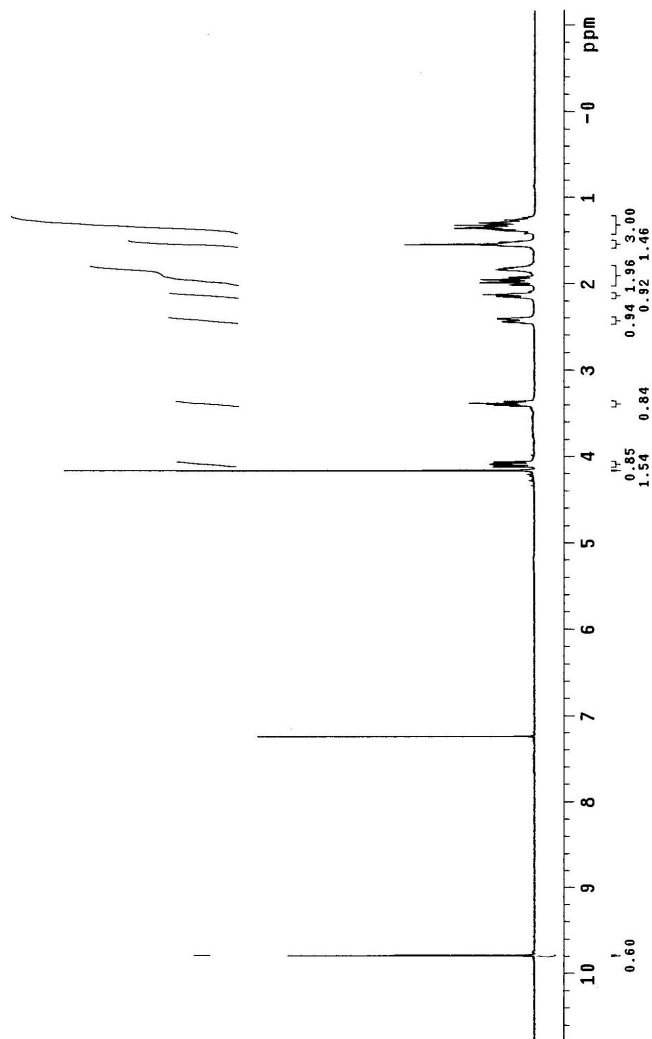



MP2-55C  
100 MHz APT in CDCl<sub>3</sub> (ref. to CDCl<sub>3</sub> @ 77.0 ppm), temp 27.0 C -> actual temp = 27.0 C, m400gz probe  
C & CH<sub>2</sub> same, CH & CH<sub>3</sub> opposite side of solvent signal  
date: Jun 27 2005 sweep width: 27027Hz acq.time: 2.0s relax.time: 0.1s # scans: 152 dfg.res.: 0.4 Hz/pt  
spectrometer:m400 file:exp

Pulse Sequence: apt

hz/mm:112.6

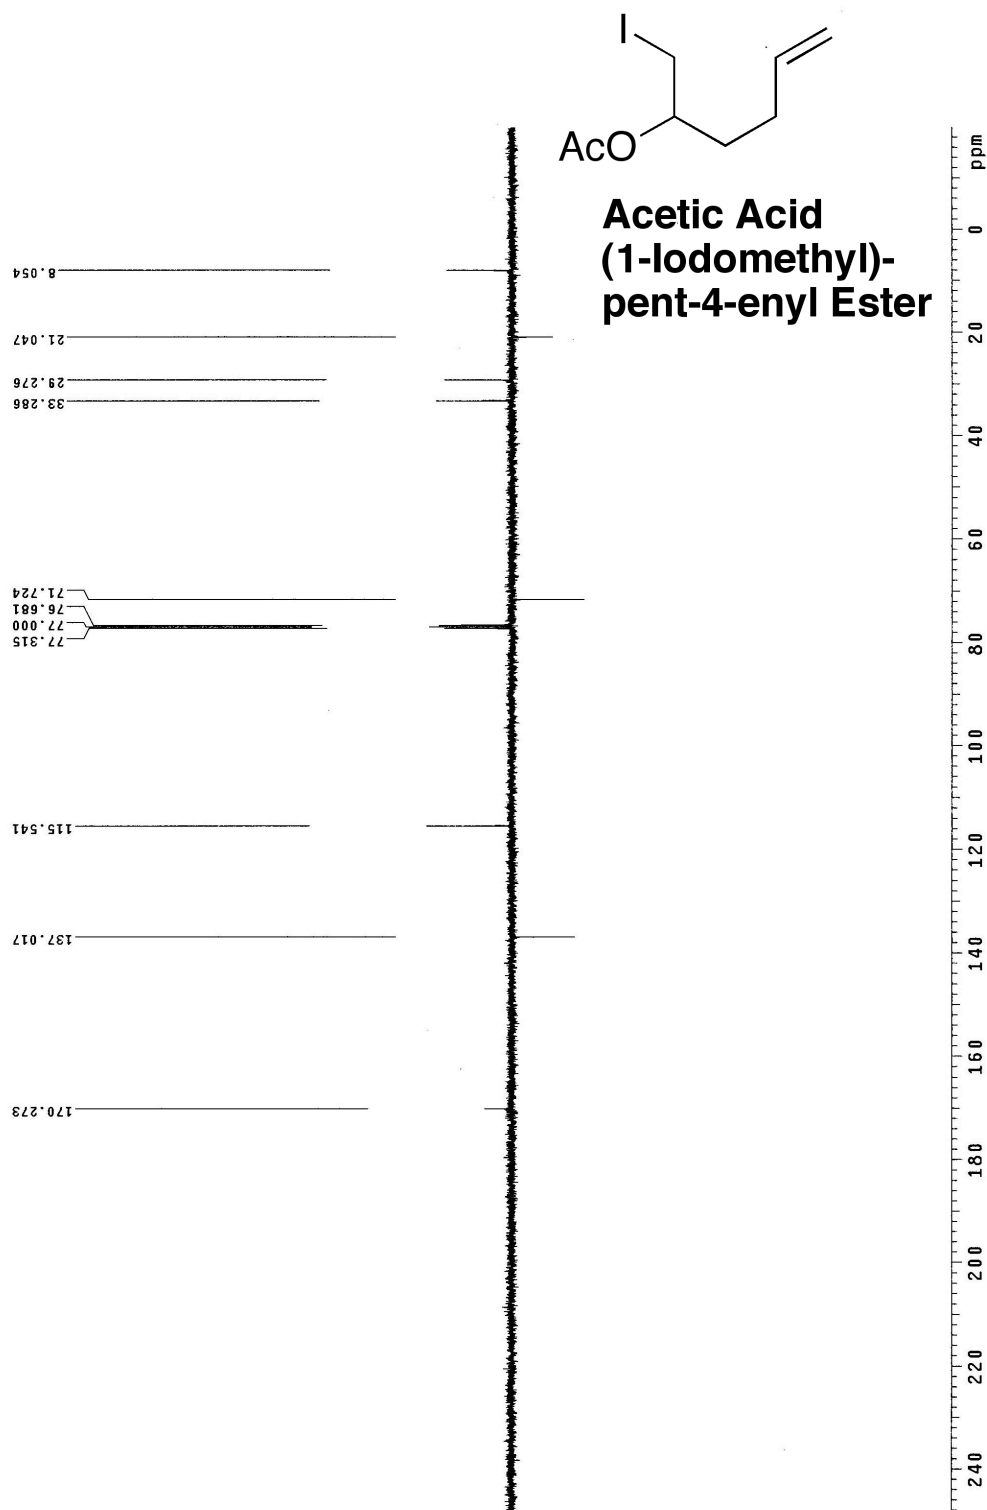

100 MHz APT in CDCl<sub>3</sub> (ref. to CDCl<sub>3</sub> @ 77.0 ppm), temp 27.0 C -> actual temp = 27.0 C, m400g2 probe  
C & CH<sub>2</sub> same, CH & CH<sub>3</sub> opposite side of solvent signal  
date: Jul 2 2005 sweep width: 27027Hz acq.time: 2.0s relax.time: 0.1s # scans: 254 dig.res.: 0.4 Hz/pt  
spectrometer:m400 file:exp

Pulse Sequence: apt

hz/mm:112.6

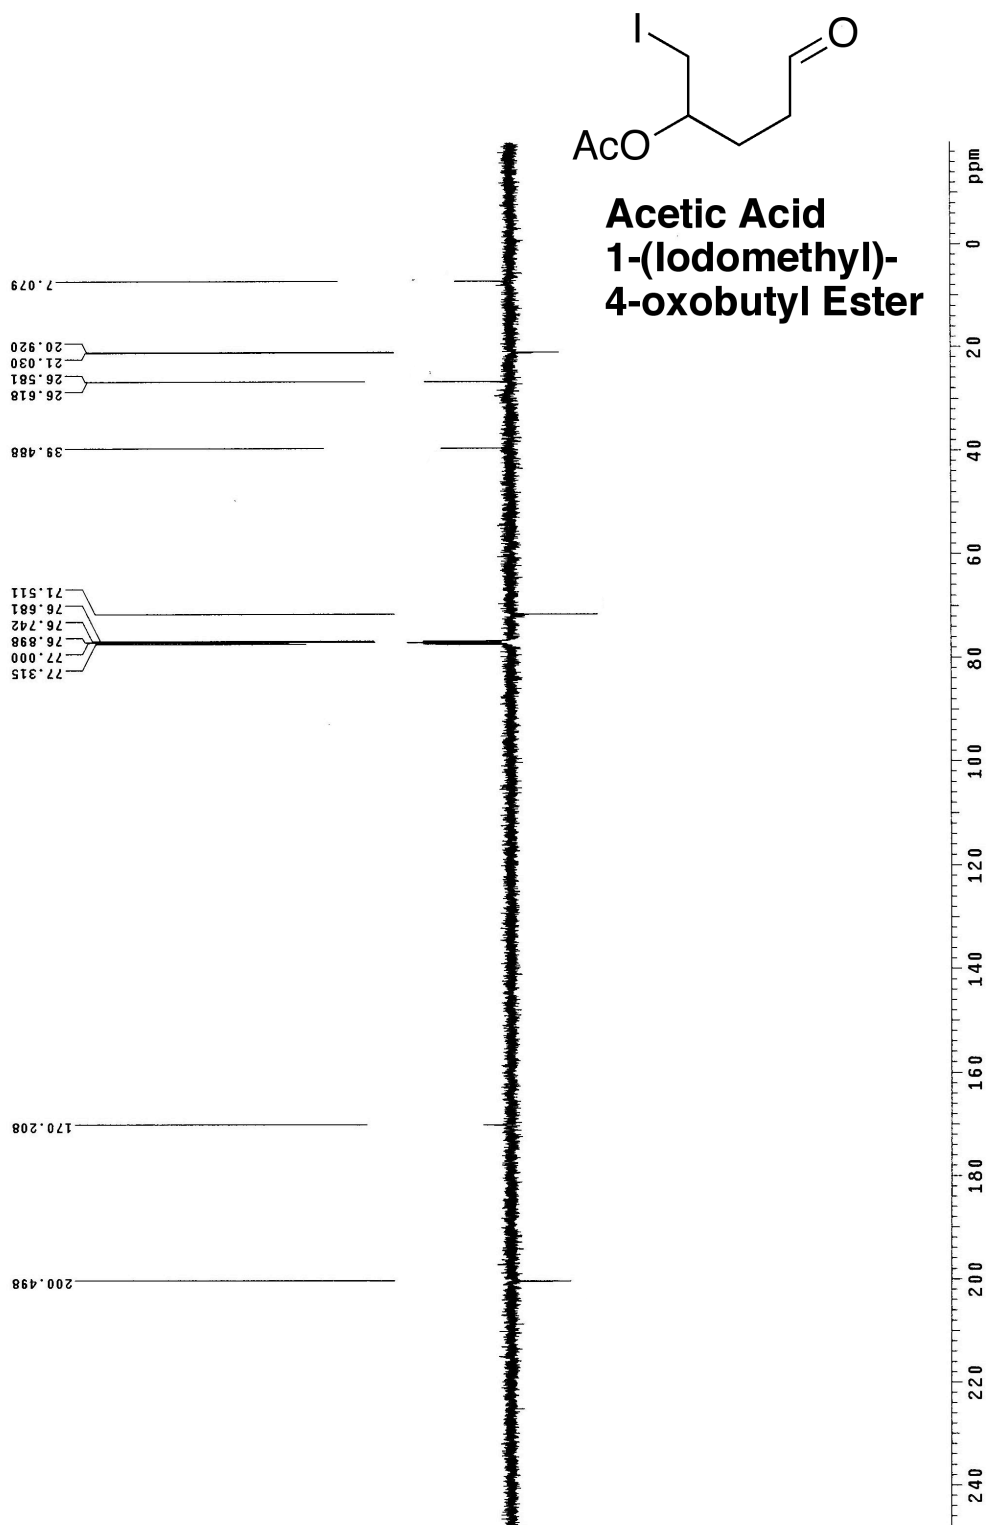

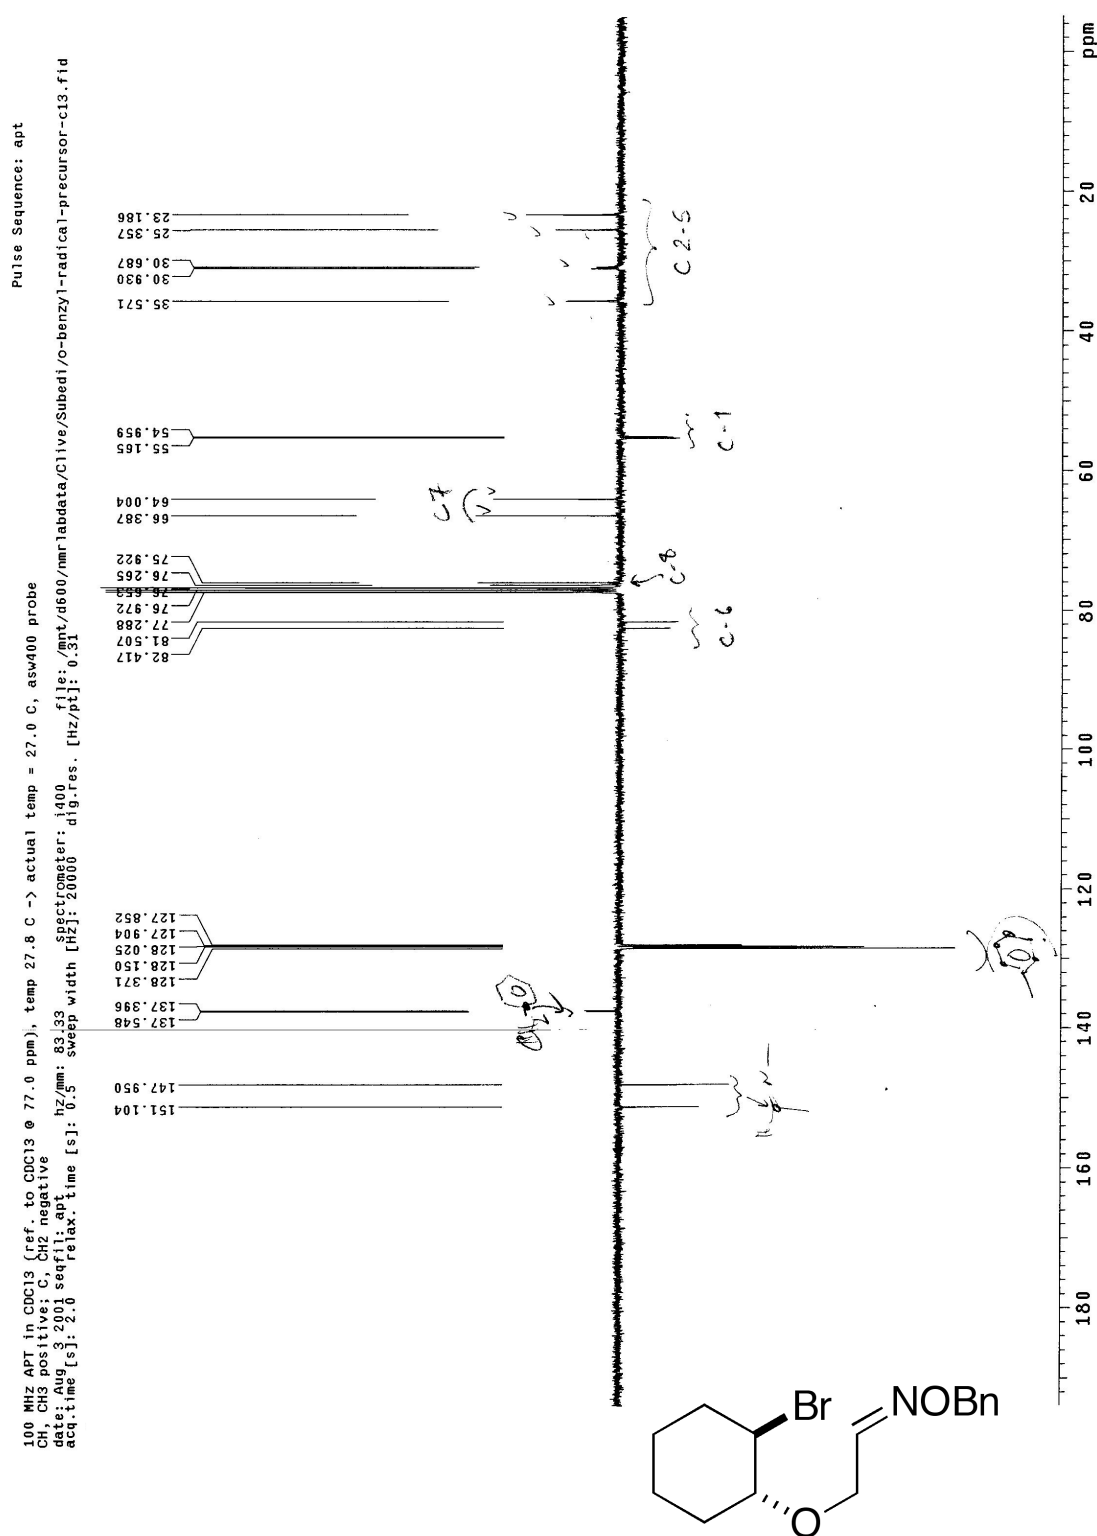

**Trans-2-[(2-bromocyclohexyl)oxy]-  
acetaldehyde *O*-(phenylmethyl)oxime**

*(Handwritten signature)*

100 MHz APT in CDCl<sub>3</sub> (ref. to CDCl<sub>3</sub> @ 77.0 ppm), temp 27.8 C -> actual temp = 27.0 C, asw400 probe  
 CH, CH<sub>3</sub> positive; C, CH<sub>2</sub> negative  
 date: Aug. 2003 seq: 111, apt: time [s]: 83.33 spectrometer: (400  
 acq: time [s]: 2.0 relax: time [s]: 0.5 sweep width [Hz]: 20000 dig: res. [Hz/pt]: 0.31

Pulse Sequence: apt

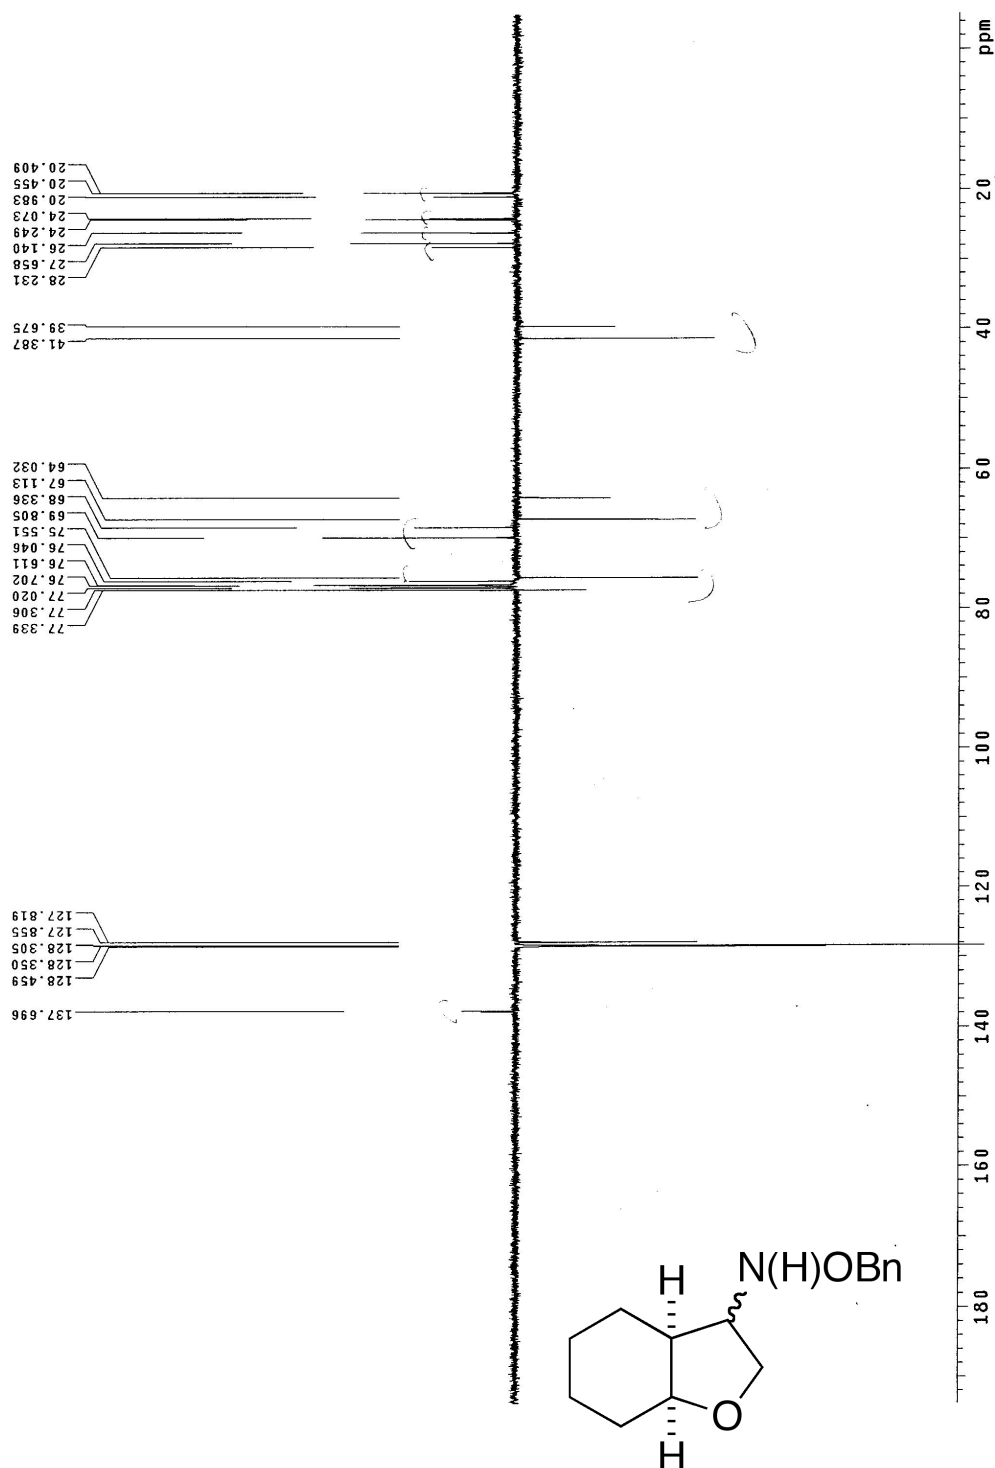

**O-Benzyl-N-[(3a $\alpha$ ,7a $\alpha$ )octahydro-benzofuran-3-yl]hydroxylamine**
